# Supplementary material for: Self-management and blood pressure control in China: a community-based multicentre cross-sectional study
Source: PubMed Central journal article supplement — BMJ Open. 2019 Mar 20;9(3):e025819. doi: 10.1136/bmjopen-2018-025819 (PMC6528047; doi:10.1136/bmjopen-2018-025819), 2019-03-20
Supplement: bmjopen-2018-025819.draft_revisions.pdf [file bmjopen-2018-025819.draft_revisions.pdf]

# BMJ Open

BMJ Open is committed to open peer review. As part of this commitment we make the peer review history of every article we publish publicly available.

When an article is published we post the peer reviewers' comments and the authors' responses online. We also post the versions of the paper that were used during peer review. These are the versions that the peer review comments apply to.

The versions of the paper that follow are the versions that were submitted during the peer review process. They are not the versions of record or the final published versions. They should not be cited or distributed as the published version of this manuscript.

BMJ Open is an open access journal and the full, final, typeset and author-corrected version of record of the manuscript is available on our site with no access controls, subscription charges or pay-per-view fees (<http://bmjopen.bmj.com>).

If you have any questions on BMJ Open's open peer review process please email [info.bmjopen@bmj.com](mailto:info.bmjopen@bmj.com)

# BMJ Open

## Self-Management and Blood Pressure Control in China: A Community Based Multicenter Cross-Sectional Study

|                               |                                                                                                                                                                                                                                                                                                                                                                                                                                                                                                                                                                                                                                                                                                                    |
|-------------------------------|--------------------------------------------------------------------------------------------------------------------------------------------------------------------------------------------------------------------------------------------------------------------------------------------------------------------------------------------------------------------------------------------------------------------------------------------------------------------------------------------------------------------------------------------------------------------------------------------------------------------------------------------------------------------------------------------------------------------|
| Journal:                      | <i>BMJ Open</i>                                                                                                                                                                                                                                                                                                                                                                                                                                                                                                                                                                                                                                                                                                    |
| Manuscript ID                 | bmjopen-2018-025819                                                                                                                                                                                                                                                                                                                                                                                                                                                                                                                                                                                                                                                                                                |
| Article Type:                 | Research                                                                                                                                                                                                                                                                                                                                                                                                                                                                                                                                                                                                                                                                                                           |
| Date Submitted by the Author: | 02-Aug-2018                                                                                                                                                                                                                                                                                                                                                                                                                                                                                                                                                                                                                                                                                                        |
| Complete List of Authors:     | <p>Qu, Zhan; Xi'an Jiaotong University, Health Science Center, School of Nursing</p> <p>Parry, Monica; University of Toronto Lawrence S Bloomberg Faculty of Nursing,</p> <p>Liu, Fang; Xi'an Jiaotong University, Health Science Center, School of Nursing</p> <p>Wen, Xiuling; The First Affiliated Hospital of Xi'an Jiaotong University</p> <p>Li, Jieqiong; The First Affiliated Hospital of Xi'an Jiaotong University</p> <p>Zhang, Yanan; Xi'an Jiaotong University, Health Science Center, School of Public Health</p> <p>Wang, Duolao; Liverpool School of Tropical Medicine, Department of Clinical Sciences</p> <p>Li, Xiaomei; Xi'an Jiaotong University, Health Science Center, School of Nursing</p> |
| Keywords:                     | Hypertension < CARDIOLOGY, self-management, community care, sex, gender                                                                                                                                                                                                                                                                                                                                                                                                                                                                                                                                                                                                                                            |

SCHOLARONE™  
Manuscripts

only

1  
2  
3  
4 **Full Title:** Self-Management and Blood Pressure Control in China: A Community  
5  
6 Based Multicenter Cross-Sectional Study  
7

8 **Authors, Degrees and Affiliations:** Zhan Qu BA, MA, RN, PhD Candidate<sup>1</sup>, Monica  
9  
10 Parry NP-Adult PhD<sup>2</sup>, Fang Liu BSc, RN, MSc, PhD<sup>1</sup>, Xiuling Wen BSc, RN, MSc,  
11  
12 PhD<sup>3</sup>, Jieqiong Li BSc, RN, MSc, PhD<sup>3</sup>, Yanan Zhang BSc, RN, MSc<sup>4</sup>, Duolao Wang  
13  
14 PhD<sup>5</sup>, Xiaomei Li BN, MN, RN, PhD<sup>1\*</sup>  
15  
16

17  
18 **Author Details:**  
19

20 <sup>1</sup>School of Nursing, Health Science Center, Xi'an Jiaotong University, Xi'an, Shaanxi,  
21  
22 P. R. China.  
23

24  
25 <sup>2</sup>Lawrence S. Bloomberg Faculty of Nursing, University of Toronto, Toronto, ON,  
26  
27 Canada.  
28

29  
30 <sup>3</sup>The First Affiliated Hospital of Xi'an Jiaotong University, Xi'an Shaanxi, P. R.  
31  
32 China.  
33

34  
35 <sup>4</sup>Institute of Endemic Diseases, School of Public Health, Health Science Center, Xi'an  
36  
37 Jiaotong University, Xi'an, Shaanxi, P. R. China.  
38

39  
40 <sup>5</sup>Department of Clinical Sciences, Liverpool School of Tropical Medicine, Liverpool,  
41  
42 United Kingdom.  
43

44  
45 **Correspondence:** Xiaomei Li, <sup>1</sup>School of Nursing, Health Science Center, Xi'an  
46  
47 Jiaotong University, 76 Yanta West Road, Xi'an, 710061, Shaanxi, P. R. China,  
48  
49 roselee8825@163.com, (86) 29 8265-7017 (Office), (86) 29 8265-7015 (Fax).  
50

51  
52 **Word Count:** 3785 words  
53

54  
55 **Keywords:** hypertension, self-management, community care, sex, gender  
56

## ABSTRACT

**Objectives** This study explored the relationship between self-management and blood pressure control in China.

**Design** A cross-sectional study.

**Setting** Eight community health centers from four cities in the northeast (Shenyang), northwest (Xi'an), southwest (Chengdu), and south (Changsha) of China.

**Participants** A total of 873 adults with hypertension, including 360 men and 513 women. Hypertension was defined as systolic blood pressure (SBP)  $\geq$  140 mmHg and/ or diastolic blood pressure (DBP)  $\geq$  90 mmHg.

**Outcome measurements** Outcomes included a patient reported survey to measure context, process and outcome variables from the individual and family self-management theory (IFSMT). Blood pressure control was categorized as good control if individuals with hypertension managed to reduce their blood pressure to  $<$  140/90 mmHg, otherwise it was categorized as poor control. Data were analyzed using logistic regression models using SPSSv20.

**Results** A total of 67% (n=586) of participants had poor blood pressure control. Lower personal income (OR=1.50, 95% CI: 1.02-2.22) and limited outpatient care benefits in mainly rural residents (OR=2.22, 95% CI: 1.05-4.72) were associated with poor BP control. Longer disease duration was also a significant predictor of poor BP control (OR=1.03, 95% CI: 1.01-1.04). Self-management practices reduced the odds of having poor BP control (OR=0.98, 95% CI: 0.97-0.99).

1  
2  
3  
4 **Conclusions** The individual and family self-management theory can serve as an  
5  
6 effective theory for understanding the key contexts, processes, and outcomes essential  
7  
8 for blood pressure control in China. Future research should evaluate the effect of a  
9  
10 self-management intervention (e.g., self-monitoring, medication adherence, regular  
11  
12 and routine doctor visits, and social supports) for blood pressure control in China  
13  
14 using a multisite cluster randomized controlled trial. Sex and gender difference, cost  
15  
16 and patient-reported outcomes should also be examined.  
17  
18  
19  
20  
21  
22

### 23 **Strengths and Limitations of this study**

- 24  
25 • A strength is the use of the individual and family self-management theory  
26  
27 (IFSMT) to guide the study.  
28  
29
- 30 • A strength is incorporation of a sex-based analysis.  
31  
32
- 33 • A strength is an attempt to use a surrogate marker of gender in the interpretation  
34  
35 of results (level of education, personal income and employment status).  
36  
37
- 38 • A limitation is the use of the Self-management Scale for Patients with  
39  
40 Hypertension. It has not been widely used and need further psychometric testing.  
41  
42
- 43 • A limitation of the study is the use of self-reported outcomes and the potential for  
44  
45 reporting bias.  
46  
47  
48  
49  
50  
51  
52  
53  
54  
55  
56  
57  
58  
59  
60

## BACKGROUND

The prevalence of hypertension has increased worldwide.<sup>1</sup> It is the most significant risk factor of cardiovascular disease (CVD), accounting for nearly half of the cardiovascular morbidity and mortality in the world.<sup>2-5</sup> In China, hypertension is a serious public health problem; it has increased almost 400% from 1980 to 2015 (from estimated 59 million to 244.5 million),<sup>6-8</sup> and accounted for over 2 million deaths or 24.6% of all-cause mortality.<sup>9</sup> Hypertensive complications in China are similar to other countries, and include stroke, myocardial infarction, heart failure and chronic kidney disease.<sup>10</sup> Stroke is the leading cause of death and disability in China with an annual mortality of 1.6 million;<sup>11</sup> hypertension is the most important risk factor for stroke with the highest attributable risk at 34.6%.<sup>11</sup> Annual stroke healthcare expenditures are approximately ¥40 billion (US\$6.4 billion), causing a huge burden to the Chinese economy.<sup>11</sup> Domestic and international research studies have proved that adequate control of blood pressure reduces stroke,<sup>12</sup> CVD<sup>13</sup> and burden of disease,<sup>14 15</sup> and significantly improves health-related quality of life (HRQOL).<sup>16 17</sup>

The Chinese government launched the Chinese Basic Public Health Service Program in 2009, which provides a package of care that includes hypertension and diabetes screening and management in community health facilities. In many workplaces, free annual physical examinations are offered to individuals with this package of care. In 2013, the 17-country Prospective Urban Rural Epidemiology (PURE) study reported a hypertension awareness of 46.5%, treatment of 87.5%, and

1  
2  
3 control of 32.5%<sup>2</sup> and in 2017, the China Patient-Centered Evaluative Assessment of  
4 Cardiac Events (PEACE) study of 1.7 million individuals with hypertension  
5  
6 suggested the prevalence of hypertension in China was 37.2%, with an awareness of  
7  
8 36%, treatment of 22.9%, and control of only 5.7%.<sup>8</sup> The prevalence of hypertension  
9  
10 among men (41.9%) was higher than women (38.4%), treatment was 29.6% in men  
11  
12 and 36.8% in women, and control was 6.5% in men and 7.4% in women.<sup>18</sup> These  
13  
14 results suggest current governmental packages of care are insufficient to address the  
15  
16 significant costs and burden of hypertension in China. These results also suggest there  
17  
18 are sex- and/or gender-based differences. Gaps between governmental policy and  
19  
20 clinical practice suggest additional strategies must be utilized to optimize  
21  
22 hypertension primary prevention and treatment measures in China.<sup>19</sup>

23  
24  
25  
26  
27  
28  
29  
30 Successful self-management strategies for individuals can result in effective  
31  
32 control of blood pressure<sup>20 21</sup> and the sustainability of healthcare systems.<sup>22</sup> The  
33  
34 individual and family self-management theory (IFSMT) suggests a dynamic model of  
35  
36 self-management that consists of: 1) condition specific factors and physical/social  
37  
38 environments (context), 2) knowledge and beliefs, self-regulation skills and abilities,  
39  
40 and social facilitation (process), and 3) cost, health status, and HRQOL (outcomes).<sup>23</sup>  
41  
42 Self-regulation includes the processes used to change behavior, such as setting goals,  
43  
44 self-monitoring, reflective thinking, planning and participating in specific behaviors,  
45  
46 management of responses, and self-evaluation.<sup>23</sup> Approaches to managing  
47  
48 hypertension using the IFSMT within the Chronic Care Model<sup>24 25</sup> suggests  
49  
50 individuals are active participants and work in partnership with healthcare providers  
51  
52  
53  
54  
55  
56  
57  
58  
59  
60

1  
2  
3 to improve outcomes.<sup>26</sup> A select number of intervention and longitudinal studies have  
4  
5 found that self-regulation skills and abilities improve blood pressure outcomes.<sup>20 27 28</sup>  
6  
7

8  
9 Most recently sex and gender difference have been gaining attention in the  
10 development and management of hypertension.<sup>29-31</sup> Women are twice as likely to have  
11 uncontrolled BP after menopause,<sup>29</sup> have a higher prevalence of obesity,<sup>32</sup> and are less  
12 likely to engage in physical activities<sup>33</sup> compared to men. Although the treatment  
13 benefit of antihypertensive agents may not differ between men and women,<sup>34</sup> women  
14 with hypertension are less likely to achieve recommended BP targets,<sup>35 36</sup> even with  
15 significantly higher use of antihypertensive medications.<sup>36</sup> Both sex and gender play  
16 important roles in predicting cardiovascular risk, and gender (social differences  
17 between men and women) has been reported to be more important than sex (biological  
18 difference between men and women) in predicting risk in multivariable models.<sup>37 38</sup>  
19 Disentangling the impacts of sex and gender in understanding male and female  
20 differences is increasingly recognized as an important aspect for addressing the  
21 knowledge gap in the field of hypertension healthcare. Despite this, gender has been  
22 less frequently evaluated due to inconsistencies in measurement. Smith<sup>39</sup> used level of  
23 education, hours of work, occupation segregation, and household responsibility to  
24 examine the feminine gendered role. Pelletier<sup>37</sup> devised the gender index to assess if  
25 the individual was the primary earner in their household, personal income, hours of  
26 work, and level of stress at home. However, no studies have examined the sex and  
27 gender aspects to blood pressure self-management in community residents with  
28 hypertension in China.  
29  
30  
31  
32  
33  
34  
35  
36  
37  
38  
39  
40  
41  
42  
43  
44  
45  
46  
47  
48  
49  
50  
51  
52  
53  
54  
55  
56  
57  
58  
59  
60



1  
2  
3 The aim of this study is to describe context and process variables within the  
4 IFSMT that impact hypertension control (outcomes) in men and women in China.  
5  
6 This includes exploring both sex and gender aspects to self-management and BP  
7  
8 control in Chinese adults living in the community.  
9  
10  
11  
12  
13  
14

## 15 **METHODS**

16  
17  
18 **Study design and settings.** Using a cross-sectional study design, individuals  
19  
20 with hypertension were recruited from eight community health care centers in the  
21  
22 northeast (Shenyang City), northwest (Xi'an City), southwest (Chengdu City), and  
23  
24 south (Changsha City) of China from April 2015 to January 2016. Four geographic  
25  
26 areas were chosen in an attempt to recruit a representative sample of individuals with  
27  
28 hypertension in China.  
29  
30  
31

32  
33 **Participants.** Recruitment was conducted in four steps. First, forty national  
34  
35 model community health centers accredited between 2011 and 2013 were purposely  
36  
37 selected from the four cities in China.<sup>40-42</sup> These centers provide national standardized  
38  
39 medical care to more than 100,000 individuals within a district in each of the four  
40  
41 cities. Second, two community health care centers were randomly selected in each  
42  
43 city from the forty national model community centers using a random number table  
44  
45 for study participation. Third, 1048 individuals (131 from each community health  
46  
47 center) who had been screened and diagnosed with hypertension within the past six  
48  
49 months were randomly recruited from electronic health care information systems.  
50  
51  
52 Fourth, individuals were contacted to determine their interest in participating in a  
53  
54  
55  
56  
57  
58  
59  
60

1  
2  
3 telephone interview to learn more about the study.  
4  
5

6 Individuals who met the following inclusion criteria were recruited to participate:  
7  
8 age  $\geq$  18 years, SBP  $\geq$  140 mmHg and/or DBP  $\geq$  90 mmHg or prescribed  
9  
10 antihypertensive medication for at least six months and able to identify their  
11  
12 hypertensive medications within their medication schedule, able to read and write the  
13  
14 Chinese language, and able to provide written informed consent to participate in the  
15  
16 study. Individuals were excluded if they were pregnant, had cancer, or were  
17  
18 cognitively impaired.  
19  
20  
21  
22

23 The study was approved by the Ethics Committee of Xi'an Jiaotong University  
24  
25 Health Science Center. Well-trained research assistants explained the purpose and  
26  
27 confidentiality of the study to participants and informed consent was obtained prior to  
28  
29 survey completion.  
30  
31  
32

33 **Patient and public involvement.** Patient and public involvement in research  
34  
35 improves patient-centred care and management.<sup>43</sup> Before planning an intervention  
36  
37 study, it was necessary to consult patients using this cross-sectional study design.  
38  
39 Although patients did not inform the design or questions of this study, the study  
40  
41 provided opportunity to engage with patients and the public across four geographic  
42  
43 regions of China. The investigative team engaged with patients using the principles of  
44  
45 inclusiveness, support, and mutual respect; and an opportunity to develop partnerships  
46  
47 for co-building a future intervention study.<sup>44</sup> Results of this study will be  
48  
49 communicated to patients using public forums in each of the four geographic regions.  
50  
51  
52  
53  
54  
55 Public forums will foster patient partner collaborations for the intervention study.  
56  
57  
58  
59  
60

1  
2  
3 **Measurement.** The IFSMT guided data collection and measurement.<sup>23</sup>  
4  
5

6 **Context.** Demographic (age, sex, marital status, education, personal income, and  
7  
8 health insurance) data were collected by interview using investigator-developed  
9  
10 questionnaires. Marital status was divided into two categories: married or  
11  
12 single/divorced/widowed. Education was represented as: primary school or no formal  
13  
14 education (< 6 years of schooling), high school (6-12 years of schooling), or college  
15  
16 or higher (> 12 years of schooling). Personal income was divided into two categories:  
17  
18  $\leq$  ¥1500 (US\$225) or  $>$  ¥1500 (US\$225) based on the Chinese individual income  
19  
20 tax rate.<sup>45</sup> Health insurance was divided into four categories: Urban Employees'  
21  
22 Medical Insurance (UEMI), Urban Residents' Medical Insurance (URMI), New Rural  
23  
24 Cooperative Medical Scheme (NCMS), or uninsured.  
25  
26  
27  
28  
29

30 Risk behaviors included smoking (smoker [current smokers who smoked more  
31  
32 than one cigarette daily]) or non-smoker [smoked fewer than 6 months and who never  
33  
34 smoke before]) and alcohol consumption (consumer or non-consumer [consumed less  
35  
36 than 1 glass per month and those who never drank before]). Family history of  
37  
38 hypertension was defined as a blood relative such as mother, father, sister, or brother  
39  
40 with hypertension (SBP  $\geq$  140 or DBP  $\geq$  90). Anthropometric measures included  
41  
42 weight and height (body mass index [BMI]) and waist circumference [WC]). Body  
43  
44 mass index was calculated as weight in kilograms divided by height in meters squared  
45  
46 and classified into four levels according to the guidelines for prevention and control of  
47  
48 overweight and obesity in Chinese adults: underweight (< 18.5), normal (18.5-23.9),  
49  
50 overweight (24.0-27.9), and obese: ( $\geq$  28).<sup>46-48</sup> Waist circumference (WC) was  
51  
52  
53  
54  
55  
56  
57  
58  
59  
60

1  
2  
3 divided into two categories: obese (men  $\geq$  90cm, women  $\geq$  80) and normal (men  
4 < 90cm, women < 80cm) according to the International Diabetes Federation<sup>49</sup> and  
5  
6 National Institute for Health and Care Excellence.<sup>50</sup> Comorbidities were self-reported  
7  
8 and based on a physician's diagnosis.  
9  
10

11  
12  
13 **Process.** The self-management scale for individuals with hypertension<sup>51</sup> used in  
14 this study was developed by the China Medical Foundation (CMB) community  
15 chronic disease management research group. Split-half reliability of the scale was  
16 0.976 and Cronbach's alpha ranged from 0.853 to 0.868 on each of the 5 sub-scales.  
17  
18 The five subscales contained 21 Likert scale items addressing: treatment management,  
19 diet management, physical exercise management, lifestyle management, and risk  
20 factor management. Subscale scores ranged from 1 to 5 and total scores ranged from  
21 21 to 105, with higher scores indicating higher self-management behaviors  
22  
23 (Supplementary File). In this this study, we converted the original subscale scores into  
24 standard scores for comparisons.  
25  
26  
27  
28  
29  
30  
31  
32  
33  
34  
35  
36  
37

38 **Outcomes. Blood Pressure.** Blood pressure control was defined as a good if  
39 individuals had a SBP < 140 mmHg and DBP < 90 mmHg. Blood pressures were  
40 taken by trained nurses using a mercury sphygmomanometer according to the  
41 criterion formulated by the Chinese Hypertension League/National Center for  
42 Cardiovascular Disease (CHL/NCCD).<sup>52</sup> Two BP readings for each participant were  
43 obtained at 2-minute intervals in a sitting position and then averaged for analysis.  
44  
45  
46  
47  
48  
49  
50  
51

52 **Bias.** This study is cross-sectional and results may be subject to a non-response  
53 bias.<sup>53</sup> However, recruiting a large number of individuals with hypertension across  
54  
55  
56  
57

1  
2  
3 four areas of China attempted to minimize this bias.  
4  
5

6 **Sample size.** The sample size was based on 15 to 30 subjects per predictor in the  
7  
8 logistic regression model.<sup>54</sup> Given there were 22 predictors, the final sample size was  
9  
10 estimated at 660. The final sample size was increased to a total of 792 participants to  
11  
12 account for a 20% attrition (n=106 participants from each community health care  
13  
14 center).  
15  
16

17  
18 **Data analysis.** All data were analyzed using SPSSv20. Univariate statistics  
19  
20 (frequencies, percentages, and means) were used to describe the contextual factors of  
21  
22 the sample. Bivariate associations between context and process variables were  
23  
24 assessed using  $X^2$  and t-tests, or Mann-Whitney U tests for non-normally distributed  
25  
26 outcome variables.  
27  
28

29  
30 Based on the IFSMT theory, a multivariable logistic regression model was used  
31  
32 to examine the association between context (individual/family, condition specific),  
33  
34 process (BP self-regulation skills & abilities [treatment management, diet  
35  
36 management, physical exercise management, lifestyle management, risk factor  
37  
38 management], community health centers (CHC) visits, hospitals visits and outcomes  
39  
40 (BP control). Preliminary steps included assessing for multicollinearity using the  
41  
42 variance inflation factor (VIF). A hierarchical approach was used to build our final  
43  
44 model,<sup>56</sup> starting with Model 1 , then cumulatively adding clusters (Models 2 and 3) of  
45  
46 variables.  
47  
48  
49  
50

51  
52 In model 1, the non-modifiable context variables related to the individual /family  
53  
54 (age, sex, marital status, education, employment, personal incomes, and health  
55  
56

1  
2  
3 insurance) were explored. In model 2, modifiable variables that were condition  
4  
5 specific (BMI, WC, disease duration, comorbidities, family history, smoking and  
6  
7 drinking status) were added to Model 1. In model 3, processes variables related to  
8  
9 self-regulation skills and abilities (treatment management, diet management, physical  
10  
11 exercise management, lifestyle management, risk factors management, CHC visits,  
12  
13 and hospitals visits) were added to Model 2. Nested models were compared using the  
14  
15 likelihood ratio test (LRT). Clusters were kept in the model if they significantly  
16  
17 contributed to model fit based on the LRT. A two-sided p-value of  $p < 0.05$  was used  
18  
19 to establish statistical significance.  
20  
21  
22  
23  
24  
25  
26  
27

## 28 RESULTS

29  
30 Twenty-nine individuals refused to participate in the interview. Of those who  
31  
32 participated, 114 individuals were excluded due to cognitive impairment (n= 90),  
33  
34 pregnancy (n=11), and cancer (n=13). Of 905 eligible participants, 32 were excluded  
35  
36 because of missing or implausible (more than 50% of the responses) data (Figure 1). A  
37  
38 total final sample of 873 individuals with hypertension (360 males, 513 females)  
39  
40 consented to participate in the study.  
41  
42  
43  
44

45 - Insert Figure 1 -  
46

47 **Context.** Demographic characteristics of participants are presented in Table 1.  
48  
49 The mean age of participants was  $65.4 \pm 9.6$  years. Most of the sample were female  
50  
51 (n=513, 58.8%), married (n=757, 86.7%) and retired (n=596, 68.3%). The majority of  
52  
53 participants had health insurance (n=839, 96.1%) and poor BP control (n= 586, 67.1%)  
54  
55  
56  
57

1  
2  
3 with 9.7± 9.0 years disease duration. Most had an abnormal BMI (n=569, 65.1%) and  
4  
5 WC (n= 644, 73.8%). Women were older (66.0 ± 9.2 years vs. men 64.5 ± 9.9 years),  
6  
7 less likely to have graduated from college (13.8% vs. men 20.8%),  
8  
9  
10 single/divorced/widowed (19.9 % vs. men 3.9%), unemployed (17.2% vs. men 12.2%)  
11  
12 and had a lower personal income (41.5% vs. men 26.1%). Women were also more  
13  
14 likely to have multi-morbidities (57.1% vs. men 47.2%) and have lower DBP  
15  
16 (82.8±10.9 vs. men 86.1±10.41).  
17  
18

19  
20 - Insert Table 1 -  
21  
22

23 **Process.** Self-management process variables are reported in Table 2. The lowest  
24  
25 scores in self-management skills and abilities were in treatment management  
26  
27 (medication adherence, routine and regular doctors' visits, self-monitoring BP) (59.54  
28  
29 ± 17.43), physical exercise management (60.80 ± 32.69), lifestyle management  
30  
31 (63.47± 18.38), and diet management (70.19 ± 23.36). Scores of risk factor  
32  
33 management were highest (86.91 ± 24.64). Women were more likely to have higher  
34  
35 total scores of self-management skills and abilities compared to men (66.96 ± 12.25  
36  
37 vs. men 63.61 ± 14.28) and women had significantly higher scores on diet  
38  
39 management (71.91 ± 22.63 vs. men 67.71 ± 24.18) and risk factor management  
40  
41 (96.18 ± 13.12 vs. men 73.70 ± 30.53). Women also had more hospital visits  
42  
43 compared to men (29.2% vs. men 19.4%).  
44  
45  
46  
47  
48

49 - Insert Table 2 -  
50  
51

52 **Outcomes.** Results of the logistic regressions analyses are depicted in Table 3.  
53  
54 All models had good fit based on the Hosmer-Lemeshow test. In Model 1, personal  
55  
56

1  
2  
3 income, and health insurance were significant for BP control. Participants with lower  
4  
5 personal incomes ( $\leq$  ¥1500 per month vs.  $>$  ¥1500 per month) increased the odds of  
6  
7 poor BP control (OR= 1.55, 95% CI: 1.06-2.25). A higher odds (OR= 2.67, 95% CI:  
8  
9 1.27-5.60) of having poor BP control was observed when paired with NCMS (mainly  
10  
11 for rural residents) compared to UEMI (mainly for urban employees). When BMI,  
12  
13 WC, smoking, drinking, family history, disease duration and comorbidities were  
14  
15 added into Model 2, there was a much higher odds of a lower personal income ( $\leq$   
16  
17 ¥1500 per month vs.  $>$  ¥1500 per month) affecting poor BP control (OR=  
18  
19 1.61, 95% CI: 1.10- 2.36), and slightly lower odds of NCMS compared with UEMI  
20  
21 affecting poor BP control (OR= 2.65, 95% CI: 1.26-5.60). A higher odds of having  
22  
23 poor BP control was also observed with a longer duration of disease (OR=1.03, 95%  
24  
25 CI: 1.01-1.04). A similar pattern was observed when treatment management, diet  
26  
27 management, physical exercise management, lifestyle management, risk factor  
28  
29 management, CHC visits, and hospital visits were added to Model 3.  
30  
31 Self-management treatments reduced the odds of poor BP control in the final model  
32  
33 (OR= 0.98, 95% CI: 0.97-0.99). All models were controlled for personal income,  
34  
35 health insurance, disease duration.  
36  
37  
38  
39  
40  
41  
42  
43

44  
45 - Insert Table 3 -  
46  
47  
48  
49

## 50 **DISCUSSION**

51  
52 The results of this study provide insights into the self-management practices of  
53  
54 individuals with hypertension in China. A total of 67% of individuals with  
55  
56



1  
2  
3 hypertension living in the community did not achieve recommended BP targets. In  
4  
5  
6 previous studies, poor BP control has been linked to a lower socioeconomic status.<sup>55</sup>  
7  
8  
9 <sup>56-58</sup> These results are similar to those found in this study, where more than one third  
10  
11 (35.4%) of the participants had low personal incomes ( $\leq$  ¥ 1500 (US\$225)/ per  
12  
13 month vs  $>$  ¥ 1500 (US\$225)/ per month), incomes that can barely provide the  
14  
15 essentials of living. This inequality of personal income may be directly related to the  
16  
17 health insurance benefit packages in China.<sup>59</sup> Consistent with previous studies in  
18  
19 China, patients with UEMI have benefit packages that are more likely to cover  
20  
21 outpatient services associated with better BP control than those enrolled in NCMS  
22  
23 (extremely limited outpatient care benefits for rural residents).<sup>59-61</sup> Inadequate  
24  
25 insurance is associated with lower rates of BP control, and supported by a US national  
26  
27 Health and Nutrition Examination Survey (NHANES).<sup>62</sup> Interestingly, the majority of  
28  
29 lower personal incomes were associated with women. Women with hypertension were  
30  
31 older, more likely to be single/divorced/widowed, have lower education, and more  
32  
33 likely to be unemployed. Women were also much less likely to smoke or drink. These  
34  
35 findings are consistent with several national surveys and other cross-sectional  
36  
37 studies.<sup>63-65</sup> Moreover, level of education, hours of work, occupation and  
38  
39 responsibility in caring for children has been conceptualized by others as  
40  
41 gender-related.<sup>39</sup> Gender is generally defined across four dimensions including gender  
42  
43 roles, gender identity, gender relationships and institutionalized gender.<sup>66</sup> Although  
44  
45 sex did not appear to affect BP control in this study, it may be that gender has an  
46  
47 important role in the self-management of BP. These findings would be consistent with  
48  
49  
50  
51  
52  
53  
54  
55  
56  
57  
58  
59  
60

1  
2  
3 others who found traditional sex differences in cardiovascular disease risk factors may  
4  
5 be partly explained by feminine personality traits. (i.e., gender).<sup>37</sup> Lower educated  
6  
7 women compared with higher educated women and non-working women compared  
8  
9 non-working men has been associated with poor blood pressure control.<sup>67 68</sup> The  
10  
11 important role gender may play in BP control requires further investigation.  
12  
13  
14

15  
16 Results from this study also suggests longer disease duration increases the odds  
17  
18 of having poor BP control. Women in this study were significantly older and more  
19  
20 likely to have more than one comorbidity compared to men. More women had  
21  
22 arthritis and back and neck problems compared to men. Biological sex influences the  
23  
24 development of comorbid or multi-morbid disease,<sup>69 70</sup> such as hypertension after  
25  
26 menopause.<sup>32</sup> Comorbidities among women aged 60-79 years with hypertension have  
27  
28 been previously reported.<sup>69 70</sup> They increase the complexities of care for women,<sup>71</sup> and  
29  
30 have been associated with poor self-care ability.<sup>71</sup> Low income has not only been a  
31  
32 predictor resulting in low adherence to medication,<sup>72</sup> it has also been a factor  
33  
34 associated with the development of multi-morbid disease.<sup>73</sup> More women in this study  
35  
36 also lived alone with fewer supports compared to men. These findings may explain  
37  
38 the more frequent unscheduled physician and CHC visits in women and provide  
39  
40 important information for developing effective self-management interventions to  
41  
42 improve BP control in men and women with hypertension in the future.  
43  
44  
45  
46  
47  
48  
49

50 This study is one of few to compare hypertensive self-management skills in  
51  
52 treatment, diet, physical exercise, lifestyle, and risk factors in China. Poor BP control  
53  
54 was significantly associated with low self-management skills, especially in treatment  
55  
56  
57

1  
2  
3 management (e.g., medication adherence, regularly scheduled doctors' visits, and  
4  
5 self-monitoring of BP). This is supported by the IFSMT theory, which purports  
6  
7 successful BP control at the individual level is related to an individual's  
8  
9 self-management skills and their involvement in the treatment and control of their  
10  
11 condition.<sup>74</sup> A lifelong adherence to prescribed anti-hypertensive medications, regular  
12  
13 clinic visits, and self-monitoring skills have assisted other individuals to control their  
14  
15 blood pressure.<sup>75 76</sup> Non-adherence to treatment management is related to a higher risk  
16  
17 of cardiovascular morbidity and mortality.<sup>77 78</sup> Hypertension is an asymptomatic  
18  
19 disease, most individuals with hypertension do not experience symptoms and may not  
20  
21 feel it necessary to adhere to prescribed or suggested treatment regimes.<sup>79</sup> Moreover,  
22  
23 medication side effects may also deter individuals from adhering to prescribed or  
24  
25 suggested treatment regimes, especially in the elderly Chinese.<sup>80</sup> The perceived  
26  
27 benefits of Chinese herbs may be more important than western antihypertensive  
28  
29 medications for elderly Chinese who tend to be less adherent with western  
30  
31 antihypertensive medications and believe Chinese herbs have fewer side effects.<sup>81</sup>  
32  
33 Integrating traditional practices into hypertension management regimes with frequent  
34  
35 and careful monitoring of side effects of and adjustment of medications may be  
36  
37 warranted. Effectiveness and adherence to antihypertensive medication regimes  
38  
39 depends on regularly scheduled visits to community health centers.<sup>82</sup> Regular BP  
40  
41 monitoring also reduces hypertension,<sup>83 84</sup> suggesting home BP monitoring should  
42  
43 have a primary role in long-term BP control.  
44  
45  
46  
47  
48  
49  
50  
51  
52  
53

54 The results of this study also show that women are more likely to have better  
55  
56  
57

1  
2  
3 skills in diet and risk factor management. The findings are consistent with those of  
4  
5 Choi<sup>64</sup> and Zhou<sup>85</sup> who report that women with hypertension have higher diet  
6  
7 management skills, especially related to the daily consumption of fresh vegetables and  
8  
9 fruits, which are thought to be protective factors associated with better BP control.<sup>85</sup>  
10  
11 Men with hypertension were also more likely to drink alcohol and smoke and have  
12  
13 poor BP control.<sup>86</sup> Diet and risk factor management were not significantly associated  
14  
15 with BP control in this study. It maybe because diet management (e.g., balanced diet  
16  
17 and salt/sodium control within 6 grams daily) is difficult for participants to  
18  
19 conceptualize or measure or it may be because diet and risk factor management (e.g.,  
20  
21 smoking and drinking status) were self-reported responses. Fewer women reported  
22  
23 smoking and/or drinking, had higher WC, and had higher scores on risk factor  
24  
25 management. Again, considering gender-related characteristics in addition to  
26  
27 traditional sex differences in the self-management of hypertension would be important  
28  
29 in future research.  
30  
31  
32  
33  
34  
35  
36  
37

38 There are several limitations to the study. First, this study is cross-sectional and  
39  
40 results may be subject to a non-response bias.<sup>53</sup> However, recruiting a large number of  
41  
42 individuals with hypertension across four areas of China attempted to minimize this  
43  
44 bias. Second, many of the context and process variables were self-reported, increasing  
45  
46 the potential for a response bias. Third, the scale of self-management for patients with  
47  
48 hypertension scale has not been widely used and need further psychometric testing.  
49  
50 The strengths of the study include use of the individual and family self-management  
51  
52 theory and incorporation of sex and gender-based analysis and interpretation.  
53  
54  
55  
56  
57  
58  
59  
60

## CONCLUSION

This is one of few studies using IFSMT theory to assess how context and process variables influence self-management outcomes in individuals with hypertension.

Context variables related to longer disease duration, lower income, and NCMS health insurance (inadequate outpatient care benefits for rural residents) were associated with poor control of hypertension in China. Lower cost sharing of outpatient care, increasing access to preventive care, and improving accessibility to medications and self-management strategies NCMS enrollees should be considered by Chinese health care policy makers. Moreover, sex and gender-related characteristics appear to affect BP control. Strategies to improve knowledge and provide social supports need to be investigated in future randomized controlled trials.

**Acknowledgements** We thank all participants involved in the research. We are grateful to the nurses, doctors and health care providers in the community health centers for their efforts in coordination of the fieldwork. We thank Ying Zhang, RN, Yue Ma, RN and Yiping Nan, RN for their assistance with data collection.

**Contributors** XML was a major contributor in project administration, research design, organizing the fieldwork, giving advice on the manuscript writing, and supervision.

ZQ and MP were major contributors in data analysis, manuscript writing and revision.

ZQ, FL, XLW and JQL were involved in community nursing training in blood pressure measurement, providing patient-centered questionnaire instructions,

1  
2  
3 collecting data, and inputting results into the database. ZQ, MP, YNZ and DLW  
4  
5 analyzed and interpreted all patient data. All authors have read and approved the final  
6  
7 manuscript.  
8  
9

10 **Funding** This work was supported by China Medical Board, Grant Number (11-085).  
11  
12

13 **Competing interests** None declared.  
14  
15

16 **Patient consent** Obtained.  
17

18 **Ethics approval** This study was approved by the ethics review committee of Xi'an  
19  
20 Jiaotong University.  
21  
22

23 **Provenance and peer review** Not commissioned; externally peer reviewed.  
24  
25

26 **Data sharing statement** No additional data are available.  
27  
28

## 29 30 REFERENCES

- 31 1. NCD Risk Factor Collaboration (NCD-RisC). Worldwide trends in blood pressure  
32 from 1975 to 2015: a pooled analysis of 1479 population-based measurement studies  
33 with 19·1 million participants. *The Lancet* 2017;389(10064):37-55. doi:  
34  
35 [https://doi.org/10.1016/S0140-6736\(16\)31919-5](https://doi.org/10.1016/S0140-6736(16)31919-5)  
36  
37  
38  
39 2. Chow CK, Teo KK, Rangarajan S, et al. Prevalence, awareness, treatment, and  
40  
41 control of hypertension in rural and urban communities in high-, middle-, and  
42  
43 low-income countries. *Jama* 2013;310(9):959-68. doi: 10.1001/jama.2013.184182  
44  
45  
46  
47 3. Roger VL, Go AS, Lloyd-Jones DM, et al. Executive summary: heart disease and  
48  
49 stroke statistics--2012 update: a report from the American Heart Association.  
50  
51  
52  
53 *Circulation* 2012;125(1):188-97. doi: 10.1161/CIR.0b013e3182456d46  
54  
55  
56 4. Liu L. Cardiovascular diseases in China. *Biochemistry and cell biology* =  
57  
58  
59

- 1  
2  
3  
4 *Biochimie et biologie cellulaire* 2007;85(2):157-63. doi: 10.1139/o07-004 [published  
5  
6 Online First: 2007/05/31]  
7  
8 5. He J, Gu D, Wu X, et al. Major causes of death among men and women in China.  
9  
10 *The New England journal of medicine* 2005;353(11):1124-34. doi:  
11  
12 10.1056/NEJMsa050467 [published Online First: 2005/09/16]  
13  
14  
15 6. Reynolds K, Gu D, Muntner P, et al. Geographic variations in the prevalence,  
16  
17 awareness, treatment and control of hypertension in China. *Journal of hypertension*  
18  
19 2003;21(7):1273-81. doi: 10.1097/01.hjh.0000059043.65882.15  
20  
21  
22  
23 7. Wang Z, Chen Z, Zhang L, et al. Status of Hypertension in China: Results from the  
24  
25 China Hypertension Survey, 2012-2015. *Circulation* 2018 doi:  
26  
27 10.1161/circulationaha.117.032380  
28  
29  
30 8. Lu J, Lu Y, Wang X, et al. Prevalence, awareness, treatment, and control of  
31  
32 hypertension in China: data from 1.7 million adults in a population-based screening  
33  
34 study (China PEACE Million Persons Project). *Lancet (London, England)*  
35  
36 2017;390(10112):2549-58. doi: 10.1016/s0140-6736(17)32478-9 [published Online  
37  
38 First: 2017/11/06]  
39  
40  
41  
42 9. Yang G, Wang Y, Zeng Y, et al. Rapid health transition in China, 1990–2010:  
43  
44 findings from the Global Burden of Disease Study 2010. *The Lancet*  
45  
46 2013;381(9882):1987-2015. doi: 10.1016/s0140-6736(13)61097-1  
47  
48  
49  
50 10. Liu LS, & Writing Group of 2010 Chinese Guidelines for the Management of  
51  
52 Hypertension. 2010 Chinese guidelines for the management of hypertension.  
53  
54 *American journal of hypertension* 2012;25(2):271-71. doi: 10.1038/ajh.2011.248  
55  
56  
57  
58  
59  
60

- 1  
2  
3  
4 11. Liu L, Wang D, Wong KS, et al. Stroke and stroke care in China: huge burden,  
5  
6 significant workload, and a national priority. *Stroke* 2011;42(12):3651-4. doi:  
7  
8 10.1161/STROKEAHA.111.635755  
9  
10  
11 12. Blood pressure, cholesterol, and stroke in eastern Asia. Eastern Stroke and  
12  
13 Coronary Heart Disease Collaborative Research Group. *Lancet (London, England)*  
14  
15 1998;352(9143):1801-7. [published Online First: 1998/12/16]  
16  
17  
18 13. Collins R, Peto R, MacMahon S, et al. Blood pressure, stroke, and coronary heart  
19  
20 disease. Part 2, Short-term reductions in blood pressure: overview of randomised drug  
21  
22 trials in their epidemiological context. *Lancet (London, England)*  
23  
24 1990;335(8693):827-38. [published Online First: 1990/04/07]  
25  
26  
27  
28 14. Moran AE, Odden MC, Thanataveerat A, et al. Cost-effectiveness of hypertension  
29  
30 therapy according to 2014 guidelines. *The New England journal of medicine*  
31  
32 2015;372(5):447-55. doi: 10.1056/NEJMsa1406751  
33  
34  
35 15. Penaloza-Ramos MC, Jowett S, Mant J, et al. Cost-effectiveness of  
36  
37 self-management of blood pressure in hypertensive patients over 70 years with  
38  
39 suboptimal control and established cardiovascular disease or additional cardiovascular  
40  
41 risk diseases (TASMIN-SR). *European journal of preventive cardiology*  
42  
43 2016;23(9):902-12. doi: 10.1177/2047487315618784  
44  
45  
46  
47 16. Tsai JC, Yang HY, Wang WH, et al. The Beneficial Effect of Regular Endurance  
48  
49 Exercise Training on Blood Pressure and Quality of Life in Patients with  
50  
51 Hypertension. *Clinical and Experimental Hypertension* 2004;26(3):255-65. doi:  
52  
53 10.1081/ceh-120030234  
54  
55  
56  
57  
58  
59  
60



- 1  
2  
3  
4 17. Wolff M, Sundquist K, Larsson Lonn S, et al. Impact of yoga on blood pressure  
5  
6 and quality of life in patients with hypertension - a controlled trial in primary care,  
7  
8 matched for systolic blood pressure. *BMC cardiovascular disorders* 2013;13:111. doi:  
9  
10 10.1186/1471-2261-13-111 [published Online First: 2013/12/10]  
11  
12  
13 18. Li W, Gu H, Teo KK, et al. Hypertension prevalence, awareness, treatment, and  
14  
15 control in 115 rural and urban communities involving 47 000 people from China.  
16  
17 *Journal of hypertension* 2016;34(1):39-46. doi: 10.1097/hjh.0000000000000745  
18  
19 [published Online First: 2015/12/03]  
20  
21  
22  
23 19. Hesketh T, Zhou X. Hypertension in China: the gap between policy and practice.  
24  
25 *The Lancet* 2017;390(10112):2529-30. doi: 10.1016/s0140-6736(17)32743-5  
26  
27  
28 20. McManus RJ, Mant J, Haque MS, et al. Effect of self-monitoring and medication  
29  
30 self-titration on systolic blood pressure in hypertensive patients at high risk of  
31  
32 cardiovascular disease: the TASMIN-SR randomized clinical trial. *Jama*  
33  
34 2014;312(8):799-808. doi: 10.1001/jama.2014.10057  
35  
36  
37  
38 21. Tucker KL, Sheppard JP, Stevens R, et al. Self-monitoring of blood pressure in  
39  
40 hypertension: A systematic review and individual patient data meta-analysis. *PLoS*  
41  
42 *medicine* 2017;14(9):e1002389. doi: 10.1371/journal.pmed.1002389  
43  
44  
45  
46 22. Koetsenruijter J, van Lieshout J, Vassilev I, et al. Social support systems as  
47  
48 determinants of self-management and quality of life of people with diabetes across  
49  
50 Europe: study protocol for an observational study. *Health and quality of life outcomes*  
51  
52 2014;12(1):29.  
53  
54  
55 23. Ryan P, Sawin KJ. The Individual and Family Self-Management Theory:  
56  
57  
58  
59  
60

- 1  
2  
3 background and perspectives on context, process, and outcomes. *Nurs Outlook*  
4  
5  
6 2009;57(4):217-25 e6. doi: 10.1016/j.outlook.2008.10.004  
7  
8 24. Bodenheimer T, Lorig K, Holman H, et al. Patient self-management of chronic  
9  
10 disease in primary care. *Jama* 2002;288(19):2469-75. [published Online First:  
11  
12 2002/11/19]  
13  
14 25. Bodenheimer T, Wagner EH, Grumbach K. Improving primary care for patients  
15  
16 with chronic illness. *Jama* 2002;288(14):1775-9. [published Online First: 2002/10/09]  
17  
18 26. Grady PA, Gough LL. Self-management: a comprehensive approach to  
19  
20 management of chronic conditions. *American journal of public health*  
21  
22 2014;104(8):e25-31. doi: 10.2105/ajph.2014.302041 [published Online First:  
23  
24 2014/06/13]  
25  
26 27. Halme L, Vesalainen R, Kaaja M, et al. Self-monitoring of blood pressure  
27  
28 promotes achievement of blood pressure target in primary health care. *American*  
29  
30 *journal of hypertension* 2005;18(11):1415-20. doi: 10.1016/j.amjhyper.2005.05.017  
31  
32 28. McManus RJ, Mant J, Roalfe A, et al. Targets and self monitoring in hypertension:  
33  
34 randomised controlled trial and cost effectiveness analysis. *Bmj* 2005;331(7515):493.  
35  
36 doi: 10.1136/bmj.38558.393669.E0  
37  
38 29. Abramson BL, Melvin RG. Cardiovascular risk in women: focus on hypertension.  
39  
40 *The Canadian journal of cardiology* 2014;30(5):553-9. doi:  
41  
42 10.1016/j.cjca.2014.02.014 [published Online First: 2014/05/03]  
43  
44 30. Ong KL, Tso AW, Lam KS, et al. Gender difference in blood pressure control and  
45  
46 cardiovascular risk factors in Americans with diagnosed hypertension. *Hypertension*  
47  
48  
49  
50  
51  
52  
53  
54  
55  
56  
57  
58  
59  
60

1  
2  
3  
4 2008;51(4):1142-8. doi: 10.1161/hypertensionaha.107.105205 [published Online First:  
5  
6 2008/02/09]

7  
8 31. Gu Q, Burt VL, Paulose-Ram R, et al. Gender differences in hypertension  
9  
10 treatment, drug utilization patterns, and blood pressure control among US adults with  
11  
12 hypertension: data from the National Health and Nutrition Examination Survey  
13  
14 1999-2004. *American journal of hypertension* 2008;21(7):789-98. doi:  
15  
16 10.1038/ajh.2008.185 [published Online First: 2008/05/03]  
17  
18

19  
20 32. Everett B, Zajacova A. Gender differences in hypertension and hypertension  
21  
22 awareness among young adults. *Biodemography and social biology* 2015;61(1):1-17.  
23  
24

25  
26 33. Haskell WL, Lee I-M, Pate RR, et al. Physical activity and public health: updated  
27  
28 recommendation for adults from the American College of Sports Medicine and the  
29  
30 American Heart Association. *Circulation* 2007;116(9):1081.  
31  
32

33  
34 34. Gueyffier F, Boutitie F, Boissel J-P, et al. Effect of antihypertensive drug treatment  
35  
36 on cardiovascular outcomes in women and men: a meta-analysis of individual patient  
37  
38 data from randomized, controlled trials. *Annals of Internal Medicine*  
39  
40 1997;126(10):761-67.  
41  
42

43  
44 35. Gahagan J, Gray K, Whynacht A. Sex and gender matter in health research:  
45  
46 addressing health inequities in health research reporting. *International journal for*  
47  
48 *equity in health* 2015;14 doi: 10.1186/s12939-015-0144-4  
49

50  
51 36. Gu Q, Burt VL, Paulose-Ram R, et al. Gender differences in hypertension  
52  
53 treatment, drug utilization patterns, and blood pressure control among US adults with  
54  
55 hypertension: data from the National Health and Nutrition Examination Survey 1999–  
56  
57

1  
2  
3  
4  
5  
6  
7  
8  
9  
10  
11  
12  
13  
14  
15  
16  
17  
18  
19  
20  
21  
22  
23  
24  
25  
26  
27  
28  
29  
30  
31  
32  
33  
34  
35  
36  
37  
38  
39  
40  
41  
42  
43  
44  
45  
46  
47  
48  
49  
50  
51  
52  
53  
54  
55  
56  
57  
58  
59  
60

2004. *American journal of hypertension* 2008;21(7):789-98.

37. Pelletier R, Ditto B, Pilote L. A composite measure of gender and its association with risk factors in patients with premature acute coronary syndrome. *Psychosomatic medicine* 2015;77(5):517-26. doi: 10.1097/psy.000000000000186 [published Online First: 2015/05/20]

38. Johnson JL, Greaves L, Repta R. Better science with sex and gender: Facilitating the use of a sex and gender-based analysis in health research. *International journal for equity in health* 2009;8:14. doi: 10.1186/1475-9276-8-14

39. Smith PM, Koehoorn M. Measuring gender when you don't have a gender measure: constructing a gender index using survey data. *International journal for equity in health* 2016;15:82. doi: 10.1186/s12939-016-0370-4 [published Online First: 2016/05/29]

40. National Health and Family Planning Commission of the People's Republic of China. The Notice of Ministry of Health General Office of the Announcement of the List of National Model Community Health Care Centers in 2011, 2011. <http://www.nhfpc.gov.cn/zwgkzt/wsbysj/201112/53666.shtml> (accessed 24 May, 2018). (In Chinese)

41. National Health and Family Planning Commission of the People's Republic of China. The Notice of Ministry of Health General Office of the Announcement of the List of National Model Community Health Care Centers in 2012, 2012. <http://www.nhfpc.gov.cn/zwgkzt/wsbysj/201211/56380.shtml> (accessed 24 May, 2018). (In Chinese)

1  
2  
3  
4 42. National Health Commission of the People's Republic of China. The Notice of the  
5  
6 General Office of the National Health and Family Planning Commission on the  
7  
8 Announcement of the List of National Model Community Health Care Centers in  
9  
10 2013, 2013.

11  
12  
13 <http://www.nhfpc.gov.cn/jws/s3581r/201310/efaefdd8d2d147fb8781d6bef5ecad53.shtml>  
14  
15 (accessed 24 May, 2018). (In Chinese)

16  
17  
18 43. Haywood K, Lyddiatt A, Brace-McDonnell SJ, et al. Establishing the values for  
19  
20 patient engagement (PE) in health-related quality of life (HRQoL) research: an  
21  
22 international, multiple-stakeholder perspective. *Quality of life research : an*  
23  
24 *international journal of quality of life aspects of treatment, care and rehabilitation*  
25  
26 2017;26(6):1393-404. doi: 10.1007/s11136-016-1465-5 [published Online First:  
27  
28 2016/12/10]

29  
30  
31  
32 44. Canadian Institutes of Health Research (CIHR). Strategy for Patient-Oriented  
33  
34 Research Patient Engagement Framework, 2015.

35  
36  
37 <http://www.cihr-irsc.gc.ca/e/48413.html> (accessed 1 August, 2018).

38  
39  
40 45. The Central People's Government of the People's Republic of China. Decision of  
41  
42 the Standing Committee of the National People's Congress Regarding the Amendment  
43  
44 to the Individual Income Tax Law of the People's Republic of China, 2011.

45  
46  
47 [http://www.gov.cn/flfg/2011-07/01/content\\_1897307.htm](http://www.gov.cn/flfg/2011-07/01/content_1897307.htm) (accessed 24 May 2018). (In  
48  
49 Chinese)

50  
51  
52 46. Zhou B-F, Cooperative Meta-Analysis Group of the Working Group on Obesity in  
53  
54 C. Predictive values of body mass index and waist circumference for risk factors of  
55  
56

1  
2  
3 certain related diseases in Chinese adults--study on optimal cut-off points of body  
4 mass index and waist circumference in Chinese adults. *Biomedical and environmental*  
5  
6  
7  
8  
9  
10  
11  
12  
13  
14  
15  
16  
17  
18  
19  
20  
21  
22  
23  
24  
25  
26  
27  
28  
29  
30  
31  
32  
33  
34  
35  
36  
37  
38  
39  
40  
41  
42  
43  
44  
45  
46  
47  
48  
49  
50  
51  
52  
53  
54  
55  
56  
57  
58  
59  
60

certain related diseases in Chinese adults--study on optimal cut-off points of body mass index and waist circumference in Chinese adults. *Biomedical and environmental sciences* : *BES* 2002;15(1):83-96.

47. Zhou BF. Effect of body mass index on all-cause mortality and incidence of cardiovascular diseases--report for meta-analysis of prospective studies open optimal cut-off points of body mass index in Chinese adults. *Biomedical and environmental sciences* : *BES* 2002;15(3):245-52. [published Online First: 2002/12/26]

48. Chen C, Lu FC. The guidelines for prevention and control of overweight and obesity in Chinese adults. *Biomedical and environmental sciences* : *BES* 2004;17 Suppl:1-36. [published Online First: 2005/04/06]

49. Alberti KG, Zimmet P, Shaw J. International Diabetes Federation: a consensus on Type 2 diabetes prevention. *Diabetic medicine : a journal of the British Diabetic Association* 2007;24(5):451-63. doi: 10.1111/j.1464-5491.2007.02157.x [published Online First: 2007/05/02]

50. National Institute for Health and Care Excellence. BMI: preventing ill health and premature death in black, Asian and other minority ethnic groups, 2013. <https://www.nice.org.uk/guidance/ph46/chapter/1-Recommendations> (accessed 23 July, 2018).

51. Liu N, Zhang J, Yu X, et al. Development and testing of reliability and validity of self-management scale for patients with hypertension 高血压病人自我管理量表的研制与信效度检验. *Hu Li Yan Jiu 护理研究: 中旬版* 2015;29(5):1764-67. (In Chinese)

- 1  
2  
3  
4 52. Liu L. 2010 Chinese guidelines for the management of hypertension. *Zhonghua*  
5  
6 *xin xue guan bing za zhi* 2011;39(7):579-615.  
7  
8  
9 53. Sedgwick P. Cross sectional studies: advantages and disadvantages. *BMJ: British*  
10  
11 *Medical Journal (Online)* 2014;348  
12  
13 54. Palmer PB, O'Connell DG. Regression Analysis for Prediction: Understanding the  
14  
15 Process. *Cardiopulmonary Physical Therapy Journal* 2009;20(3):23-6.  
16  
17  
18 55. Abegaz TM, Shehab A, Gebreyohannes EA, et al. Nonadherence to  
19  
20 antihypertensive drugs: a systematic review and meta-analysis. *Medicine* 2017;96(4)  
21  
22  
23 56. Paulsen MS, Andersen M, Munck AP, et al. Socio-economic status influences  
24  
25 blood pressure control despite equal access to care. *Fam Pract* 2012;29(5):503-10. doi:  
26  
27 10.1093/fampra/cm130 [published Online First: 2012/01/12]  
28  
29  
30 57. Leng B, Jin Y, Li G, et al. Socioeconomic status and hypertension: a meta-analysis.  
31  
32 *Journal of hypertension* 2015;33(2):221-29.  
33  
34  
35 58. Moser KA, Agrawal S, Smith GD, et al. Socio-demographic inequalities in the  
36  
37 prevalence, diagnosis and management of hypertension in India: analysis of  
38  
39 nationally-representative survey data. *PloS one* 2014;9(1):e86043.  
40  
41  
42 59. Feng XL, Pang M, Beard J. Health system strengthening and hypertension  
43  
44 awareness, treatment and control: data from the China Health and Retirement  
45  
46 Longitudinal Study. *Bulletin of the World Health Organization* 2014;92(1):29-41. doi:  
47  
48 10.2471/BLT.13.124495  
49  
50  
51  
52 60. Liu GG, Vortherms SA, Hong X. China's Health Reform Update. *Annual Review*  
53  
54 *of Public Health* 2017;38(1):431-48. doi:

1  
2  
3  
4 10.1146/annurev-publhealth-031816-044247

5  
6 61. Liu J, Shi L, Meng Q, et al. Income-related inequality in health insurance  
7  
8 coverage: analysis of China Health and Nutrition Survey of 2006 and 2009.

9  
10  
11 *International journal for equity in health* 2012;11(1):42. doi:

12  
13 10.1186/1475-9276-11-42

14  
15  
16 62. Duru OK, Vargas RB, Kermah D, et al. Health Insurance Status and Hypertension  
17  
18 Monitoring and Control in the United States. *American journal of hypertension*

19  
20 2007;20(4):348-53. doi: 10.1016/j.amjhyper.2006.11.007

21  
22  
23 63. Lai Y-J, Chen H-C, Chou P. Gender Difference in the Interaction Effects of  
24  
25 Diabetes and Hypertension on Stroke among the Elderly in the Shih-Pai Study,

26  
27 Taiwan. *PloS one* 2015;10(8):e0136634. doi: 10.1371/journal.pone.0136634

28  
29  
30 64. Choi HM, Kim HC, Kang DR. Sex differences in hypertension prevalence and  
31  
32 control: Analysis of the 2010-2014 Korea National Health and Nutrition Examination

33  
34 Survey. *PloS one* 2017;12(5):e0178334. doi: 10.1371/journal.pone.0178334

35  
36  
37 65. Heo S, Moser DK, Lennie TA, et al. Gender differences in and factors related to  
38  
39 self-care behaviors: a cross-sectional, correlational study of patients with heart failure.

40  
41  
42 *Int J Nurs Stud* 2008;45(12):1807-15. doi: 10.1016/j.ijnurstu.2008.05.008 [published

43  
44 Online First: 2008/08/05]

45  
46  
47 66. Canadian Institutes of Health Research (CIHR). How to integrate sex and gender  
48  
49 into research, 2018. <http://www.cihr-irsc.gc.ca/e/50836.html> (accessed 23 July 2018).

50  
51  
52 67. Rahman M, Williams G, Al Mamun A. Gender differences in hypertension

53  
54 awareness, antihypertensive use and blood pressure control in Bangladeshi adults:



- findings from a national cross-sectional survey. *Journal of Health, Population and Nutrition* 2017;36(1):23.
68. Chu SH, Baek JW, Kim ES, et al. Gender differences in hypertension control among older Korean adults: Korean social life, health, and aging project. *Journal of Preventive Medicine and Public Health* 2015;48(1):38.
69. Violán C, Foguet-Boreu Q, Roso-Llorach A, et al. Burden of multimorbidity, socioeconomic status and use of health services across stages of life in urban areas: a cross-sectional study. *BMC public health* 2014;14(1):530.
70. Noh J, Kim HC, Shin A, et al. Prevalence of Comorbidity among People with Hypertension: The Korea National Health and Nutrition Examination Survey 2007-2013. *Korean circulation journal* 2016;46(5):672-80.
71. Chriss PM, Sheposh J, Carlson B, et al. Predictors of successful heart failure self-care maintenance in the first three months after hospitalization. *Heart & lung : the journal of critical care* 2004;33(6):345-53. [published Online First: 2004/12/15]
72. Ma C. A cross-sectional survey of medication adherence and associated factors for rural patients with hypertension. *Applied Nursing Research* 2016;31:94-99.
73. Li YT, Wang HH, Liu KQ, et al. Medication adherence and blood pressure control among hypertensive patients with coexisting long-term conditions in primary care settings: A cross-sectional analysis. *Medicine* 2016;95(20)
74. Ryan P, Sawin KJ. The Individual and Family Self-Management Theory: Background and perspectives on context, process, and outcomes. *Nursing Outlook* 2009;57(4):217-25.e6. doi: <https://doi.org/10.1016/j.outlook.2008.10.004>

- 1  
2  
3 75. Chobanian AV, Bakris GL, Black HR, et al. Seventh report of the Joint National  
4 Committee on Prevention, Detection, Evaluation, and Treatment of High Blood  
5 Pressure. *Hypertension* 2003;42(6):1206-52. doi:  
6  
7  
8  
9 10.1161/01.HYP.0000107251.49515.c2 [published Online First: 2003/12/06]  
10  
11  
12  
13 76. Nguyen QC, Needham Waddell E, Kerker BD, et al. Awareness, Treatment, and  
14 Control of Hypertension and Hypercholesterolemia Among Insured Residents of New  
15 York City, 2004. *Preventing chronic disease* 2011;8(5)  
16  
17  
18  
19  
20 77. Wogen J. Patient adherence with hypertension medication. *Journal of Managed*  
21  
22  
23  
24  
25  
26 78. Morisky DE, Ang A, Krousel - Wood M, et al. Predictive validity of a medication  
27 adherence measure in an outpatient setting. *The Journal of Clinical Hypertension*  
28  
29  
30  
31 2008;10(5):348-54.  
32  
33 79. King-Shier KM, Singh S, Khan NA, et al. Ethno-Cultural Considerations in  
34 Cardiac Patients' Medication Adherence. *Clinical nursing research* 2017;26(5):576-91.  
35  
36  
37  
38  
39  
40  
41 80. Hsu Y-H, Mao C-L, Wey M. Antihypertensive medication adherence among  
42 elderly Chinese Americans. *Journal of Transcultural Nursing* 2010;21(4):297-305.  
43  
44  
45 81. Li W-W, Stewart AL, Stotts N, et al. Cultural factors associated with  
46  
47  
48  
49  
50  
51  
52  
53 82. Gu J, Zhang X-J, Wang T-H, et al. Hypertension knowledge, awareness, and  
54  
55  
56  
57  
58  
59  
60

1  
2  
3 Xuhui District, Shanghai, China. *Cardiology* 2014;127(2):96-104.  
4

5  
6 83. McManus RJ, Mant J, Haque MS, et al. Effect of self-monitoring and medication  
7  
8 self-titration on systolic blood pressure in hypertensive patients at high risk of  
9  
10 cardiovascular disease: the TASMIN-SR randomized clinical trial. *Jama*  
11  
12 2014;312(8):799-808.  
13  
14

15  
16 84. Stergiou GS, Kollias A, Zeniodi M, et al. Home blood pressure monitoring:  
17  
18 primary role in hypertension management. *Current hypertension reports*  
19  
20 2014;16(8):462.  
21  
22

23  
24 85. Zhou H, Wang K, Zhou X, et al. Prevalence and Gender-Specific Influencing  
25  
26 Factors of Hypertension among Chinese Adults: A Cross-Sectional Survey Study in  
27  
28 Nanchang, China. *International journal of environmental research and public health*  
29  
30 2018;15(2) doi: 10.3390/ijerph15020382 [published Online First: 2018/02/24]  
31  
32

33  
34 86. Briasoulis A, Agarwal V, Messerli FH. Alcohol consumption and the risk of  
35  
36 hypertension in men and women: a systematic review and meta - analysis. *The*  
37  
38 *Journal of Clinical Hypertension* 2012;14(11):792-98.  
39  
40  
41  
42  
43  
44  
45  
46  
47  
48  
49  
50  
51  
52  
53  
54  
55  
56  
57  
58  
59  
60

**Table 1 Characteristics of community participants with hypertension**

|                         | <b>Total</b>   | <b>Men</b>     | <b>Women</b>   | <b>p Value</b> |
|-------------------------|----------------|----------------|----------------|----------------|
|                         | <b>(n=873)</b> | <b>(n=360)</b> | <b>(n=513)</b> |                |
|                         | <b>n (%)</b>   | <b>n (%)</b>   | <b>n (%)</b>   |                |
| <b>Marriage Status</b>  |                |                |                | <0.001         |
| Married                 | 757 (86.7)     | 346 (96.1)     | 411 (80.1)     |                |
| Single/Divorced/Widowed | 116 (13.3)     | 14 (3.9)       | 102 (19.9)     |                |
| <b>Education</b>        |                |                |                | <0.001         |
| Primary school or no    | 183 (21.0)     | 53 (14.7)      | 130 (25.3)     |                |
| High school             | 544 (62.3)     | 232 (64.4)     | 312 (60.8)     |                |
| College or higher       | 146 (16.7)     | 75 (20.8)      | 71 (13.8)      |                |
| <b>Employment</b>       |                |                |                | <0.001         |
| Employed                | 145 (16.6)     | 91 (25.3)      | 54 (10.5)      |                |
| Unemployed              | 132 (15.1)     | 44 (12.2)      | 88 (17.2)      |                |
| Retired                 | 596 (68.3)     | 225 (62.5)     | 371 (72.3)     |                |
| <b>Personal Incomes</b> |                |                |                | <0.001         |
| ≤ ¥1500 (US\$225)       | 307 (35.2)     | 94 (26.1)      | 213 (41.5)     |                |
| > ¥1500 (US\$225)       | 566 (64.8)     | 266 (73.9)     | 300 (58.5)     |                |
| <b>Health Insurance</b> |                |                |                | 0.170          |
| UEMI                    | 636 (72.9)     | 271 (75.3)     | 365 (71.2)     |                |
| URMI                    | 103 (11.8)     | 32 (8.9)       | 71 (13.8)      |                |

|    |                   |            |            |            |        |
|----|-------------------|------------|------------|------------|--------|
| 1  |                   |            |            |            |        |
| 2  |                   |            |            |            |        |
| 3  |                   |            |            |            |        |
| 4  | NCMS              | 100 (11.5) | 43 (11.9)  | 57 (11.1)  |        |
| 5  |                   |            |            |            |        |
| 6  | Uninsured         | 34 (3.9)   | 14 (3.9)   | 20 (3.9)   |        |
| 7  |                   |            |            |            |        |
| 8  | BMI               |            |            |            |        |
| 9  |                   |            |            |            |        |
| 10 |                   |            |            |            |        |
| 11 | Underweight       | 10 (1.1)   | 2 (0.6)    | 8 (1.6)    | 0.377  |
| 12 |                   |            |            |            |        |
| 13 | Normal            | 304 (34.8) | 120 (33.3) | 184 (35.9) |        |
| 14 |                   |            |            |            |        |
| 15 | Overweight        | 412 (47.2) | 178 (49.4) | 234 (45.6) |        |
| 16 |                   |            |            |            |        |
| 17 | Obese             | 147 (16.8) | 60 (16.7)  | 87 (17.0)  |        |
| 18 |                   |            |            |            |        |
| 19 |                   |            |            |            |        |
| 20 | WC                |            |            |            |        |
| 21 |                   |            |            |            |        |
| 22 |                   |            |            |            |        |
| 23 | Normal            | 229 (26.2) | 144 (40.0) | 85 (16.6)  | <0.001 |
| 24 |                   |            |            |            |        |
| 25 | Obese             | 644 (73.8) | 216 (60.0) | 428 (83.4) |        |
| 26 |                   |            |            |            |        |
| 27 |                   |            |            |            |        |
| 28 | Smoking Status    |            |            |            | <0.001 |
| 29 |                   |            |            |            |        |
| 30 | Smoking           | 239 (27.4) | 216 (60.0) | 23 (4.5)   |        |
| 31 |                   |            |            |            |        |
| 32 | Non-smoking       | 634 (72.6) | 144 (40.0) | 490 (95.5) |        |
| 33 |                   |            |            |            |        |
| 34 |                   |            |            |            |        |
| 35 | Drinking Status   |            |            |            | <0.001 |
| 36 |                   |            |            |            |        |
| 37 | Drinking          | 196 (22.5) | 176 (48.9) | 20 (3.9)   |        |
| 38 |                   |            |            |            |        |
| 39 | Non-drinking      | 677 (77.5) | 184 (51.1) | 493 (96.1) |        |
| 40 |                   |            |            |            |        |
| 41 |                   |            |            |            |        |
| 42 | Family History    |            |            |            | 0.944  |
| 43 |                   |            |            |            |        |
| 44 | Yes               | 533 (61.1) | 219 (60.8) | 314 (61.2) |        |
| 45 |                   |            |            |            |        |
| 46 | No                | 340 (38.9) | 141 (39.2) | 199 (38.8) |        |
| 47 |                   |            |            |            |        |
| 48 |                   |            |            |            |        |
| 49 | Comorbidities     |            |            |            |        |
| 50 |                   |            |            |            |        |
| 51 |                   |            |            |            |        |
| 52 | CAD               | 195 (22.3) | 75 (20.8)  | 120 (23.4) | 0.370  |
| 53 |                   |            |            |            |        |
| 54 | Back/Neck problem | 97 (11.1)  | 27 (7.5)   | 70 (13.6)  | 0.004  |
| 55 |                   |            |            |            |        |
| 56 |                   |            |            |            |        |
| 57 |                   |            |            |            |        |
| 58 |                   |            |            |            |        |
| 59 |                   |            |            |            |        |
| 60 |                   |            |            |            |        |

|                          |            |            |            |       |
|--------------------------|------------|------------|------------|-------|
| Stroke                   | 96 (11.0)  | 44 (12.2)  | 52 (10.1)  | 0.334 |
| Diabetes                 | 91 (10.4)  | 35 (9.7)   | 56 (10.9)  | 0.569 |
| Arthritis                | 61 (7.0)   | 18 (5.0)   | 43 (8.4)   | 0.049 |
| COPD                     | 55 (6.3)   | 24 (6.7)   | 31 (6.0)   | 0.710 |
| MI                       | 17 (1.9)   | 10 (2.8)   | 7 (1.4)    | 0.141 |
| Nephropathy              | 11 (1.3)   | 7 (1.9)    | 4 (0.8)    | 0.132 |
| Gastrointestinal disease | 10 (1.1)   | 5 (1.4)    | 5 (1.0)    | 0.574 |
| 0                        | 401 (45.9) | 184 (51.1) | 217 (42.3) | 0.010 |
| ≥1                       | 472 (54.1) | 176 (48.9) | 296 (57.7) |       |
| BP Control               |            |            |            | 0.242 |
| Good control             | 287 (32.9) | 110 (30.6) | 177 (34.5) |       |
| Poor control             | 586 (67.1) | 250 (69.4) | 336 (65.5) |       |

UEMI, urban employees' medical insurance; URMI, urban residents' medical insurance; NCMS, new rural cooperative medical scheme; BMI, body mass index; WC, waist circumference; CAD, coronary artery disease; COPD, chronic obstructive pulmonary disease; MI, myocardial infarction; BP, blood pressure.

**Table 2** Difference in self-management processes in community participants with hypertension

|                                        | <b>Total</b>   | <b>Men</b>     | <b>Women</b>   | <b>p Value</b> |
|----------------------------------------|----------------|----------------|----------------|----------------|
|                                        | <b>(n=873)</b> | <b>(n=360)</b> | <b>(n=513)</b> |                |
|                                        | Mean (SD)      | Mean (SD)      | Mean (SD)      |                |
| Treatment Management                   | 59.54 (17.43)  | 59.49 (18.01)  | 59.58 (17.02)  | 0.937          |
| Diet Management                        | 70.18 (23.36)  | 67.71 (24.18)  | 71.91 (22.63)  | 0.009          |
| Physical Exercise Management           | 60.80 (32.69)  | 59.63 (33.21)  | 61.62 (32.33)  | 0.377          |
| Lifestyle Management                   | 63.47 (18.38)  | 64.92 (17.91)  | 62.45 (18.66)  | 0.051          |
| Risk Factors Management                | 86.91 (24.64)  | 73.70 (30.53)  | 96.18 (13.12)  | <0.001         |
| Total Score                            | 65.58 (13.22)  | 63.61 (14.28)  | 66.96 (12.25)  | <0.001         |
| No. of Visiting CHC (year), n (%)      |                |                |                | 0.060          |
| 0                                      | 322 (36.9)     | 146 (40.6)     | 176 (34.3)     |                |
| ≥1                                     | 551 (63.1)     | 214 (59.4)     | 337 (65.7)     |                |
| No. of Visiting Hospital (year), n (%) |                |                |                | 0.001          |
| 0                                      | 653 (74.8)     | 290 (80.6)     | 363 (70.8)     |                |
| ≥1                                     | 220 (25.2)     | 70 (19.4)      | 150 (29.2)     |                |

CHC, Community health centers.

**Table 3** Logistic regression of blood pressure control among community participants with hypertension

|                               | Model 1 |      |      | Model 2 |      |      | Model 3 |       |      |      |      |       |
|-------------------------------|---------|------|------|---------|------|------|---------|-------|------|------|------|-------|
|                               | OR      | CI   | p    | OR      | CI   | p    | OR      | CI    | p    |      |      |       |
| Age (year)                    | 1.00    | 0.98 | 1.02 | 0.979   | 0.99 | 0.98 | 1.01    | 0.561 | 1.00 | 0.98 | 1.02 | 0.639 |
| Sex (vs. male)                | 0.76    | 0.55 | 1.04 | 0.083   | 0.86 | 0.56 | 1.30    | 0.468 | 0.81 | 0.52 | 1.25 | 0.336 |
| Marital Status (vs. married)  | 1.27    | 0.79 | 2.01 | 0.322   | 1.25 | 0.78 | 2.00    | 0.355 | 1.19 | 0.73 | 1.93 | 0.480 |
| Education                     |         |      |      | 0.224   |      |      |         | 0.370 |      |      |      | 0.501 |
| High school (vs. college)     | 1.21    | 0.82 | 1.78 | 0.337   | 1.17 | 0.79 | 1.73    | 0.430 | 1.11 | 0.74 | 1.66 | 0.617 |
| Primary school (vs. college)  | 1.60    | 0.94 | 2.72 | 0.084   | 1.48 | 0.86 | 2.55    | 0.159 | 1.39 | 0.80 | 2.41 | 0.249 |
| Employment                    |         |      |      | 0.156   |      |      |         | 0.139 |      |      |      | 0.209 |
| Unemployed (vs. employed)     | 0.87    | 0.45 | 1.68 | 0.676   | 0.90 | 0.46 | 1.75    | 0.747 | 0.87 | 0.44 | 1.73 | 0.695 |
| Retired (vs. employed)        | 0.65    | 0.41 | 1.02 | 0.062   | 0.64 | 0.40 | 1.02    | 0.059 | 0.66 | 0.41 | 1.06 | 0.088 |
| Personal Income (vs. >¥1500 ) | 1.55    | 1.06 | 2.25 | 0.024   | 1.61 | 1.10 | 2.36    | 0.015 | 1.50 | 1.02 | 2.22 | 0.042 |



1  
2  
3  
4  
5  
6  
7  
8  
9  
10  
11  
12  
13  
14  
15  
16  
17  
18  
19  
20  
21  
22  
23  
24  
25  
26  
27  
28  
29  
30  
31  
32  
33  
34  
35  
36  
37  
38  
39  
40  
41  
42  
43  
44  
45  
46  
47

|                            |      |      |      |       |      |      |      |       |      |      |      |       |
|----------------------------|------|------|------|-------|------|------|------|-------|------|------|------|-------|
| Health Insurance           |      |      |      | 0.076 |      |      |      | 0.084 |      |      |      | 0.187 |
| URMI (vs. UEMI)            | 1.12 | 0.69 | 1.81 | 0.661 | 1.08 | 0.66 | 1.77 | 0.761 | 0.96 | 0.57 | 1.59 | 0.859 |
| NCMS (vs. UEMI)            | 2.67 | 1.27 | 5.60 | 0.009 | 2.65 | 1.26 | 5.60 | 0.011 | 2.22 | 1.05 | 4.72 | 0.037 |
| Uninsured (vs. UEMI)       | 1.39 | 0.56 | 3.41 | 0.476 | 1.31 | 0.53 | 3.25 | 0.558 | 1.16 | 0.46 | 2.90 | 0.750 |
| BMI (kg/m <sup>2</sup> )   |      |      |      |       | 1.01 | 0.95 | 1.06 | 0.831 | 1.00 | 0.95 | 1.06 | 0.932 |
| WC (vs. normal)            |      |      |      |       | 1.11 | 0.75 | 1.66 | 0.596 | 1.10 | 0.73 | 1.65 | 0.648 |
| Smoking (vs. non-smoker)   |      |      |      |       | 1.39 | 0.87 | 2.22 | 0.165 | 1.53 | 0.93 | 2.51 | 0.094 |
| Drinking (vs. no-drinking) |      |      |      |       | 1.02 | 0.64 | 1.61 | 0.937 | 0.94 | 0.57 | 1.55 | 0.807 |
| Family History (vs. no)    |      |      |      |       | 0.85 | 0.62 | 1.16 | 0.298 | 0.90 | 0.65 | 1.23 | 0.505 |
| Disease Duration (year)    |      |      |      |       | 1.03 | 1.01 | 1.04 | 0.006 | 1.03 | 1.01 | 1.04 | 0.009 |
| Comorbidities (vs. no)     |      |      |      |       | 1.12 | 0.83 | 1.53 | 0.463 | 1.13 | 0.82 | 1.55 | 0.450 |
| Treatment Management       |      |      |      |       |      |      |      |       | 0.98 | 0.97 | 0.99 | 0.000 |
| Diet Management            |      |      |      |       |      |      |      |       | 1.00 | 0.99 | 1.01 | 0.628 |

|                                 |          |       |          |       |          |       |      |       |
|---------------------------------|----------|-------|----------|-------|----------|-------|------|-------|
| Physical Exercise Management    |          |       |          |       | 1.00     | 0.99  | 1.00 | 0.616 |
| Lifestyle Management            |          |       |          |       | 1.00     | 0.99  | 1.01 | 0.474 |
| Risk Factor Management          |          |       |          |       | 1.00     | 1.00  | 1.01 | 0.395 |
| No. of Visiting CHC (year)      |          |       |          |       | 1.01     | 0.98  | 1.03 | 0.682 |
| No. of Visiting Hospital (year) |          |       |          |       | 0.99     | 0.92  | 1.07 | 0.780 |
| Chi-square                      | 55.649   | df=11 | 68.547   | df=18 | 93.214   | df=25 |      |       |
| $\Delta$ Chi-square             | 55.649   | df=11 | 12.898   | df=7  | 24.668   | df=7  |      |       |
| -2 Loglikelihood                | 1050.077 |       | 1037.179 |       | 1012.512 |       |      |       |

UEMI, urban employees' medical insurance; URMI, urban residents' medical insurance; NCMS, new rural cooperative medical scheme; BMI, body mass index; WC, waist circumference; CHC, community health centers.

1  
2  
3  
4  
5  
6  
7  
8  
9  
10  
11  
12  
13  
14  
15  
16  
17  
18  
19  
20  
21  
22  
23  
24  
25  
26  
27  
28  
29  
30  
31  
32  
33  
34  
35  
36  
37  
38  
39  
40  
41  
42  
43  
44  
45  
46  
47  
48  
49  
50  
51  
52  
53  
54  
55  
56  
57  
58  
59  
60

**Figure Legend**

*Figure 1.* A flowchart of included and excluded cases.

For peer review only

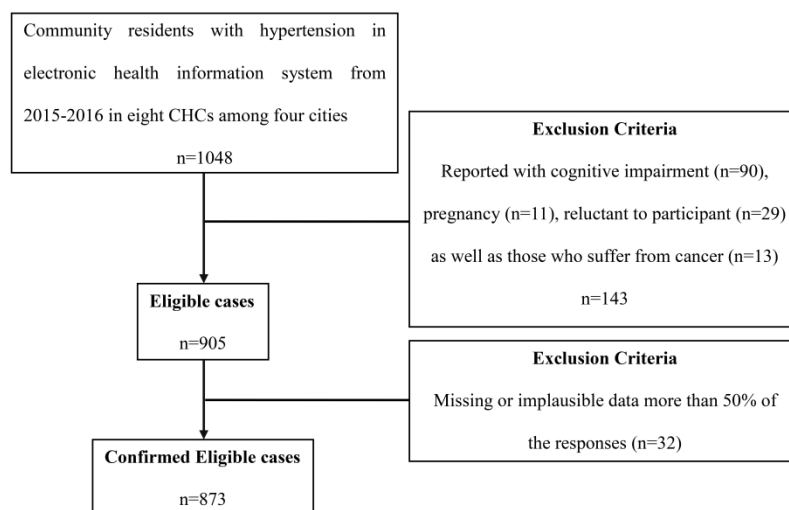

Figure 1. A flowchart of included and excluded cases.

1  
2  
3  
4  
5  
6  
7  
8  
9  
10  
11  
12  
13  
14  
15  
16  
17  
18  
19  
20  
21  
22  
23  
24  
25  
26  
27  
28  
29  
30  
31  
32  
33  
34  
35  
36  
37  
38  
39  
40  
41  
42  
43  
44  
45  
46

**Translation of self-management scale for patients with hypertension**

| <b>Self-management Scale for Patients with Hypertension</b> |                                                                                                                 |              |                     |                  |                               |               |
|-------------------------------------------------------------|-----------------------------------------------------------------------------------------------------------------|--------------|---------------------|------------------|-------------------------------|---------------|
|                                                             |                                                                                                                 | <b>Never</b> | <b>Occasionally</b> | <b>Sometimes</b> | <b>Frequently<br/>(Often)</b> | <b>Always</b> |
|                                                             | <b>Treatment Management</b>                                                                                     |              |                     |                  |                               |               |
| 1                                                           | Check your blood pressure                                                                                       |              |                     |                  |                               |               |
| 2                                                           | Visiting a doctor when the blood pressure fluctuates too much                                                   |              |                     |                  |                               |               |
| 3                                                           | Take medications as prescribed                                                                                  |              |                     |                  |                               |               |
| 4                                                           | Use a method to help you remember to take your medications on time<br>(e.g., use a pill box or other reminders) |              |                     |                  |                               |               |
| 5                                                           | Keep doctor or nurse appointments                                                                               |              |                     |                  |                               |               |
| 6                                                           | Adjusting antihypertensive medications yourself at home based on the<br>level of blood pressure                 |              |                     |                  |                               |               |

|    |                                                                                         |  |  |  |  |  |
|----|-----------------------------------------------------------------------------------------|--|--|--|--|--|
| 7  | Forget to take antihypertensive medications                                             |  |  |  |  |  |
| 8  | Buy and take antihypertensive medications from recommendation of friends or advertising |  |  |  |  |  |
|    | <b>Diet Management</b>                                                                  |  |  |  |  |  |
| 9  | Eat your meals on time and eat a balanced meal.                                         |  |  |  |  |  |
| 10 | Eat a low-salt diet (eat 6 grams or less than 6 grams of salt daily)                    |  |  |  |  |  |
|    | <b>Physical Exercise Management</b>                                                     |  |  |  |  |  |
| 11 | Choose an appropriate exercise (e.g., jogging, Tai Chi, etc.)                           |  |  |  |  |  |
| 12 | Exercise more than 3 days per week, longer than 30 minutes each time                    |  |  |  |  |  |
| 13 | Exercise at least 30 minutes after your meal                                            |  |  |  |  |  |
|    | <b>Lifestyle Management</b>                                                             |  |  |  |  |  |
| 14 | Get adequate sleep                                                                      |  |  |  |  |  |
| 15 | Maintain a healthy bowel regime (i.e., maintain regular bowel habits)                   |  |  |  |  |  |

1  
2  
3  
4  
5  
6  
7  
8  
9  
10  
11  
12  
13  
14  
15  
16  
17  
18  
19  
20  
21  
22  
23  
24  
25  
26  
27  
28  
29  
30  
31  
32  
33  
34  
35  
36  
37  
38  
39  
40  
41  
42  
43  
44  
45  
46

|    |                                                              |  |  |  |  |  |
|----|--------------------------------------------------------------|--|--|--|--|--|
|    | or normal bowel movements)                                   |  |  |  |  |  |
| 16 | Engage in social activities                                  |  |  |  |  |  |
| 17 | Try to lose weight or control body weight                    |  |  |  |  |  |
| 18 | Keep your mood stable                                        |  |  |  |  |  |
|    | <b>Risk Factor Management</b>                                |  |  |  |  |  |
| 19 | Smoking                                                      |  |  |  |  |  |
| 20 | Drinking (daily amount of alcohol intake more than 25 grams) |  |  |  |  |  |
| 21 | Overstrained or excessive pressure at work                   |  |  |  |  |  |

**STROBE 2007 (v4) Statement—Checklist of items that should be included in reports of *cross-sectional studies***

| Section/Topic                | Item # | Recommendation                                                                                                                                                                       | Reported on page # |
|------------------------------|--------|--------------------------------------------------------------------------------------------------------------------------------------------------------------------------------------|--------------------|
| <b>Title and abstract</b>    | 1      | (a) Indicate the study's design with a commonly used term in the title or the abstract                                                                                               | 1                  |
|                              |        | (b) Provide in the abstract an informative and balanced summary of what was done and what was found                                                                                  | 2-3                |
| <b>Introduction</b>          |        |                                                                                                                                                                                      |                    |
| Background/rationale         | 2      | Explain the scientific background and rationale for the investigation being reported                                                                                                 | 4-6                |
| Objectives                   | 3      | State specific objectives, including any prespecified hypotheses                                                                                                                     | 6-7                |
| <b>Methods</b>               |        |                                                                                                                                                                                      |                    |
| Study design                 | 4      | Present key elements of study design early in the paper                                                                                                                              | 7                  |
| Setting                      | 5      | Describe the setting, locations, and relevant dates, including periods of recruitment, exposure, follow-up, and data collection                                                      | 7                  |
| Participants                 | 6      | (a) Give the eligibility criteria, and the sources and methods of selection of participants                                                                                          | 7-8                |
| Variables                    | 7      | Clearly define all outcomes, exposures, predictors, potential confounders, and effect modifiers. Give diagnostic criteria, if applicable                                             | 8-10               |
| Data sources/<br>measurement | 8*     | For each variable of interest, give sources of data and details of methods of assessment (measurement). Describe comparability of assessment methods if there is more than one group | 8-10               |
| Bias                         | 9      | Describe any efforts to address potential sources of bias                                                                                                                            | 10                 |
| Study size                   | 10     | Explain how the study size was arrived at                                                                                                                                            | 11                 |
| Quantitative variables       | 11     | Explain how quantitative variables were handled in the analyses. If applicable, describe which groupings were chosen and why                                                         | 11-12              |
| Statistical methods          | 12     | (a) Describe all statistical methods, including those used to control for confounding                                                                                                | 11-12              |
|                              |        | (b) Describe any methods used to examine subgroups and interactions                                                                                                                  | N/A                |
|                              |        | (c) Explain how missing data were addressed                                                                                                                                          | 12                 |
|                              |        | (d) If applicable, describe analytical methods taking account of sampling strategy                                                                                                   | N/A                |
|                              |        | (e) Describe any sensitivity analyses                                                                                                                                                | N/A                |
| <b>Results</b>               |        |                                                                                                                                                                                      |                    |



|                          |     |                                                                                                                                                                                                              |                 |
|--------------------------|-----|--------------------------------------------------------------------------------------------------------------------------------------------------------------------------------------------------------------|-----------------|
| Participants             | 13* | (a) Report numbers of individuals at each stage of study—eg numbers potentially eligible, examined for eligibility, confirmed eligible, included in the study, completing follow-up, and analysed            | 12              |
|                          |     | (b) Give reasons for non-participation at each stage                                                                                                                                                         | 12              |
|                          |     | (c) Consider use of a flow diagram                                                                                                                                                                           | 12 (Figure 1)   |
| Descriptive data         | 14* | (a) Give characteristics of study participants (eg demographic, clinical, social) and information on exposures and potential confounders                                                                     | 12-13 (Table 1) |
|                          |     | (b) Indicate number of participants with missing data for each variable of interest                                                                                                                          | N/A             |
| Outcome data             | 15* | Report numbers of outcome events or summary measures                                                                                                                                                         | 13-14           |
| Main results             | 16  | (a) Give unadjusted estimates and, if applicable, confounder-adjusted estimates and their precision (eg, 95% confidence interval). Make clear which confounders were adjusted for and why they were included | N/A             |
|                          |     | (b) Report category boundaries when continuous variables were categorized                                                                                                                                    | N/A             |
|                          |     | (c) If relevant, consider translating estimates of relative risk into absolute risk for a meaningful time period                                                                                             | N/A             |
| Other analyses           | 17  | Report other analyses done—eg analyses of subgroups and interactions, and sensitivity analyses                                                                                                               | N/A             |
| <b>Discussion</b>        |     |                                                                                                                                                                                                              |                 |
| Key results              | 18  | Summarise key results with reference to study objectives                                                                                                                                                     | 14-18           |
| Limitations              | 19  | Discuss limitations of the study, taking into account sources of potential bias or imprecision. Discuss both direction and magnitude of any potential bias                                                   | 18              |
| Interpretation           | 20  | Give a cautious overall interpretation of results considering objectives, limitations, multiplicity of analyses, results from similar studies, and other relevant evidence                                   | 14-18           |
| Generalisability         | 21  | Discuss the generalisability (external validity) of the study results                                                                                                                                        | 19              |
| <b>Other information</b> |     |                                                                                                                                                                                                              |                 |
| Funding                  | 22  | Give the source of funding and the role of the funders for the present study and, if applicable, for the original study on which the present article is based                                                | 20              |

\*Give information separately for cases and controls in case-control studies and, if applicable, for exposed and unexposed groups in cohort and cross-sectional studies.

**Note:** An Explanation and Elaboration article discusses each checklist item and gives methodological background and published examples of transparent reporting. The STROBE checklist is best used in conjunction with this article (freely available on the Web sites of PLoS Medicine at <http://www.plosmedicine.org/>, Annals of Internal Medicine at <http://www.annals.org/>, and Epidemiology at <http://www.epidem.com/>). Information on the STROBE Initiative is available at [www.strobe-statement.org](http://www.strobe-statement.org).

# BMJ Open

## Self-Management and Blood Pressure Control in China: A Community Based Multicenter Cross-Sectional Study

|                                 |                                                                                                                                                                                                                                                                                                                                                                                                                                                                                                                                                                                                                                                                                 |
|---------------------------------|---------------------------------------------------------------------------------------------------------------------------------------------------------------------------------------------------------------------------------------------------------------------------------------------------------------------------------------------------------------------------------------------------------------------------------------------------------------------------------------------------------------------------------------------------------------------------------------------------------------------------------------------------------------------------------|
| Journal:                        | <i>BMJ Open</i>                                                                                                                                                                                                                                                                                                                                                                                                                                                                                                                                                                                                                                                                 |
| Manuscript ID                   | bmjopen-2018-025819.R1                                                                                                                                                                                                                                                                                                                                                                                                                                                                                                                                                                                                                                                          |
| Article Type:                   | Research                                                                                                                                                                                                                                                                                                                                                                                                                                                                                                                                                                                                                                                                        |
| Date Submitted by the Author:   | 06-Dec-2018                                                                                                                                                                                                                                                                                                                                                                                                                                                                                                                                                                                                                                                                     |
| Complete List of Authors:       | Qu, Zhan; Xi'an Jiaotong University, Health Science Center, School of Nursing<br>Parry, Monica; University of Toronto Lawrence S Bloomberg Faculty of Nursing,<br>Liu, Fang; Xi'an Jiaotong University, Health Science Center, School of Nursing<br>Wen, Xiuling; The First Affiliated Hospital of Xi'an Jiaotong University<br>Li, Jieqiong; The First Affiliated Hospital of Xi'an Jiaotong University<br>Zhang, Yanan; Xi'an Jiaotong University, Health Science Center, School of Public Health<br>Wang, Duolao; Liverpool School of Tropical Medicine, Department of Clinical Sciences<br>Li, Xiaomei; Xi'an Jiaotong University, Health Science Center, School of Nursing |
| <b>Primary Subject Heading</b>: | Nursing                                                                                                                                                                                                                                                                                                                                                                                                                                                                                                                                                                                                                                                                         |
| Secondary Subject Heading:      | Public health                                                                                                                                                                                                                                                                                                                                                                                                                                                                                                                                                                                                                                                                   |
| Keywords:                       | Hypertension < CARDIOLOGY, self-management, community care, sex, gender                                                                                                                                                                                                                                                                                                                                                                                                                                                                                                                                                                                                         |
|                                 |                                                                                                                                                                                                                                                                                                                                                                                                                                                                                                                                                                                                                                                                                 |

SCHOLARONE™  
Manuscripts

1  
2  
3  
4 **Full Title:** Self-Management and Blood Pressure Control in China: A Community  
5  
6 Based Multicenter Cross-Sectional Study  
7

8  
9 **Authors, Degrees and Affiliations:** Zhan Qu BA, MA, RN, PhD Candidate<sup>1</sup>, Monica  
10  
11 Parry NP-Adult PhD<sup>2</sup>, Fang Liu BSc, RN, MSc, PhD<sup>1</sup>, Xiuling Wen BSc, RN, MSc,  
12  
13 PhD<sup>3</sup>, Jieqiong Li BSc, RN, MSc, PhD<sup>3</sup>, Yanan Zhang BSc, RN, MSc<sup>4</sup>, Duolao Wang  
14  
15 PhD<sup>5</sup>, Xiaomei Li BN, MN, RN, PhD<sup>1\*</sup>  
16  
17

18  
19 **Author Details:**  
20

21  
22 <sup>1</sup>School of Nursing, Health Science Center, Xi'an Jiaotong University, Xi'an,  
23  
24 Shaanxi, P. R. China.  
25

26  
27 <sup>2</sup>Lawrence S. Bloomberg Faculty of Nursing, University of Toronto, Toronto, ON,  
28  
29 Canada.  
30

31  
32 <sup>3</sup>The First Affiliated Hospital of Xi'an Jiaotong University, Xi'an Shaanxi, P. R. China.  
33

34  
35 <sup>4</sup>Institute of Endemic Diseases, School of Public Health, Health Science Center, Xi'an  
36  
37 Jiaotong University, Xi'an, Shaanxi, P. R. China.  
38

39  
40 <sup>5</sup>Department of Clinical Sciences, Liverpool School of Tropical Medicine, Liverpool,  
41  
42 United Kingdom.  
43

44  
45 **Correspondence:** Xiaomei Li, <sup>1</sup>School of Nursing, Health Science Center, Xi'an  
46  
47 Jiaotong University, 76 Yanta West Road, Xi'an, 710061, Shaanxi, P. R. China,  
48  
49 roselee8825@163.com, (86) 29 8265-7017 (Office), (86) 29 8265-7015 (Fax).  
50

51  
52  
53 **Word Count:** 3526 words  
54

55  
56 **Keywords:** hypertension, self-management, community care, sex, gender  
57  
58  
59  
60

## ABSTRACT

**Objectives** This study explored the relationship between self-management and blood pressure control in China.

**Design** A cross-sectional study.

**Setting** Eight community health centers from four cities in the northeast (Shenyang), northwest (Xi'an), southwest (Chengdu), and south (Changsha) of China.

**Participants** A total of 873 adults with hypertension, including 360 men and 513 women. Hypertension was defined as systolic blood pressure (SBP)  $\geq$  140 mmHg and/ or diastolic blood pressure (DBP)  $\geq$  90 mmHg.

**Outcome measurements** Blood pressure control was the primary outcome variable categorized as good control if individuals with hypertension managed to reduce their blood pressure to  $<$  140/90 mmHg, otherwise it was categorized as poor control. Secondary outcomes included self-management defined as: 1) condition specific factors and physical/social environments (context), and 2) knowledge and beliefs, self-regulation skills and abilities, and social facilitation (process). Data were analyzed using logistic regression models using SPSSv20.

**Results** A total of 67% (n=586) of participants had poor blood pressure control. Limited outpatient care benefits in mainly rural residents (OR=2.26, 95% CI: 1.06-4.81) and longer disease duration (OR=1.03, 95% CI: 1.01-1.04) were associated with poor blood pressure control. Self-management practices reduced the odds of having poor BP control (OR=0.98, 95% CI: 0.97-0.99).

**Conclusions** The individual and family self-management theory can serve as an

1  
2  
3  
4 effective theory for understanding the key contexts, processes, and outcomes essential  
5  
6 for blood pressure control in China. Future research should evaluate the effect of a  
7  
8 self-management intervention (e.g., self-monitoring, medication adherence, regular  
9  
10 and routine doctor visits, and social supports) for blood pressure control in China  
11  
12 using a multisite cluster randomized controlled trial. Sex and gender difference, cost  
13  
14 and patient-reported outcomes should also be examined.  
15  
16  
17  
18  
19  
20  
21

### 22 **Strengths and Limitations of this study**

- 24 • A strength is the use of the individual and family self-management theory  
25 (IFSMT) to guide the study.  
26  
27
- 28 • A strength is incorporation of a sex-based analysis.  
29  
30
- 31 • A strength is an attempt to use a surrogate marker of gender in the interpretation  
32 of results (level of education, personal income and employment status).  
33  
34
- 35 • A limitation is the use of the Self-management Scale for Patients with  
36 Hypertension. It has not been widely used and need further psychometric testing.  
37  
38
- 39 • A limitation of the study is the use of self-reported outcomes and the potential for  
40 reporting bias.  
41  
42  
43  
44  
45  
46  
47  
48  
49  
50  
51  
52  
53  
54  
55  
56  
57  
58  
59  
60

## BACKGROUND

The prevalence of hypertension has increased worldwide.<sup>1</sup> It is the most significant risk factor of cardiovascular disease (CVD), accounting for nearly half of the cardiovascular morbidity and mortality in the world.<sup>2-5</sup> In China, hypertension is a serious public health problem; it has increased almost 400% from 1980 to 2015 (from estimated 59 million to 244.5 million),<sup>6-8</sup> and accounted for over 2 million deaths or 24.6% of all-cause mortality.<sup>9</sup> Hypertensive complications in China are similar to other countries, and include stroke, myocardial infarction, heart failure and chronic kidney disease.<sup>10</sup> Stroke is the leading cause of death and disability in China with an annual mortality of 1.6 million;<sup>11</sup> hypertension is the most important risk factor for stroke with the highest attributable risk at 34.6%.<sup>11</sup> Annual stroke healthcare expenditures are approximately ¥40 billion (US\$6.4 billion), causing a huge burden to the Chinese economy.<sup>11</sup> Domestic and international research studies have proved that adequate control of blood pressure reduces stroke,<sup>12</sup> CVD<sup>13</sup> and burden of disease,<sup>14 15</sup> and significantly improves health-related quality of life (HRQOL).<sup>16 17</sup>

The Chinese government launched the Chinese Basic Public Health Service Program in 2009, which provides a package of care that includes hypertension and diabetes screening and management in community health facilities. In 2013, the 17-country Prospective Urban Rural Epidemiology (PURE) study reported hypertension awareness of 46.5%, treatment of 87.5%, and control of 32.5%.<sup>2</sup> In 2017, the China Patient-Centered Evaluative Assessment of Cardiac Events (PEACE) study of 1.7 million individuals with hypertension suggested the prevalence of hypertension in

1  
2  
3  
4 China was 37.2%, with an awareness of 36%, treatment of 22.9%, and control of only  
5  
6 5.7%.<sup>8</sup> These results suggest current governmental packages of care are insufficient to  
7  
8 address the burden of hypertension in China.<sup>18</sup>  
9  
10

11  
12 Successful self-management strategies for individuals can result in effective  
13  
14 control of blood pressure.<sup>19 20</sup> Many studies of hypertension self-management have  
15  
16 improved blood pressure outcomes in the Western societies<sup>15 21 22</sup> however, the  
17  
18 evidence for hypertension self-management is absent in the Chinese population. A  
19  
20 recent systematic review identified only two quasi-experimental studies focusing on  
21  
22 hypertension self-management in the population of American Chinese<sup>23</sup> and much of  
23  
24 the evidence was derived from a single urban site, so is not representative of  
25  
26 individuals living in community settings.<sup>24 25</sup>  
27  
28  
29  
30  
31

32  
33 The individual and family self-management theory (IFSMT) suggests a dynamic  
34  
35 model of self-management consisting of: 1) condition specific factors and  
36  
37 physical/social environments (context), 2) knowledge and beliefs, self-regulation  
38  
39 skills and abilities, and social facilitation (process), and 3) cost, health status, and  
40  
41 HRQOL (outcomes).<sup>26</sup> Self-regulation includes the processes used to change  
42  
43 behavior, such as setting goals, self-monitoring, reflective thinking, planning/  
44  
45 participating in specific behaviors, management of responses, and self-evaluation.<sup>26</sup>  
46  
47  
48  
49 Approaches to managing hypertension using the IFSMT within the Chronic Care  
50  
51 Model<sup>27 28</sup> suggests individuals utilize self-regulation skills and abilities<sup>19 29 30</sup> and  
52  
53 work in partnership with healthcare providers to improve outcomes.<sup>31</sup>  
54  
55  
56  
57

58 Sex and gender difference have been gaining attention in the development and  
59  
60

1  
2  
3  
4 management of hypertension.<sup>32-34</sup> Women are twice as likely to have uncontrolled  
5  
6 blood pressure after menopause,<sup>32</sup> have a higher prevalence of obesity,<sup>35</sup> and are less  
7  
8 likely to engage in physical activities<sup>36</sup> compared to men. Although the treatment  
9  
10 benefit of antihypertensive agents may not differ between men and women,<sup>37</sup> women  
11  
12 with hypertension are less likely to achieve recommended blood pressure targets,<sup>38 39</sup>  
13  
14 even with significantly higher use of antihypertensive medications.<sup>39</sup> Sex and gender  
15  
16 are distinct concepts often used interchangeably in the literature, both are important to  
17  
18 hypertension prevalence, awareness and management.<sup>22 35 40</sup> Sex represents the  
19  
20 biological characteristics of being male or female and gender represents the social  
21  
22 norms and expectations ascribed to men and women.<sup>41 42</sup> Gender differences in  
23  
24 women's self-management practices are affected by broader social, environmental,  
25  
26 and community factors described as gender roles, gender identity, gender  
27  
28 relationships and institutionalized gender.<sup>43</sup>  
29  
30  
31  
32  
33  
34  
35  
36  
37

38 The aim of this study is to describe context and process variables within the  
39  
40 IFSMT that impact blood pressure control (outcomes) in men and women in China.  
41  
42 This includes exploring both sex and gender aspects to self-management and blood  
43  
44 pressure control in Chinese adults living in the community.  
45  
46  
47  
48  
49

## 50 51 **METHODS**

52  
53 **Study design and settings.** Using a cross-sectional study design, individuals  
54  
55 with hypertension were recruited from eight community health care centers in the  
56  
57 northeast (Shenyang City), northwest (Xi'an City), southwest (Chengdu City), and  
58  
59  
60



1  
2  
3  
4 south (Changsha City) of China from April 2015 to January 2016. Four geographic  
5  
6 areas were chosen in an attempt to recruit a representative sample of individuals with  
7  
8 hypertension in China.  
9

10  
11 **Participants.** Recruitment was conducted in four steps. First, forty national  
12  
13 model community health centers accredited between 2011 and 2013 were purposely  
14  
15 selected from the four cities in China.<sup>44-46</sup> These centers provide national standardized  
16  
17 medical care to more than 100,000 individuals within a district in each of the four  
18  
19 cities. Second, two community health care centers were randomly selected in each  
20  
21 city from the forty national model community centers using a random number table  
22  
23 for study participation. Third, 1048 individuals (131 from each community health  
24  
25 center) who had been screened and diagnosed with hypertension within the past six  
26  
27 months were randomly recruited from electronic health care information systems.  
28  
29 Fourth, individuals were contacted to determine their interest in participating in a  
30  
31 telephone interview to learn more about the study.  
32  
33  
34  
35  
36  
37  
38  
39

40 Individuals who met the following inclusion criteria were recruited to participate:  
41  
42 age  $\geq$  18 years, SBP  $\geq$  140 mmHg and/or DBP  $\geq$  90 mmHg or prescribed  
43  
44 antihypertensive medication for at least six months and able to identify their  
45  
46 hypertensive medications within their medication schedule, able to read and write the  
47  
48 Chinese language, and able to provide written informed consent to participate in the  
49  
50 study. Individuals were excluded if they were pregnant, had cancer, or were  
51  
52 cognitively impaired (defined as difficulty processing thoughts, concentrating to  
53  
54 answer questions, or difficulty remembering the names of people and/or places they  
55  
56  
57  
58  
59  
60

1  
2  
3  
4 met and/or visited recently).

5  
6 The study was approved by the Ethics Committee of Xi'an Jiaotong University  
7  
8 Health Science Center. Trained research assistants who followed standard operating  
9  
10 procedures explained the purpose and confidentiality of the study to participants and  
11  
12 informed consent was obtained prior to survey completion.  
13  
14

15  
16  
17 **Patient and public involvement.** Patients and the public were not involved in  
18  
19 the design of this study.  
20

21  
22 **Measurement.** The IFSMT guided data collection and measurement.<sup>26</sup>  
23

24  
25 **Context.** Demographic (age, sex, marital status, education, personal income, and  
26  
27 health insurance) data were collected by interview using investigator-developed  
28  
29 questionnaires. Marital status was divided into two categories: married or  
30  
31 single/divorced/widowed. Education was represented as: primary school or no formal  
32  
33 education (< 6 years of schooling), high school (6-12 years of schooling), or college  
34  
35 or higher (> 12 years of schooling). Personal income was divided into two categories:  
36  
37  $\leq$  ¥ 1500 (US\$225) or  $>$  ¥ 1500 (US\$225) based on the Chinese individual income  
38  
39 tax rate.<sup>47</sup> Health insurance was divided into four categories: Urban Employees'  
40  
41 Medical Insurance (UEMI), Urban Residents' Medical Insurance (URMI), New Rural  
42  
43 Cooperative Medical Scheme (NCMS), or uninsured.  
44  
45  
46  
47  
48  
49

50  
51 Risk behaviors included smoking (smoker [current smokers who smoked more  
52  
53 than one cigarette daily]) or non-smoker [smoked fewer than 6 months and who never  
54  
55 smoke before]) and alcohol consumption (consumer or non-consumer [consumed less  
56  
57 than 1 glass per month and those who never drank before]). Family history of  
58  
59  
60

1  
2  
3  
4 hypertension was defined as a blood relative such as mother, father, sister, or brother  
5  
6 with diagnosed hypertension ( $SBP \geq 140$  or  $DBP \geq 90$ ). Anthropometric  
7  
8 measures included weight and height (body mass index [BMI]) and waist  
9  
10 circumference [WC]). Body mass index was calculated as weight in kilograms  
11  
12 divided by height in meters squared and classified into four levels according to the  
13  
14 guidelines for prevention and control of overweight and obesity in Chinese adults:  
15  
16 underweight ( $< 18.5 \text{ kg/m}^2$ ), normal ( $18.5\text{-}23.9 \text{ kg/m}^2$ ), overweight ( $24.0\text{-}27.9 \text{ kg/m}^2$ ),  
17  
18 and obese: ( $\geq 28 \text{ kg/m}^2$ ).<sup>48-50</sup> Waist circumference (WC) was divided into two  
19  
20 categories: obese (men  $\geq 90\text{cm}$ , women  $\geq 80$ ) and normal (men  $< 90\text{cm}$ , women  
21  
22  $< 80\text{cm}$ ) according to the International Diabetes Federation<sup>51</sup> and National Institute  
23  
24 for Health and Care Excellence.<sup>52</sup> Comorbidities were self-reported and based on a  
25  
26 physician's diagnosis.  
27  
28  
29  
30  
31  
32  
33

34  
35 **Process.** The self-management scale for individuals with hypertension<sup>53</sup> used in  
36  
37 this study was developed by the China Medical Foundation (CMB) community  
38  
39 chronic disease management research group. Split-half reliability of the scale was  
40  
41 0.976 and Cronbach's alpha ranged from 0.853 to 0.868 on each of the 5 sub-scales.  
42  
43 The five subscales contained 21 Likert scale items addressing: treatment management,  
44  
45 diet management, physical exercise management, lifestyle management, and risk  
46  
47 factor management. Subscale scores ranged from 1 to 5 and total scores ranged from  
48  
49 21 to 105, with higher scores indicating higher self-management behaviors  
50  
51 (Supplementary File). In this this study, we converted the original subscale scores into  
52  
53 standard scores for comparisons.  
54  
55  
56  
57  
58  
59  
60

1  
2  
3  
4 **Outcomes. Blood Pressure.** Blood pressure control was defined as a good if  
5  
6 individuals had a SBP < 140 mmHg and DBP < 90 mmHg. Blood pressures were  
7  
8 taken by trained nurses using a mercury sphygmomanometer according to the  
9  
10 criterion formulated by the Chinese Hypertension League/National Center for  
11  
12 Cardiovascular Disease (CHL/NCCD).<sup>54</sup> Two BP readings for each participant were  
13  
14 obtained at 2-minute intervals in a sitting position and then averaged for analysis.  
15  
16  
17  
18

19 **Bias.** This study is cross-sectional and results may be subject to a non-response  
20  
21 bias.<sup>55</sup> However, recruiting a large number of individuals with hypertension across  
22  
23 four areas of China attempted to minimize this bias. As this is an observational study,  
24  
25 results are limited by self-reported survey questions. Additionally, there could be  
26  
27 other unobserved confounding factors we have neither considered nor controlled.  
28  
29  
30  
31

32 **Sample size.** The sample size was based on 15 to 30 subjects per predictor in the  
33  
34 logistic regression model.<sup>56</sup> Given there were 22 predictors, the final sample size was  
35  
36 estimated at 660. The final sample size was increased to a total of 792 participants to  
37  
38 account for a 20% attrition (n=106 participants from each community health care  
39  
40 center).  
41  
42  
43  
44

45 **Data analysis.** All data were analyzed using SPSSv20. Univariate statistics  
46  
47 (frequencies, percentages, and means) were used to describe the contextual factors of  
48  
49 the sample. Bivariate associations between context and process variables were  
50  
51 assessed using  $X^2$  and t-tests, or Mann-Whitney U tests for non-normally distributed  
52  
53 outcome variables.  
54  
55  
56  
57

58 Based on the IFSMT theory, a multivariable logistic regression model was used  
59  
60

1  
2  
3  
4 to examine the association between context (individual/family, condition specific),  
5  
6 process (blood pressure self-regulation skills & abilities [treatment management, diet  
7  
8 management, physical exercise management, lifestyle management, risk factor  
9  
10 management], community health centers (CHC) visits, hospitals visits and outcomes  
11  
12 (blood pressure control). Preliminary steps included assessing for multicollinearity  
13  
14 using the variance inflation factor (VIF). A hierarchical approach was used to build  
15  
16 our final model,<sup>56</sup> starting with Model 1 , then cumulatively adding clusters (Models 2  
17  
18 and 3) of variables.  
19  
20  
21  
22  
23  
24

25 In model 1, the non-modifiable context variables related to the individual /family  
26  
27 (age, sex, marital status, education, employment, personal incomes, and health  
28  
29 insurance) were explored. In model 2, modifiable variables that were condition  
30  
31 specific (BMI, WC, disease duration, comorbidities, family history, smoking and  
32  
33 drinking status) were added to Model 1. In model 3, processes variables related to  
34  
35 self-regulation skills and abilities (treatment management, diet management, physical  
36  
37 exercise management, lifestyle management, risk factors management, CHC visits,  
38  
39 and hospitals visits) were added to Model 2. Nested models were compared using the  
40  
41 likelihood ratio test (LRT). Clusters were kept in the model if they significantly  
42  
43 contributed to model fit based on the LRT. A two-sided p-value of  $p < 0.05$  was used  
44  
45 to establish statistical significance.  
46  
47  
48  
49  
50  
51  
52  
53  
54  
55

## 56 RESULTS

57  
58 Twenty-nine individuals refused to participate in the interview. Of those who  
59  
60

1  
2  
3  
4 participated, 114 individuals were excluded due to cognitive impairment (n= 90),  
5  
6 pregnancy (n=11), and cancer (n=13). Of 905 eligible participants, 32 were excluded  
7  
8 because of missing or implausible (more than 50% of the responses) data (Figure 1).  
9  
10 A total final sample of 873 individuals with hypertension (360 males, 513 females)  
11  
12 consented to participate in the study.  
13  
14

15  
16  
17 - Insert Figure 1 -  
18

19 **Context.** Demographic characteristics of participants are presented in Table 1.

20  
21 The mean age of participants was 65 years. Most of the sample were female (n=513,  
22  
23 58.8%), married (n=757, 86.7%) and retired (n=596, 68.3%). The majority of  
24  
25 participants had health insurance (n=839, 96.1%), 10 years disease duration and poor  
26  
27 blood pressure control (n= 586, 67.1%). Most had an abnormal BMI (underweight,  
28  
29 overweight and obese) (n=569, 65.1%) and WC (n= 644, 73.8%). Compared to men,  
30  
31 more women were single/divorced/widowed, less likely to have graduated from  
32  
33 college, were unemployed, and had a lower personal income. Women were also more  
34  
35 likely to be non-smokers and non-drinkers but had more co-morbidities compared to  
36  
37 men.  
38  
39  
40  
41  
42  
43  
44

45 - Insert Table 1 -  
46  
47

48 **Process.** Self-management process variables are reported in Table 2. The lowest  
49  
50 scores in self-management skills and abilities were in treatment management (e.g.,  
51  
52 medication adherence, routine and regular doctors' visits, self-monitoring blood  
53  
54 pressure), physical exercise management, lifestyle management, and diet  
55  
56 management. Scores of risk factor management were highest. Compared to men,  
57  
58  
59  
60

1  
2  
3  
4 women were more likely to have higher total scores for self-management  
5  
6 skills/abilities, diet management and risk factor management. Women also had more  
7  
8 hospital visits compared to men.  
9

10  
11 - Insert Table 2 -  
12  
13

14 **Outcomes.** Results of the logistic regressions analyses are depicted in Table 3.  
15  
16 All models had good fit based on the Hosmer-Lemeshow test. In Model 1, personal  
17 income, and health insurance were significant for BP control. Participants with NCMS  
18 (medical scheme mainly for rural residents) compared to UEMI (medical insurance  
19 mainly for urban employees) increased the odds of poor blood pressure (OR= 2.70,  
20 95% CI: 1.28-5.67). When BMI, WC, smoking, drinking, family history, disease  
21 duration and comorbidities were added into Model 2, there was a slightly lower odds  
22 of NCMS compared with UEMI affecting poor BP control (OR= 2.69, 95% CI: 1.27-  
23 5.69). A higher odds of having poor BP control was also observed with a longer  
24 duration of disease (OR=1.03, 95% CI: 1.01-1.04). A similar pattern was observed  
25 when treatment management, diet management, physical exercise management,  
26 lifestyle management, risk factor management, CHC visits, and hospital visits were  
27 added to Model 3. Self-management treatments reduced the odds of poor BP control  
28 in the final model (OR= 0.98, 95% CI: 0.97-0.99).  
29  
30  
31  
32  
33  
34  
35  
36  
37  
38  
39  
40  
41  
42  
43  
44  
45  
46  
47  
48  
49

50 - Insert Table 3 -  
51  
52  
53  
54

## 55 **DISCUSSION**

56  
57  
58 **Context of self-management and blood pressure control.** The results of this  
59  
60

1  
2  
3  
4 study provide insights into the contextual self-management factors that impact blood  
5  
6 pressure control in China. A total of 67% of individuals with hypertension living in  
7  
8 the community did not achieve recommended blood pressure targets. Our results are  
9  
10 consistent with previous studies that suggest poor blood pressure control is linked to a  
11  
12 lower socioeconomic status.<sup>57 58-60</sup> Individuals with UEMI health insurance and  
13  
14 benefit packages that covered outpatient services had better blood pressure control  
15  
16 than those individuals enrolled with NCMS (extremely limited outpatient care  
17  
18 benefits for rural residents).<sup>61-63</sup> Inadequate insurance and poor blood pressure control  
19  
20 is also supported by a US national Health and Nutrition Examination Survey  
21  
22 (NHANES).<sup>64</sup>

23  
24  
25  
26  
27  
28  
29  
30 Results from this study also suggests longer disease duration increases the odds  
31  
32 of having poor blood pressure control. This is consistent with a cross-sectional study  
33  
34 in Hong Kong that advanced age and longer duration of antihypertensive medication  
35  
36 use was independently associated with poor blood pressure control.<sup>65</sup> The longer  
37  
38 duration of hypertension may indicate poor adherence to self-management practices.  
39  
40 However, in other studies elderly patients (age  $\geq 65$  years) with hypertension and a  
41  
42 longer duration of antihypertensive medicine use exhibited good adherence and better  
43  
44 blood pressure control.<sup>66 67</sup> In general, blood pressure is more difficult to control with  
45  
46 increasing age. A cross-sectional study of outpatients in the United States showed that  
47  
48 concomitant use of more than one antihypertensive medication increases with patient  
49  
50 age (up to age 80 years, after which it then decreases); this may have an impact on the  
51  
52 patient's willingness or ability to comply with the overall treatment regimes.<sup>68</sup> More  
53  
54  
55  
56  
57  
58  
59  
60



1  
2  
3  
4 than half of the participants in this study had more than one comorbidity, which may  
5  
6 influence participants' medication adherence.  
7  
8

9  
10 Women in this study were significantly older and more likely to have more than  
11 one comorbidity (arthritis and back and neck problems) compared to men. In addition  
12 to age, biological sex influences the development of comorbidities,<sup>69 70</sup> such as  
13 hypertension after menopause.<sup>35</sup> Comorbidities among women aged 60 to 79 years  
14 with hypertension have been previously reported;<sup>69 70</sup> they increase the complexities  
15 of care for women,<sup>71</sup> and have been associated with poor self-care ability.<sup>71</sup> Low  
16 income has not only been a predictor resulting in low adherence to medication  
17 regimes,<sup>72</sup> it has also been a factor associated with the development of comorbid  
18 disease.<sup>73</sup> More women in this study also lived alone with fewer supports compared to  
19 men. These findings may explain the more frequent unscheduled physician and CHC  
20 visits in women and provide important information for developing effective self-  
21 management interventions to improve blood pressure control in China.  
22  
23  
24  
25  
26  
27  
28  
29  
30  
31  
32  
33  
34  
35  
36  
37  
38  
39

40 Individuals in this study with lower personal incomes were women; women who  
41 were older, lived alone, had lower education, and were more likely to be unemployed.  
42 Level of education, hours of work, occupation and responsibility in caring for children  
43 has been conceptualized by others as gender-related.<sup>74</sup> Lower educated women  
44 compared with higher educated women and non-working women compared non-  
45 working men have been associated with poor blood pressure control;<sup>75 76</sup> others report  
46 traditional sex differences in cardiovascular disease risk factors are explained by  
47 feminine personality traits. (i.e., gender).<sup>41</sup> Neither sex nor gender affected blood  
48  
49  
50  
51  
52  
53  
54  
55  
56  
57  
58  
59  
60

1  
2  
3  
4 pressure control in this study, but it may be because we did not have a robust measure  
5  
6 of gender. Gender has generally been defined across four dimensions including  
7  
8 gender roles, gender identity, gender relationships and institutionalized gender.<sup>43</sup> The  
9  
10 important role gender may play in blood pressure control requires further  
11  
12 investigation, especially in a culture where boys are encouraged to pursue higher  
13  
14 education and girls encouraged to work in the family home.  
15  
16  
17

18  
19 **Process of self-management and blood pressure control.** This study is one of  
20  
21 few to compare hypertensive self-management skills in treatment, diet, physical  
22  
23 exercise, lifestyle, and risk factors in China. Poor blood pressure control was  
24  
25 significantly associated with low self-management skills, especially in treatment  
26  
27 management (e.g., medication adherence, regularly scheduled doctors' visits, and self-  
28  
29 monitoring of blood pressure). This is supported by the IFSMT theory, which purports  
30  
31 successful blood pressure control at the individual level is related to an individual's  
32  
33 self-management skills and their involvement in the treatment and control of their  
34  
35 condition.<sup>77</sup> A lifelong adherence to prescribed anti-hypertensive medications, regular  
36  
37 clinic visits, and self-monitoring skills have assisted other individuals to control their  
38  
39 blood pressure.<sup>78 79</sup> Non-adherence to treatment management is related to a higher risk  
40  
41 of cardiovascular morbidity and mortality.<sup>80 81</sup> Hypertension is an asymptomatic  
42  
43 disease, most individuals with hypertension do not experience symptoms and may not  
44  
45 feel it necessary to adhere to prescribed or suggested treatment regimes.<sup>82</sup> Moreover,  
46  
47 medication side effects may also deter individuals from adhering to prescribed or  
48  
49 suggested treatment regimes, especially in the elderly Chinese.<sup>83</sup> The perceived  
50  
51  
52  
53  
54  
55  
56  
57  
58  
59  
60

1  
2  
3  
4 benefits of Chinese herbs may be more important than western antihypertensive  
5  
6 medications for elderly Chinese who tend to be less adherent with western  
7  
8 antihypertensive medications and believe Chinese herbs have fewer side effects.<sup>84</sup>  
9  
10 Integrating traditional practices into hypertension management regimes with frequent  
11  
12 and careful monitoring of side effects of and adjustment of medications may be  
13  
14 warranted. Effectiveness and adherence to antihypertensive medication regimes  
15  
16 depends on regularly scheduled visits to community health centers.<sup>25</sup> Regular blood  
17  
18 pressure monitoring also reduces hypertension,<sup>85 86</sup> suggesting home blood pressure  
19  
20 monitoring should have a primary role in long-term blood pressure control in China.  
21  
22 The results of this study also show that women are more likely to have better skills in  
23  
24 diet and risk factor management. The findings are consistent with those of Choi<sup>87</sup> and  
25  
26 Zhou<sup>88</sup> who report that women with hypertension have higher diet management skills,  
27  
28 especially related to the daily consumption of fresh vegetables and fruits, which are  
29  
30 thought to be protective factors associated with better blood pressure control.<sup>88</sup>  
31  
32 Diet and risk factor management were not significantly associated with blood pressure  
33  
34 control in this study and this maybe because diet management (e.g., balanced diet and  
35  
36 salt/sodium control) is difficult for participants to conceptualize. This requires futher  
37  
38 exploration in future study.  
39  
40  
41  
42  
43  
44  
45  
46  
47  
48  
49

50  
51 Limitations. There are several limitations to the study. First, this study is cross-  
52  
53 sectional and results may be subject to a non-response bias.<sup>55</sup> However, recruiting a  
54  
55 large number of individuals with hypertension across four areas of China attempted to  
56  
57 minimize this bias. Second, many of the context and process variables were self-  
58  
59  
60

1  
2  
3  
4 reported, increasing the potential for a response bias. Third, the scale of self-  
5  
6 management for patients with hypertension scale has not been widely used and need  
7  
8 further psychometric testing. Lastly, a more robust measure of gender needs to be  
9  
10 incorporated into future research. The strengths of the study include use of the  
11  
12 individual and family self-management theory and the incorporation of sex and  
13  
14 gender-based lens to guide the data analyses and interpretation.  
15  
16  
17  
18  
19  
20  
21

## 22 **CONCLUSION**

23  
24 This is one of few studies using IFSMT theory to assess how context and process  
25  
26 variables influence self-management and blood pressure in individuals with  
27  
28 hypertension. Context variables related to longer disease duration, lower income, and  
29  
30 NCMS health insurance (inadequate outpatient care benefits for rural residents) were  
31  
32 associated with poor control of hypertension in China. Lower cost sharing of  
33  
34 outpatient care, increasing access to preventive care, and improving accessibility to  
35  
36 medications and self-management strategies for NCMS enrollees should be  
37  
38 considered by Chinese health care policy makers. Moreover, sex and gender-related  
39  
40 factors, including strategies to improve self-management skills and provide social  
41  
42 supports need to be investigated in future randomized controlled trials.  
43  
44  
45  
46  
47  
48  
49  
50  
51  
52

53 **Acknowledgements** We thank all participants involved in the research. We are  
54  
55 grateful to the nurses, doctors and health care providers in the community health  
56  
57  
58  
59  
60

1  
2  
3  
4 centers for their efforts in coordination of the fieldwork. We thank Ying Zhang, RN,  
5  
6 Yue Ma, RN and Yiping Nan, RN for their assistance with data collection.  
7  
8

9 **Contributors** XML was a major contributor in project administration, research  
10  
11 design, organizing the fieldwork, giving advice on the manuscript writing, and  
12  
13 supervision. ZQ and MP were major contributors in data analysis, manuscript writing  
14  
15 and revision. ZQ, FL, XLW and JQL were involved in community nursing training in  
16  
17 blood pressure measurement, providing patient-centered questionnaire instructions,  
18  
19 collecting data, and inputting results into the database. ZQ, MP, YNZ and DLW  
20  
21 analyzed and interpreted all patient data. All authors have read and approved the final  
22  
23 manuscript.  
24  
25  
26  
27  
28

29  
30 **Funding** This work was supported by China Medical Board, Grant Number (11-085).  
31

32 **Competing interests** None declared.  
33  
34

35 **Patient consent** Obtained.  
36  
37

38 **Ethics approval** This study was approved by the ethics review committee of Xi'an  
39  
40 Jiaotong University.  
41  
42

43 **Provenance and peer review** Not commissioned; externally peer reviewed.  
44  
45

46 **Data sharing statement** No additional data are available.  
47  
48  
49

## 50 REFERENCES

51  
52 1. NCD Risk Factor Collaboration (NCD-RisC). Worldwide trends in blood pressure  
53  
54 from 1975 to 2015: a pooled analysis of 1479 population-based measurement studies  
55  
56 with 19·1 million participants. *The Lancet* 2017;389(10064):37-55. doi:  
57  
58 [https://doi.org/10.1016/S0140-6736\(16\)31919-5](https://doi.org/10.1016/S0140-6736(16)31919-5)  
59  
60

- 1  
2  
3  
4 2. Chow CK, Teo KK, Rangarajan S, et al. Prevalence, awareness, treatment, and  
5  
6 control of hypertension in rural and urban communities in high-, middle-, and low-  
7  
8 income countries. *Jama* 2013;310(9):959-68. doi: 10.1001/jama.2013.184182  
9  
10
- 11 3. Roger VL, Go AS, Lloyd-Jones DM, et al. Executive summary: heart disease and  
12  
13 stroke statistics--2012 update: a report from the American Heart Association.  
14  
15  
16  
17 *Circulation* 2012;125(1):188-97. doi: 10.1161/CIR.0b013e3182456d46  
18
- 19 4. Liu L. Cardiovascular diseases in China. *Biochemistry and cell biology* =  
20  
21 *Biochimie et biologie cellulaire* 2007;85(2):157-63. doi: 10.1139/o07-004 [published  
22  
23 Online First: 2007/05/31]  
24  
25
- 26 5. He J, Gu D, Wu X, et al. Major causes of death among men and women in China.  
27  
28  
29  
30 *The New England journal of medicine* 2005;353(11):1124-34. doi:  
31  
32 10.1056/NEJMsa050467 [published Online First: 2005/09/16]  
33  
34
- 35 6. Reynolds K, Gu D, Muntner P, et al. Geographic variations in the prevalence,  
36  
37 awareness, treatment and control of hypertension in China. *Journal of hypertension*  
38  
39 2003;21(7):1273-81. doi: 10.1097/01.hjh.0000059043.65882.15  
40  
41  
42
- 43 7. Wang Z, Chen Z, Zhang L, et al. Status of Hypertension in China: Results from the  
44  
45 China Hypertension Survey, 2012-2015. *Circulation* 2018 doi:  
46  
47 10.1161/circulationaha.117.032380  
48  
49
- 50 8. Lu J, Lu Y, Wang X, et al. Prevalence, awareness, treatment, and control of  
51  
52 hypertension in China: data from 1.7 million adults in a population-based screening  
53  
54 study (China PEACE Million Persons Project). *Lancet (London, England)*  
55  
56 2017;390(10112):2549-58. doi: 10.1016/s0140-6736(17)32478-9 [published Online  
57  
58  
59  
60

1  
2  
3  
4 First: 2017/11/06]  
5

6 9. Yang G, Wang Y, Zeng Y, et al. Rapid health transition in China, 1990–2010:  
7

8 findings from the Global Burden of Disease Study 2010. *The Lancet*  
9

10 2013;381(9882):1987-2015. doi: 10.1016/s0140-6736(13)61097-1  
11

12  
13  
14 10. Liu LS, & Writing Group of 2010 Chinese Guidelines for the Management of  
15

16 Hypertension. 2010 Chinese guidelines for the management of hypertension.  
17

18  
19 *American journal of hypertension* 2012;25(2):271-71. doi: 10.1038/ajh.2011.248  
20

21  
22 11. Liu L, Wang D, Wong KS, et al. Stroke and stroke care in China: huge burden,  
23

24 significant workload, and a national priority. *Stroke* 2011;42(12):3651-4. doi:  
25

26  
27 10.1161/strokeaha.111.635755 [published Online First: 2011/11/05]  
28

29  
30 12. Blood pressure, cholesterol, and stroke in eastern Asia. Eastern Stroke and  
31

32 Coronary Heart Disease Collaborative Research Group. *Lancet (London, England)*  
33

34 1998;352(9143):1801-7. [published Online First: 1998/12/16]  
35

36  
37 13. Collins R, Peto R, MacMahon S, et al. Blood pressure, stroke, and coronary heart  
38

39 disease. Part 2, Short-term reductions in blood pressure: overview of randomised drug  
40

41 trials in their epidemiological context. *Lancet (London, England)*  
42

43 1990;335(8693):827-38. [published Online First: 1990/04/07]  
44

45  
46  
47 14. Moran AE, Odden MC, Thanataveerat A, et al. Cost-effectiveness of hypertension  
48

49 therapy according to 2014 guidelines. *The New England journal of medicine*  
50

51 2015;372(5):447-55. doi: 10.1056/NEJMsa1406751  
52

53  
54  
55 15. Penaloza-Ramos MC, Jowett S, Mant J, et al. Cost-effectiveness of self-  
56

57 management of blood pressure in hypertensive patients over 70 years with suboptimal  
58

- control and established cardiovascular disease or additional cardiovascular risk diseases (TASMIN-SR). *European journal of preventive cardiology* 2016;23(9):902-908. doi: 10.1177/2047487315618784 [published Online First: 2015/11/26]
12. doi: 10.1177/2047487315618784 [published Online First: 2015/11/26]
16. Tsai JC, Yang HY, Wang WH, et al. The Beneficial Effect of Regular Endurance Exercise Training on Blood Pressure and Quality of Life in Patients with Hypertension. *Clinical and Experimental Hypertension* 2004;26(3):255-65. doi: 10.1081/ceh-120030234
17. Wolff M, Sundquist K, Larsson Lonn S, et al. Impact of yoga on blood pressure and quality of life in patients with hypertension - a controlled trial in primary care, matched for systolic blood pressure. *BMC cardiovascular disorders* 2013;13:111. doi: 10.1186/1471-2261-13-111 [published Online First: 2013/12/10]
18. Hesketh T, Zhou X. Hypertension in China: the gap between policy and practice. *The Lancet* 2017;390(10112):2529-30. doi: 10.1016/s0140-6736(17)32743-5
19. McManus RJ, Mant J, Haque MS, et al. Effect of self-monitoring and medication self-titration on systolic blood pressure in hypertensive patients at high risk of cardiovascular disease: the TASMIN-SR randomized clinical trial. *Jama* 2014;312(8):799-808. doi: 10.1001/jama.2014.10057
20. Tucker KL, Sheppard JP, Stevens R, et al. Self-monitoring of blood pressure in hypertension: A systematic review and individual patient data meta-analysis. *PLoS medicine* 2017;14(9):e1002389. doi: 10.1371/journal.pmed.1002389
21. Bosworth HB, Olsen MK, Grubber JM, et al. Two self-management interventions to improve hypertension control: a randomized trial. *Ann Intern Med*



2009;151(10):687-95. doi: 10.7326/0003-4819-151-10-200911170-00148 [published

Online First: 2009/11/19]

22. Magid DJ, Farmer SA. Hypertension Self-Management. *Circulation:*

*Cardiovascular Quality and Outcomes* 2014;7(2):205-06. doi:

doi:10.1161/CIRCOUTCOMES.114.000885

23. Huang Y-C, Garcia AA. Culturally-tailored interventions for chronic disease self-management among Chinese Americans: a systematic review. *Ethnicity & health*

2018:1-20. doi: 10.1080/13557858.2018.1432752

24. Fu D, Fu H, McGowan P, et al. Implementation and quantitative evaluation of chronic disease self-management programme in Shanghai, China: randomized controlled trial. *Bulletin of the World Health Organization* 2003;81(3):174-82.

[published Online First: 2003/05/24]

25. Gu J, Zhang X-J, Wang T-H, et al. Hypertension knowledge, awareness, and self-management behaviors affect hypertension control: a community-based study in Xuhui District, Shanghai, China. *Cardiology* 2014;127(2):96-104.

26. Ryan P, Sawin KJ. The Individual and Family Self-Management Theory:

background and perspectives on context, process, and outcomes. *Nurs Outlook*

2009;57(4):217-25 e6. doi: 10.1016/j.outlook.2008.10.004

27. Bodenheimer T, Lorig K, Holman H, et al. Patient self-management of chronic

disease in primary care. *Jama* 2002;288(19):2469-75. doi: 10.1001/jama.288.19.2469

28. Bodenheimer T, Wagner EH, Grumbach K. Improving primary care for patients

with chronic illness. *Jama* 2002;288(14):1775-9. [published Online First: 2002/10/09]

- 1  
2  
3  
4 29. Halme L, Vesalainen R, Kaaja M, et al. Self-monitoring of blood pressure  
5  
6 promotes achievement of blood pressure target in primary health care. *American*  
7  
8 *journal of hypertension* 2005;18(11):1415-20. doi: 10.1016/j.amjhyper.2005.05.017  
9  
10  
11 30. McManus RJ, Mant J, Roalfe A, et al. Targets and self monitoring in  
12  
13 hypertension: randomised controlled trial and cost effectiveness analysis. *Bmj*  
14  
15 2005;331(7515):493. doi: 10.1136/bmj.38558.393669.E0  
16  
17  
18 31. Grady PA, Gough LL. Self-management: a comprehensive approach to  
19  
20 management of chronic conditions. *American journal of public health*  
21  
22 2014;104(8):e25-31. doi: 10.2105/ajph.2014.302041 [published Online First:  
23  
24 2014/06/13]  
25  
26  
27  
28  
29 32. Abramson BL, Melvin RG. Cardiovascular risk in women: focus on hypertension.  
30  
31 *The Canadian journal of cardiology* 2014;30(5):553-9. doi:  
32  
33 10.1016/j.cjca.2014.02.014 [published Online First: 2014/05/03]  
34  
35  
36 33. Ong KL, Tso AW, Lam KS, et al. Gender difference in blood pressure control and  
37  
38 cardiovascular risk factors in Americans with diagnosed hypertension. *Hypertension*  
39  
40 2008;51(4):1142-8. doi: 10.1161/hypertensionaha.107.105205 [published Online  
41  
42 First: 2008/02/09]  
43  
44  
45  
46 34. Gu Q, Burt VL, Paulose-Ram R, et al. Gender differences in hypertension  
47  
48 treatment, drug utilization patterns, and blood pressure control among US adults with  
49  
50 hypertension: data from the National Health and Nutrition Examination Survey 1999-  
51  
52 2004. *American journal of hypertension* 2008;21(7):789-98. doi:  
53  
54 10.1038/ajh.2008.185 [published Online First: 2008/05/03]  
55  
56  
57  
58  
59  
60

- 1  
2  
3  
4 35. Everett B, Zajacova A. Gender differences in hypertension and hypertension  
5 awareness among young adults. *Biodemography and social biology* 2015;61(1):1-17.  
6  
7  
8  
9 36. Haskell WL, Lee I-M, Pate RR, et al. Physical activity and public health: updated  
10 recommendation for adults from the American College of Sports Medicine and the  
11 American Heart Association. *Circulation* 2007;116(9):1081.  
12  
13  
14  
15  
16 37. Gueyffier F, Boutitie F, Boissel J-P, et al. Effect of antihypertensive drug  
17 treatment on cardiovascular outcomes in women and men: a meta-analysis of  
18 individual patient data from randomized, controlled trials. *Annals of Internal*  
19 *Medicine* 1997;126(10):761-67.  
20  
21  
22  
23  
24  
25  
26 38. Gahagan J, Gray K, Whynacht A. Sex and gender matter in health research:  
27 addressing health inequities in health research reporting. *International journal for*  
28 *equity in health* 2015;14 doi: 10.1186/s12939-015-0144-4  
29  
30  
31  
32  
33  
34 39. Gu Q, Burt VL, Paulose-Ram R, et al. Gender differences in hypertension  
35 treatment, drug utilization patterns, and blood pressure control among US adults with  
36 hypertension: data from the National Health and Nutrition Examination Survey 1999–  
37 2004. *American journal of hypertension* 2008;21(7):789-98.  
38  
39  
40  
41  
42  
43  
44 40. Daugherty SL, Masoudi FA, Ellis JL, et al. Age-dependent gender differences in  
45 hypertension management. *Journal of hypertension* 2011;29(5):1005-11. doi:  
46 10.1097/HJH.0b013e3283449512 [published Online First: 2011/02/19]  
47  
48  
49  
50  
51  
52  
53 41. Pelletier R, Ditto B, Pilote L. A composite measure of gender and its association  
54 with risk factors in patients with premature acute coronary syndrome. *Psychosomatic*  
55 *medicine* 2015;77(5):517-26. doi: 10.1097/psy.000000000000186 [published Online  
56  
57  
58  
59  
60

1  
2  
3  
4 First: 2015/05/20]  
5

6 42. Johnson JL, Greaves L, Repta R. Better science with sex and gender: Facilitating  
7 the use of a sex and gender-based analysis in health research. *International journal for*  
8  
9  
10  
11  
12 *equity in health* 2009;8:14. doi: 10.1186/1475-9276-8-14  
13

14 43. How to integrate sex and gender into research. [Available from: [http://www.cihr-](http://www.cihr-irsc.gc.ca/e/50836.html)  
15  
16  
17 [irsc.gc.ca/e/50836.html](http://www.cihr-irsc.gc.ca/e/50836.html) accessed 23 July 2018.  
18

19 44. National Health and Family Planning Commission of the People's Republic of  
20  
21  
22  
23  
24  
25  
26  
27  
28  
29  
30  
31  
32  
33  
34  
35  
36  
37  
38  
39  
40  
41  
42  
43  
44  
45  
46  
47  
48  
49  
50  
51  
52  
53  
54  
55  
56  
57  
58  
59  
60  
China. The Notice of Ministry of Health General Office of the Announcement of the  
List of National Model Community Health Care Centers in 2011, 2011.

<http://www.nhfpc.gov.cn/zwgkzt/wsbysj/201112/53666.shtml> (accessed 24 May,  
2018). (In Chinese)

45. National Health and Family Planning Commission of the People's Republic of  
China. The Notice of Ministry of Health General Office of the Announcement of the  
List of National Model Community Health Care Centers in 2012, 2012.

<http://www.nhfpc.gov.cn/zwgkzt/wsbysj/201211/56380.shtml> (accessed 24 May,  
2018). (In Chinese)

46. National Health Commission of the People's Republic of China. The Notice of the  
General Office of the National Health and Family Planning Commission on the  
Announcement of the List of National Model Community Health Care Centers in  
2013, 2013.

[http://www.nhfpc.gov.cn/jws/s3581r/201310/efaefdd8d2d147fb8781d6bef5ecad53.sht](http://www.nhfpc.gov.cn/jws/s3581r/201310/efaefdd8d2d147fb8781d6bef5ecad53.shtml)  
ml (accessed 24 May, 2018). (In Chinese)

- 1  
2  
3  
4 47. The Central People's Government of the People's Republic of China. Decision of  
5  
6 the Standing Committee of the National People's Congress Regarding the  
7  
8  
9 Amendment to the Individual Income Tax Law of the People's Republic of China,  
10  
11 2011. [http://www.gov.cn/flfg/2011-07/01/content\\_1897307.htm](http://www.gov.cn/flfg/2011-07/01/content_1897307.htm) (accessed 24 May  
12  
13 2018). (In Chinese)  
14  
15  
16  
17 48. Zhou B-F, Cooperative Meta-Analysis Group of the Working Group on Obesity in  
18  
19 C. Predictive values of body mass index and waist circumference for risk factors of  
20  
21 certain related diseases in Chinese adults--study on optimal cut-off points of body  
22  
23 mass index and waist circumference in Chinese adults. *Biomedical and environmental*  
24  
25 *sciences : BES* 2002;15(1):83-96.  
26  
27  
28  
29  
30 49. Zhou BF. Effect of body mass index on all-cause mortality and incidence of  
31  
32 cardiovascular diseases--report for meta-analysis of prospective studies open optimal  
33  
34 cut-off points of body mass index in Chinese adults. *Biomedical and environmental*  
35  
36 *sciences : BES* 2002;15(3):245-52. [published Online First: 2002/12/26]  
37  
38  
39  
40 50. Chen C, Lu FC. The guidelines for prevention and control of overweight and  
41  
42 obesity in Chinese adults. *Biomedical and environmental sciences : BES* 2004;17  
43  
44 Suppl:1-36. [published Online First: 2005/04/06]  
45  
46  
47  
48 51. Alberti KG, Zimmet P, Shaw J. International Diabetes Federation: a consensus on  
49  
50 Type 2 diabetes prevention. *Diabetic medicine : a journal of the British Diabetic*  
51  
52 *Association* 2007;24(5):451-63. doi: 10.1111/j.1464-5491.2007.02157.x [published  
53  
54 Online First: 2007/05/02]  
55  
56  
57  
58 52. National Institute for Health and Care Excellence. BMI: preventing ill health and  
59  
60

1  
2  
3  
4 premature death in black, Asian and other minority ethnic groups, 2013.

5  
6 <https://www.nice.org.uk/guidance/ph46/chapter/1-Recommendations> (accessed 23  
7  
8  
9 July, 2018).

10  
11 53. Liu N, Zhang J, Yu X, et al. Development and testing of reliability and validity of  
12  
13 self-management scale for patients with hypertension 高血压病人自我管理量表的  
14  
15 研制与信效度检验. *Chinese Nursing Research 护理研究: 中旬版*  
16  
17 2015;29(5):1764-67.

18  
19  
20  
21 54. Liu L. 2010 Chinese guidelines for the management of hypertension. *Zhonghua*  
22  
23 *xin xue guan bing za zhi* 2011;39(7):579-615.

24  
25  
26  
27 55. Sedgwick P. Cross sectional studies: advantages and disadvantages. *BMJ: British*  
28  
29 *Medical Journal (Online)* 2014;348

30  
31  
32 56. Palmer PB, O'Connell DG. Regression Analysis for Prediction: Understanding the  
33  
34 Process. *Cardiopulmonary Physical Therapy Journal* 2009;20(3):23-6.

35  
36  
37 57. Abegaz TM, Shehab A, Gebreyohannes EA, et al. Nonadherence to  
38  
39 antihypertensive drugs: a systematic review and meta-analysis. *Medicine* 2017;96(4)

40  
41  
42 58. Paulsen MS, Andersen M, Munck AP, et al. Socio-economic status influences  
43  
44 blood pressure control despite equal access to care. *Fam Pract* 2012;29(5):503-10.  
45  
46 doi: 10.1093/fampra/cm130 [published Online First: 2012/01/12]

47  
48  
49 59. Leng B, Jin Y, Li G, et al. Socioeconomic status and hypertension: a meta-  
50  
51 analysis. *Journal of hypertension* 2015;33(2):221-29.

52  
53  
54 60. Moser KA, Agrawal S, Smith GD, et al. Socio-demographic inequalities in the  
55  
56 prevalence, diagnosis and management of hypertension in India: analysis of  
57  
58  
59  
60

1  
2  
3  
4 nationally-representative survey data. *PloS one* 2014;9(1):e86043.

5  
6 61. Liu GG, Vortherms SA, Hong X. China's Health Reform Update. *Annual Review*  
7  
8  
9  
10  
11  
12  
13  
14  
15  
16  
17  
18  
19  
20  
21  
22  
23  
24  
25  
26  
27  
28  
29  
30  
31  
32  
33  
34  
35  
36  
37  
38  
39  
40  
41  
42  
43  
44  
45  
46  
47  
48  
49  
50  
51  
52  
53  
54  
55  
56  
57  
58  
59  
60  
of *Public Health* 2017;38(1):431-48. doi: 10.1146/annurev-publhealth-031816-044247

62. Feng XL, Pang M, Beard J. Health system strengthening and hypertension awareness, treatment and control: data from the China Health and Retirement Longitudinal Study. *Bulletin of the World Health Organization* 2014;92(1):29-41. doi: 10.2471/blt.13.124495 [published Online First: 2014/01/07]

63. Liu J, Shi L, Meng Q, et al. Income-related inequality in health insurance coverage: analysis of China Health and Nutrition Survey of 2006 and 2009. *International journal for equity in health* 2012;11(1):42. doi: 10.1186/1475-9276-11-42

64. Duru OK, Vargas RB, Kermah D, et al. Health Insurance Status and Hypertension Monitoring and Control in the United States. *American journal of hypertension* 2007;20(4):348-53. doi: 10.1016/j.amjhyper.2006.11.007

65. Munger MA, Van Tassell BW, LaFleur J. Medication nonadherence: an unrecognized cardiovascular risk factor. *Medscape General Medicine* 2007;9(3):58. [published Online First: 2007/12/20]

66. Wang W, Lau Y, Loo A, et al. Medication adherence and its associated factors among Chinese community-dwelling older adults with hypertension. *Heart & Lung: The Journal of Acute and Critical Care* 2014;43(4):278-83.

67. Yue Z, Bin W, Weilin Q, et al. Effect of medication adherence on blood pressure

- 1  
2  
3  
4 control and risk factors for antihypertensive medication adherence. *Journal of*  
5  
6 *evaluation in clinical practice* 2015;21(1):166-72.  
7  
8  
9 68. Borzecki AM, Glickman ME, Kader B, et al. The effect of age on hypertension  
10  
11 control and management. *American journal of hypertension* 2006;19(5):520-27.  
12  
13  
14 69. Violán C, Foguet-Boreu Q, Roso-Llorach A, et al. Burden of multimorbidity,  
15  
16 socioeconomic status and use of health services across stages of life in urban areas: a  
17  
18 cross-sectional study. *BMC public health* 2014;14(1):530.  
19  
20  
21  
22 70. Noh J, Kim HC, Shin A, et al. Prevalence of Comorbidity among People with  
23  
24 Hypertension: The Korea National Health and Nutrition Examination Survey 2007-  
25  
26 2013. *Korean circulation journal* 2016;46(5):672-80.  
27  
28  
29  
30 71. Chriss PM, Sheposh J, Carlson B, et al. Predictors of successful heart failure self-  
31  
32 care maintenance in the first three months after hospitalization. *Heart & lung : the*  
33  
34 *journal of critical care* 2004;33(6):345-53. [published Online First: 2004/12/15]  
35  
36  
37  
38 72. Ma C. A cross-sectional survey of medication adherence and associated factors for  
39  
40 rural patients with hypertension. *Applied Nursing Research* 2016;31:94-99.  
41  
42  
43 73. Li YT, Wang HH, Liu KQ, et al. Medication adherence and blood pressure control  
44  
45 among hypertensive patients with coexisting long-term conditions in primary care  
46  
47 settings: A cross-sectional analysis. *Medicine* 2016;95(20)  
48  
49  
50  
51 74. Smith PM, Koehoorn M. Measuring gender when you don't have a gender  
52  
53 measure: constructing a gender index using survey data. *International journal for*  
54  
55 *equity in health* 2016;15:82. doi: 10.1186/s12939-016-0370-4 [published Online First:  
56  
57 2016/05/29]  
58  
59  
60



- 1  
2  
3  
4 75. Rahman M, Williams G, Al Mamun A. Gender differences in hypertension  
5  
6 awareness, antihypertensive use and blood pressure control in Bangladeshi adults:  
7  
8 findings from a national cross-sectional survey. *Journal of Health, Population and*  
9  
10 *Nutrition* 2017;36(1):23.  
11  
12  
13  
14 76. Chu SH, Baek JW, Kim ES, et al. Gender differences in hypertension control  
15  
16 among older Korean adults: Korean social life, health, and aging project. *Journal of*  
17  
18 *Preventive Medicine and Public Health* 2015;48(1):38.  
19  
20  
21  
22 77. Ryan P, Sawin KJ. The Individual and Family Self-Management Theory:  
23  
24 Background and perspectives on context, process, and outcomes. *Nursing Outlook*  
25  
26 2009;57(4):217-25.e6. doi: <https://doi.org/10.1016/j.outlook.2008.10.004>  
27  
28  
29  
30 78. Chobanian AV, Bakris GL, Black HR, et al. Seventh report of the Joint National  
31  
32 Committee on Prevention, Detection, Evaluation, and Treatment of High Blood  
33  
34 Pressure. *Hypertension* 2003;42(6):1206-52. doi:  
35  
36 10.1161/01.HYP.0000107251.49515.c2 [published Online First: 2003/12/06]  
37  
38  
39  
40 79. Nguyen QC, Needham Waddell E, Kerker BD, et al. Awareness, Treatment, and  
41  
42 Control of Hypertension and Hypercholesterolemia Among Insured Residents of New  
43  
44 York City, 2004. *Preventing chronic disease* 2011;8(5)  
45  
46  
47  
48 80. Wogen J. Patient adherence with hypertension medication. *Journal of Managed*  
49  
50 *Care Pharmacy* 2004;10(1):90-91.  
51  
52  
53  
54 81. Morisky DE, Ang A, Krousel - Wood M, et al. Predictive validity of a medication  
55  
56 adherence measure in an outpatient setting. *The Journal of Clinical Hypertension*  
57  
58 2008;10(5):348-54.  
59  
60

- 1  
2  
3  
4 82. King-Shier KM, Singh S, Khan NA, et al. Ethno-Cultural Considerations in  
5  
6 Cardiac Patients' Medication Adherence. *Clinical nursing research* 2017;26(5):576-  
7  
8  
9 91. doi: 10.1177/1054773816646078  
10  
11 83. Hsu Y-H, Mao C-L, Wey M. Antihypertensive medication adherence among  
12  
13 elderly Chinese Americans. *Journal of Transcultural Nursing* 2010;21(4):297-305.  
14  
15  
16 84. Li W-W, Stewart AL, Stotts N, et al. Cultural factors associated with  
17  
18 antihypertensive medication adherence in Chinese immigrants. *Journal of*  
19  
20  
21  
22  
23  
24  
25 85. McManus RJ, Mant J, Haque MS, et al. Effect of self-monitoring and medication  
26  
27 self-titration on systolic blood pressure in hypertensive patients at high risk of  
28  
29 cardiovascular disease: the TASMIN-SR randomized clinical trial. *Jama*  
30  
31  
32 2014;312(8):799-808.  
33  
34  
35 86. Stergiou GS, Kollias A, Zeniodi M, et al. Home blood pressure monitoring:  
36  
37 primary role in hypertension management. *Current hypertension reports*  
38  
39  
40 2014;16(8):462.  
41  
42  
43 87. Choi HM, Kim HC, Kang DR. Sex differences in hypertension prevalence and  
44  
45 control: Analysis of the 2010-2014 Korea National Health and Nutrition Examination  
46  
47 Survey. *PloS one* 2017;12(5):e0178334. doi: 10.1371/journal.pone.0178334  
48  
49  
50 88. Zhou H, Wang K, Zhou X, et al. Prevalence and Gender-Specific Influencing  
51  
52 Factors of Hypertension among Chinese Adults: A Cross-Sectional Survey Study in  
53  
54 Nanchang, China. *International journal of environmental research and public health*  
55  
56 2018;15(2) doi: 10.3390/ijerph15020382 [published Online First: 2018/02/24]  
57  
58  
59  
60

**Table 1 Characteristics of community participants with hypertension**

|                         | <b>Total</b>   | <b>Men</b>     | <b>Women</b>   | <b>p Value</b> |
|-------------------------|----------------|----------------|----------------|----------------|
|                         | <b>(n=873)</b> | <b>(n=360)</b> | <b>(n=513)</b> |                |
|                         | Mean (SD)/     | Mean (SD)/     | Mean (SD)/     |                |
|                         | n (%)          | n (%)          | n (%)          |                |
| Age (years)             | 65 (9.5)       | 65 (9.9)       | 66 (9.2)       | 0.075          |
| Marriage Status         |                |                |                | <0.001         |
| Married                 | 757 (86.7)     | 346 (96.1)     | 411 (80.1)     |                |
| Single/Divorced/Widowed | 116 (13.3)     | 14 (3.9)       | 102 (19.9)     |                |
| Education               |                |                |                | <0.001         |
| Primary school or no    | 183 (21.0)     | 53 (14.7)      | 130 (25.3)     |                |
| High school             | 544 (62.3)     | 232 (64.4)     | 312 (60.8)     |                |
| College or higher       | 146 (16.7)     | 75 (20.8)      | 71 (13.8)      |                |
| Employment              |                |                |                | <0.001         |
| Employed                | 145 (16.6)     | 91 (25.3)      | 54 (10.5)      |                |
| Unemployed              | 132 (15.1)     | 44 (12.2)      | 88 (17.2)      |                |
| Retired                 | 596 (68.3)     | 225 (62.5)     | 371 (72.3)     |                |
| Personal Incomes        |                |                |                | <0.001         |
| ≤ ¥1500 (US\$225)       | 307 (35.2)     | 94 (26.1)      | 213 (41.5)     |                |
| > ¥1500 (US\$225)       | 566 (64.8)     | 266 (73.9)     | 300 (58.5)     |                |
| Health Insurance        |                |                |                | 0.170          |

|    |                          |            |            |            |        |
|----|--------------------------|------------|------------|------------|--------|
| 1  |                          |            |            |            |        |
| 2  |                          |            |            |            |        |
| 3  |                          |            |            |            |        |
| 4  | UEMI                     | 636 (72.9) | 271 (75.3) | 365 (71.2) |        |
| 5  |                          |            |            |            |        |
| 6  | URMI                     | 103 (11.8) | 32 (8.9)   | 71 (13.8)  |        |
| 7  |                          |            |            |            |        |
| 8  |                          |            |            |            |        |
| 9  | NCMS                     | 100 (11.5) | 43 (11.9)  | 57 (11.1)  |        |
| 10 |                          |            |            |            |        |
| 11 | Uninsured                | 34 (3.9)   | 14 (3.9)   | 20 (3.9)   |        |
| 12 |                          |            |            |            |        |
| 13 |                          |            |            |            |        |
| 14 | BMI                      |            |            |            |        |
| 15 |                          |            |            |            |        |
| 16 | Underweight              | 10 (1.1)   | 2 (0.6)    | 8 (1.6)    | 0.377  |
| 17 |                          |            |            |            |        |
| 18 | Normal                   | 304 (34.8) | 120 (33.3) | 184 (35.9) |        |
| 19 |                          |            |            |            |        |
| 20 | Overweight               | 412 (47.2) | 178 (49.4) | 234 (45.6) |        |
| 21 |                          |            |            |            |        |
| 22 | Obese                    | 147 (16.8) | 60 (16.7)  | 87 (17.0)  |        |
| 23 |                          |            |            |            |        |
| 24 |                          |            |            |            |        |
| 25 |                          |            |            |            |        |
| 26 |                          |            |            |            |        |
| 27 | WC                       |            |            |            |        |
| 28 |                          |            |            |            |        |
| 29 | Normal                   | 229 (26.2) | 144 (40.0) | 85 (16.6)  | <0.001 |
| 30 |                          |            |            |            |        |
| 31 | Obese                    | 644 (73.8) | 216 (60.0) | 428 (83.4) |        |
| 32 |                          |            |            |            |        |
| 33 |                          |            |            |            |        |
| 34 |                          |            |            |            |        |
| 35 | Smoking Status           |            |            |            | <0.001 |
| 36 |                          |            |            |            |        |
| 37 | Smoking                  | 239 (27.4) | 216 (60.0) | 23 (4.5)   |        |
| 38 |                          |            |            |            |        |
| 39 | Non-smoking              | 634 (72.6) | 144 (40.0) | 490 (95.5) |        |
| 40 |                          |            |            |            |        |
| 41 |                          |            |            |            |        |
| 42 |                          |            |            |            |        |
| 43 | Drinking Status          |            |            |            | <0.001 |
| 44 |                          |            |            |            |        |
| 45 | Drinking                 | 196 (22.5) | 176 (48.9) | 20 (3.9)   |        |
| 46 |                          |            |            |            |        |
| 47 | Non-drinking             | 677 (77.5) | 184 (51.1) | 493 (96.1) |        |
| 48 |                          |            |            |            |        |
| 49 |                          |            |            |            |        |
| 50 |                          |            |            |            |        |
| 51 | Family History           |            |            |            | 0.944  |
| 52 |                          |            |            |            |        |
| 53 | Yes                      | 533 (61.1) | 219 (60.8) | 314 (61.2) |        |
| 54 |                          |            |            |            |        |
| 55 | No                       | 340 (38.9) | 141 (39.2) | 199 (38.8) |        |
| 56 |                          |            |            |            |        |
| 57 |                          |            |            |            |        |
| 58 | Disease Duration (years) | 10 (9.0)   | 9 (7.9)    | 10 (9.7)   | 0.079  |
| 59 |                          |            |            |            |        |
| 60 |                          |            |            |            |        |

## Comorbidities

|                          |            |            |            |       |
|--------------------------|------------|------------|------------|-------|
| CAD                      | 195 (22.3) | 75 (20.8)  | 120 (23.4) | 0.370 |
| Back/Neck problem        | 97 (11.1)  | 27 (7.5)   | 70 (13.6)  | 0.004 |
| Stroke                   | 96 (11.0)  | 44 (12.2)  | 52 (10.1)  | 0.334 |
| Diabetes                 | 91 (10.4)  | 35 (9.7)   | 56 (10.9)  | 0.569 |
| Arthritis                | 61 (7.0)   | 18 (5.0)   | 43 (8.4)   | 0.049 |
| COPD                     | 55 (6.3)   | 24 (6.7)   | 31 (6.0)   | 0.710 |
| MI                       | 17 (1.9)   | 10 (2.8)   | 7 (1.4)    | 0.141 |
| Nephropathy              | 11 (1.3)   | 7 (1.9)    | 4 (0.8)    | 0.132 |
| Gastrointestinal disease | 10 (1.1)   | 5 (1.4)    | 5 (1.0)    | 0.574 |
| 0                        | 401 (45.9) | 184 (51.1) | 217 (42.3) | 0.010 |
| ≥1                       | 472 (54.1) | 176 (48.9) | 296 (57.7) |       |
| BP Control               |            |            |            | 0.242 |
| Good control             | 287 (32.9) | 110 (30.6) | 177 (34.5) |       |
| Poor control             | 586 (67.1) | 250 (69.4) | 336 (65.5) |       |

UEMI, urban employees' medical insurance; URMI, urban residents' medical insurance; NCMS, new rural cooperative medical scheme; BMI, body mass index; WC, waist circumference; CAD, coronary artery disease; COPD, chronic obstructive pulmonary disease; MI, myocardial infarction; BP, blood pressure.

**Table 2** Difference in self-management processes in community participants with hypertension

|                                        | <b>Total</b>   | <b>Men</b>     | <b>Women</b>   | <b>p Value</b> |
|----------------------------------------|----------------|----------------|----------------|----------------|
|                                        | <b>(n=873)</b> | <b>(n=360)</b> | <b>(n=513)</b> |                |
|                                        | Mean (SD)      | Mean (SD)      | Mean (SD)      |                |
| Treatment Management                   | 59.54 (17.43)  | 59.49 (18.01)  | 59.58 (17.02)  | 0.937          |
| Diet Management                        | 70.18 (23.36)  | 67.71 (24.18)  | 71.91 (22.63)  | 0.009          |
| Physical Exercise Management           | 60.80 (32.69)  | 59.63 (33.21)  | 61.62 (32.33)  | 0.377          |
| Lifestyle Management                   | 63.47 (18.38)  | 64.92 (17.91)  | 62.45 (18.66)  | 0.051          |
| Risk Factors Management                | 86.91 (24.64)  | 73.70 (30.53)  | 96.18 (13.12)  | <0.001         |
| Total Score                            | 65.58 (13.22)  | 63.61 (14.28)  | 66.96 (12.25)  | <0.001         |
| No. of Visiting CHC (year), n (%)      |                |                |                | 0.060          |
| 0                                      | 322 (36.9)     | 146 (40.6)     | 176 (34.3)     |                |
| ≥1                                     | 551 (63.1)     | 214 (59.4)     | 337 (65.7)     |                |
| No. of Visiting Hospital (year), n (%) |                |                |                | 0.001          |
| 0                                      | 653 (74.8)     | 290 (80.6)     | 363 (70.8)     |                |
| ≥1                                     | 220 (25.2)     | 70 (19.4)      | 150 (29.2)     |                |

CHC, Community health centers.

**Table 3** Logistic regression of blood pressure control among community participants with hypertension

|                              | Model 1 |      |      | Model 2 |      |      | Model 3 |       |      |      |      |       |
|------------------------------|---------|------|------|---------|------|------|---------|-------|------|------|------|-------|
|                              | OR      | CI   | p    | OR      | CI   | p    | OR      | CI    | p    |      |      |       |
| Age (year)                   | 1.00    | 0.98 | 1.02 | 0.965   | 0.99 | 0.98 | 1.01    | 0.545 | 1.00 | 0.98 | 1.02 | 0.600 |
| Sex (vs. male)               | 0.76    | 0.55 | 1.03 | 0.080   | 0.85 | 0.56 | 1.29    | 0.445 | 0.80 | 0.52 | 1.24 | 0.314 |
| Marital Status (vs. married) | 1.27    | 0.80 | 2.02 | 0.319   | 1.25 | 0.78 | 2.01    | 0.349 | 1.20 | 0.74 | 1.94 | 0.470 |
| Education                    |         |      |      | 0.327   |      |      |         | 0.463 |      |      |      | 0.652 |
| HS (vs. college)             | 1.32    | 0.87 | 1.99 | 0.191   | 1.28 | 0.84 | 1.95    | 0.247 | 1.22 | 0.79 | 1.87 | 0.378 |
| PS (vs. college)             | 1.50    | 0.80 | 2.80 | 0.204   | 1.37 | 0.72 | 2.58    | 0.339 | 1.25 | 0.65 | 2.40 | 0.496 |
| Employment                   |         |      |      | 0.163   |      |      |         | 0.148 |      |      |      | 0.218 |
| Unemployed (vs. employed)    | 0.84    | 0.44 | 1.64 | 0.617   | 0.87 | 0.44 | 1.70    | 0.673 | 0.84 | 0.42 | 1.66 | 0.611 |
| Retired (vs. employed)       | 0.65    | 0.41 | 1.02 | 0.062   | 0.64 | 0.40 | 1.02    | 0.059 | 0.66 | 0.41 | 1.06 | 0.86  |
| Income (vs. >¥1500 )         | 2.54    | 0.78 | 8.33 | 0.123   | 2.68 | 0.80 | 8.93    | 0.109 | 2.41 | 0.71 | 8.12 | 0.157 |

|                            |      |      |      |       |      |      |      |       |      |      |      |       |
|----------------------------|------|------|------|-------|------|------|------|-------|------|------|------|-------|
| Health Insurance           |      |      |      | 0.075 |      |      |      | 0.082 |      |      |      | 0.182 |
| URMI (vs. UEMI)            | 1.13 | 0.69 | 1.84 | 0.624 | 1.10 | 0.67 | 1.79 | 0.717 | 0.97 | 0.58 | 1.63 | 0.920 |
| NCMS (vs. UEMI)            | 2.70 | 1.28 | 5.67 | 0.009 | 2.69 | 1.27 | 5.69 | 0.010 | 2.26 | 1.06 | 4.81 | 0.034 |
| Uninsured (vs. UEMI)       | 1.35 | 0.55 | 3.33 | 0.516 | 1.27 | 0.51 | 3.16 | 0.607 | 1.14 | 0.45 | 2.86 | 0.787 |
| Education*Income           |      |      |      | 0.460 |      |      |      | 0.426 |      |      |      | 0.410 |
| HS*Income (<¥ 1500)        | 0.53 | 0.15 | 1.84 | 0.319 | 0.52 | 0.15 | 1.84 | 0.312 | 0.54 | 0.15 | 1.92 | 0.338 |
| PS*Income (<¥ 1500)        | 0.78 | 0.19 | 3.12 | 0.722 | 0.79 | 0.19 | 3.24 | 0.745 | 0.86 | 0.21 | 3.56 | 0.830 |
| BMI (kg/m <sup>2</sup> )   |      |      |      |       | 1.01 | 0.95 | 1.06 | 0.868 | 1.00 | 0.95 | 1.06 | 0.972 |
| WC (vs. normal)            |      |      |      |       | 1.14 | 0.76 | 1.69 | 0.535 | 1.12 | 0.75 | 1.69 | 0.585 |
| Smoking (vs. non-smoker)   |      |      |      |       | 1.38 | 0.87 | 2.21 | 0.173 | 1.52 | 0.93 | 2.51 | 0.099 |
| Drinking (vs. no-drinking) |      |      |      |       | 1.02 | 0.65 | 1.62 | 0.926 | 0.95 | 0.58 | 1.56 | 0.833 |
| Family History (vs. no)    |      |      |      |       | 0.84 | 0.62 | 1.15 | 0.283 | 0.89 | 0.65 | 1.23 | 0.484 |
| Disease Duration (years)   |      |      |      |       | 1.03 | 1.01 | 1.04 | 0.006 | 1.03 | 1.01 | 1.04 | 0.008 |



1  
2  
3  
4  
5  
6  
7  
8  
9  
10  
11  
12  
13  
14  
15  
16  
17  
18  
19  
20  
21  
22  
23  
24  
25  
26  
27  
28  
29  
30  
31  
32  
33  
34  
35  
36  
37  
38  
39  
40  
41  
42  
43  
44  
45  
46

|                                 |          |       |          |       |          |       |      |      |      |       |
|---------------------------------|----------|-------|----------|-------|----------|-------|------|------|------|-------|
| Comorbidities (vs. no)          |          |       | 1.13     | 0.83  | 1.54     | 0.443 | 1.14 | 0.83 | 1.56 | 0.430 |
| Treatment Management            |          |       |          |       |          |       | 0.98 | 0.97 | 0.99 | 0.000 |
| Diet Management                 |          |       |          |       |          |       | 1.00 | 0.99 | 1.01 | 0.639 |
| Physical Exercise Management    |          |       |          |       |          |       | 1.00 | 0.99 | 1.00 | 0.711 |
| Lifestyle Management            |          |       |          |       |          |       | 1.00 | 0.99 | 1.01 | 0.449 |
| Risk Factor Management          |          |       |          |       |          |       | 1.00 | 0.99 | 1.01 | 0.381 |
| No. of Visiting CHC (year)      |          |       |          |       |          |       | 1.00 | 0.98 | 1.03 | 0.743 |
| No. of Visiting Hospital (year) |          |       |          |       |          |       | 0.99 | 0.92 | 1.07 | 0.800 |
| Chi-square                      | 57.249   | df=13 | 70.298   | df=20 | 95.032   | df=27 |      |      |      |       |
| ΔChi-square                     | 57.249   | df=13 | 13.048   | df=8  | 24.734   | df=7  |      |      |      |       |
| -2 Loglikelihood                | 1048.476 |       | 1035.428 |       | 1010.694 |       |      |      |      |       |

---

HS, high school; PS, primary school; UEMI, urban employees' medical insurance; URMI, urban residents' medical insurance; NCMS, new rural cooperative medical scheme; BMI, body mass index; WC, waist circumference; CHC, community health centers.

1  
2  
3  
4 **Figure Legend**  
5

6 *Figure 1.* A flowchart of included and excluded cases.  
7  
8  
9  
10  
11  
12  
13  
14  
15  
16  
17  
18  
19  
20  
21  
22  
23  
24  
25  
26  
27  
28  
29  
30  
31  
32  
33  
34  
35  
36  
37  
38  
39  
40  
41  
42  
43  
44  
45  
46  
47  
48  
49  
50  
51  
52  
53  
54  
55  
56  
57  
58  
59  
60

For peer review only

1  
2  
3  
4  
5  
6  
7  
8  
9  
10  
11  
12  
13  
14  
15  
16  
17  
18  
19  
20  
21  
22  
23  
24  
25  
26  
27  
28  
29  
30  
31  
32  
33  
34  
35  
36  
37  
38  
39  
40  
41  
42  
43  
44  
45  
46  
47  
48  
49  
50  
51  
52  
53  
54  
55  
56  
57  
58  
59  
60

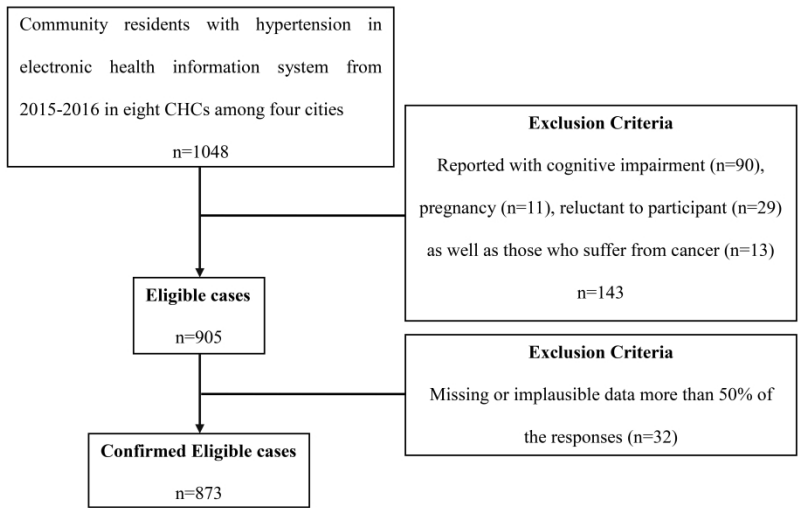

Figure 1. A flowchart of included and excluded cases.

1  
2  
3  
4  
5  
6  
7  
8  
9  
10  
11  
12  
13  
14  
15  
16  
17  
18  
19  
20  
21  
22  
23  
24  
25  
26  
27  
28  
29  
30  
31  
32  
33  
34  
35  
36  
37  
38  
39  
40  
41  
42  
43  
44  
45  
46

### Translation of self-management scale for patients with hypertension

| Self-management Scale for Patients with Hypertension |                                                                                                                 |       |              |           |                       |        |
|------------------------------------------------------|-----------------------------------------------------------------------------------------------------------------|-------|--------------|-----------|-----------------------|--------|
|                                                      |                                                                                                                 | Never | Occasionally | Sometimes | Frequently<br>(Often) | Always |
|                                                      | <b>Treatment Management</b>                                                                                     |       |              |           |                       |        |
| 1                                                    | Check your blood pressure                                                                                       |       |              |           |                       |        |
| 2                                                    | Visiting a doctor when the blood pressure fluctuates too much                                                   |       |              |           |                       |        |
| 3                                                    | Take medications as prescribed                                                                                  |       |              |           |                       |        |
| 4                                                    | Use a method to help you remember to take your medications on time<br>(e.g., use a pill box or other reminders) |       |              |           |                       |        |
| 5                                                    | Keep doctor or nurse appointments                                                                               |       |              |           |                       |        |
| 6                                                    | Adjusting antihypertensive medications yourself at home based on the<br>level of blood pressure                 |       |              |           |                       |        |

1  
2  
3  
4  
5  
6  
7  
8  
9  
10  
11  
12  
13  
14  
15  
16  
17  
18  
19  
20  
21  
22  
23  
24  
25  
26  
27  
28  
29  
30  
31  
32  
33  
34  
35  
36  
37  
38  
39  
40  
41  
42  
43  
44  
45  
46

|    |                                                                                         |  |  |  |  |  |
|----|-----------------------------------------------------------------------------------------|--|--|--|--|--|
| 7  | Forget to take antihypertensive medications                                             |  |  |  |  |  |
| 8  | Buy and take antihypertensive medications from recommendation of friends or advertising |  |  |  |  |  |
|    | <b>Diet Management</b>                                                                  |  |  |  |  |  |
| 9  | Eat your meals on time and eat a balanced meal.                                         |  |  |  |  |  |
| 10 | Eat a low-salt diet (eat 6 grams or less than 6 grams of salt daily)                    |  |  |  |  |  |
|    | <b>Physical Exercise Management</b>                                                     |  |  |  |  |  |
| 11 | Choose an appropriate exercise (e.g., jogging, Tai Chi, etc.)                           |  |  |  |  |  |
| 12 | Exercise more than 3 days per week, longer than 30 minutes each time                    |  |  |  |  |  |
| 13 | Exercise at least 30 minutes after your meal                                            |  |  |  |  |  |
|    | <b>Lifestyle Management</b>                                                             |  |  |  |  |  |
| 14 | Get adequate sleep                                                                      |  |  |  |  |  |
| 15 | Maintain a healthy bowel regime (i.e., maintain regular bowel habits                    |  |  |  |  |  |

|    |                                                              |  |  |  |  |  |
|----|--------------------------------------------------------------|--|--|--|--|--|
|    | or normal bowel movements)                                   |  |  |  |  |  |
| 16 | Engage in social activities                                  |  |  |  |  |  |
| 17 | Try to lose weight or control body weight                    |  |  |  |  |  |
| 18 | Keep your mood stable                                        |  |  |  |  |  |
|    | <b>Risk Factor Management</b>                                |  |  |  |  |  |
| 19 | Smoking                                                      |  |  |  |  |  |
| 20 | Drinking (daily amount of alcohol intake more than 25 grams) |  |  |  |  |  |
| 21 | Overstrained or excessive pressure at work                   |  |  |  |  |  |

**STROBE 2007 (v4) Statement—Checklist of items that should be included in reports of *cross-sectional studies***

| Section/Topic                | Item # | Recommendation                                                                                                                                                                       | Reported on page # |
|------------------------------|--------|--------------------------------------------------------------------------------------------------------------------------------------------------------------------------------------|--------------------|
| <b>Title and abstract</b>    | 1      | (a) Indicate the study’s design with a commonly used term in the title or the abstract                                                                                               | 1                  |
|                              |        | (b) Provide in the abstract an informative and balanced summary of what was done and what was found                                                                                  | 2-3                |
| <b>Introduction</b>          |        |                                                                                                                                                                                      |                    |
| Background/rationale         | 2      | Explain the scientific background and rationale for the investigation being reported                                                                                                 | 4-6                |
| Objectives                   | 3      | State specific objectives, including any prespecified hypotheses                                                                                                                     | 6                  |
| <b>Methods</b>               |        |                                                                                                                                                                                      |                    |
| Study design                 | 4      | Present key elements of study design early in the paper                                                                                                                              | 6-7                |
| Setting                      | 5      | Describe the setting, locations, and relevant dates, including periods of recruitment, exposure, follow-up, and data collection                                                      | 6-7                |
| Participants                 | 6      | (a) Give the eligibility criteria, and the sources and methods of selection of participants                                                                                          | 7-8                |
| Variables                    | 7      | Clearly define all outcomes, exposures, predictors, potential confounders, and effect modifiers. Give diagnostic criteria, if applicable                                             | 8-10               |
| Data sources/<br>measurement | 8*     | For each variable of interest, give sources of data and details of methods of assessment (measurement). Describe comparability of assessment methods if there is more than one group | 8-10               |
| Bias                         | 9      | Describe any efforts to address potential sources of bias                                                                                                                            | 10                 |
| Study size                   | 10     | Explain how the study size was arrived at                                                                                                                                            | 10                 |
| Quantitative variables       | 11     | Explain how quantitative variables were handled in the analyses. If applicable, describe which groupings were chosen and why                                                         | 10-11              |
| Statistical methods          | 12     | (a) Describe all statistical methods, including those used to control for confounding                                                                                                | 10-11              |
|                              |        | (b) Describe any methods used to examine subgroups and interactions                                                                                                                  | N/A                |
|                              |        | (c) Explain how missing data were addressed                                                                                                                                          | 11-12              |
|                              |        | (d) If applicable, describe analytical methods taking account of sampling strategy                                                                                                   | N/A                |
|                              |        | (e) Describe any sensitivity analyses                                                                                                                                                | N/A                |
| <b>Results</b>               |        |                                                                                                                                                                                      |                    |

|                          |     |                                                                                                                                                                                                              |               |
|--------------------------|-----|--------------------------------------------------------------------------------------------------------------------------------------------------------------------------------------------------------------|---------------|
| Participants             | 13* | (a) Report numbers of individuals at each stage of study—eg numbers potentially eligible, examined for eligibility, confirmed eligible, included in the study, completing follow-up, and analysed            | 11-12         |
|                          |     | (b) Give reasons for non-participation at each stage                                                                                                                                                         | 11-12         |
|                          |     | (c) Consider use of a flow diagram                                                                                                                                                                           | 12 (Figure 1) |
| Descriptive data         | 14* | (a) Give characteristics of study participants (eg demographic, clinical, social) and information on exposures and potential confounders                                                                     | 12 (Table 1)  |
|                          |     | (b) Indicate number of participants with missing data for each variable of interest                                                                                                                          | N/A           |
| Outcome data             | 15* | Report numbers of outcome events or summary measures                                                                                                                                                         | 13            |
| Main results             | 16  | (a) Give unadjusted estimates and, if applicable, confounder-adjusted estimates and their precision (eg, 95% confidence interval). Make clear which confounders were adjusted for and why they were included | N/A           |
|                          |     | (b) Report category boundaries when continuous variables were categorized                                                                                                                                    | N/A           |
|                          |     | (c) If relevant, consider translating estimates of relative risk into absolute risk for a meaningful time period                                                                                             | N/A           |
| Other analyses           | 17  | Report other analyses done—eg analyses of subgroups and interactions, and sensitivity analyses                                                                                                               | N/A           |
| <b>Discussion</b>        |     |                                                                                                                                                                                                              |               |
| Key results              | 18  | Summarise key results with reference to study objectives                                                                                                                                                     | 13-17         |
| Limitations              | 19  | Discuss limitations of the study, taking into account sources of potential bias or imprecision. Discuss both direction and magnitude of any potential bias                                                   | 17-18         |
| Interpretation           | 20  | Give a cautious overall interpretation of results considering objectives, limitations, multiplicity of analyses, results from similar studies, and other relevant evidence                                   | 13-17         |
| Generalisability         | 21  | Discuss the generalisability (external validity) of the study results                                                                                                                                        | 18            |
| <b>Other information</b> |     |                                                                                                                                                                                                              |               |
| Funding                  | 22  | Give the source of funding and the role of the funders for the present study and, if applicable, for the original study on which the present article is based                                                | 19            |

\*Give information separately for cases and controls in case-control studies and, if applicable, for exposed and unexposed groups in cohort and cross-sectional studies.

**Note:** An Explanation and Elaboration article discusses each checklist item and gives methodological background and published examples of transparent reporting. The STROBE checklist is best used in conjunction with this article (freely available on the Web sites of PLoS Medicine at <http://www.plosmedicine.org/>, Annals of Internal Medicine at <http://www.annals.org/>, and Epidemiology at <http://www.epidem.com/>). Information on the STROBE Initiative is available at [www.strobe-statement.org](http://www.strobe-statement.org).



# BMJ Open

## Self-Management and Blood Pressure Control in China: A Community Based Multicenter Cross-Sectional Study

|                                 |                                                                                                                                                                                                                                                                                                                                                                                                                                                                                                                                                                                                                                                                                 |
|---------------------------------|---------------------------------------------------------------------------------------------------------------------------------------------------------------------------------------------------------------------------------------------------------------------------------------------------------------------------------------------------------------------------------------------------------------------------------------------------------------------------------------------------------------------------------------------------------------------------------------------------------------------------------------------------------------------------------|
| Journal:                        | <i>BMJ Open</i>                                                                                                                                                                                                                                                                                                                                                                                                                                                                                                                                                                                                                                                                 |
| Manuscript ID                   | bmjopen-2018-025819.R2                                                                                                                                                                                                                                                                                                                                                                                                                                                                                                                                                                                                                                                          |
| Article Type:                   | Research                                                                                                                                                                                                                                                                                                                                                                                                                                                                                                                                                                                                                                                                        |
| Date Submitted by the Author:   | 01-Feb-2019                                                                                                                                                                                                                                                                                                                                                                                                                                                                                                                                                                                                                                                                     |
| Complete List of Authors:       | Qu, Zhan; Xi'an Jiaotong University, Health Science Center, School of Nursing<br>Parry, Monica; University of Toronto Lawrence S Bloomberg Faculty of Nursing,<br>Liu, Fang; Xi'an Jiaotong University, Health Science Center, School of Nursing<br>Wen, Xiuling; The First Affiliated Hospital of Xi'an Jiaotong University<br>Li, Jieqiong; The First Affiliated Hospital of Xi'an Jiaotong University<br>Zhang, Yanan; Xi'an Jiaotong University, Health Science Center, School of Public Health<br>Wang, Duolao; Liverpool School of Tropical Medicine, Department of Clinical Sciences<br>Li, Xiaomei; Xi'an Jiaotong University, Health Science Center, School of Nursing |
| <b>Primary Subject Heading</b>: | Nursing                                                                                                                                                                                                                                                                                                                                                                                                                                                                                                                                                                                                                                                                         |
| Secondary Subject Heading:      | Public health                                                                                                                                                                                                                                                                                                                                                                                                                                                                                                                                                                                                                                                                   |
| Keywords:                       | Hypertension < CARDIOLOGY, self-management, community care, sex, gender                                                                                                                                                                                                                                                                                                                                                                                                                                                                                                                                                                                                         |
|                                 |                                                                                                                                                                                                                                                                                                                                                                                                                                                                                                                                                                                                                                                                                 |

SCHOLARONE™  
Manuscripts

1  
2  
3  
4 **Full Title:** Self-Management and Blood Pressure Control in China: A Community  
5  
6 Based Multicenter Cross-Sectional Study  
7

8  
9 **Authors, Degrees and Affiliations:** Zhan Qu BA, MA, RN, PhD Candidate<sup>1</sup>, Monica  
10  
11 Parry NP-Adult PhD<sup>2</sup>, Fang Liu BSc, RN, MSc, PhD<sup>1</sup>, Xiuling Wen BSc, RN, MSc,  
12  
13 PhD<sup>3</sup>, Jieqiong Li BSc, RN, MSc, PhD<sup>3</sup>, Yanan Zhang BSc, RN, MSc<sup>4</sup>, Duolao Wang  
14  
15 PhD<sup>5</sup>, Xiaomei Li BN, MN, RN, PhD<sup>1\*</sup>  
16  
17

18  
19 **Author Details:**  
20

21  
22 <sup>1</sup>School of Nursing, Health Science Center, Xi'an Jiaotong University, Xi'an, Shaanxi,  
23  
24 P. R. China.  
25

26  
27 <sup>2</sup>Lawrence S. Bloomberg Faculty of Nursing, University of Toronto, Toronto, ON,  
28  
29 Canada.  
30

31  
32 <sup>3</sup>The First Affiliated Hospital of Xi'an Jiaotong University, Xi'an Shaanxi, P. R.  
33  
34 China.  
35

36  
37 <sup>4</sup>Institute of Endemic Diseases, School of Public Health, Health Science Center, Xi'an  
38  
39 Jiaotong University, Xi'an, Shaanxi, P. R. China.  
40  
41

42  
43 <sup>5</sup>Department of Clinical Sciences, Liverpool School of Tropical Medicine, Liverpool,  
44  
45 United Kingdom.  
46  
47

48 **Correspondence:** Xiaomei Li, <sup>1</sup>School of Nursing, Health Science Center, Xi'an  
49  
50 Jiaotong University, 76 Yanta West Road, Xi'an, 710061, Shaanxi, P. R. China,  
51  
52 roselee8825@163.com, (86) 29 8265-7017 (Office), (86) 29 8265-7015 (Fax).  
53  
54

55  
56 **Word Count:** 3536 words  
57

58  
59 **Keywords:** hypertension, self-management, community care, sex, gender  
60

## ABSTRACT

**Objectives** This study explored the relationship between self-management and blood pressure control in China.

**Design** A cross-sectional study.

**Setting** Eight community health centers from four cities in the northeast (Shenyang), northwest (Xi'an), southwest (Chengdu), and south (Changsha) of China.

**Participants** A total of 873 adults with hypertension, including 360 men and 513 women. Hypertension was defined as systolic blood pressure (SBP)  $\geq$  140 mmHg and/ or diastolic blood pressure (DBP)  $\geq$  90 mmHg.

**Outcome measurements** Blood pressure control was the primary outcome variable.

This was categorized as good control if individuals with hypertension reduced their blood pressure to  $<$  140/90 mmHg, otherwise it was categorized as poor control.

Secondary outcomes included self-management, defined as: 1) context, or condition specific factors or physical/social environments (e.g., age, sex, marital status, education, personal income, and health insurance), and 2) process, or knowledge/beliefs, self-regulation skills/abilities and social facilitation (e.g., treatment, diet, exercise and risk factor management). Data were analyzed using logistic regression models using SPSSv20.

**Results** A total of 67% (n=586) of participants had poor blood pressure control.

Limited outpatient care benefits in mainly rural residents (OR=2.26, 95% CI: 1.06-4.81) and longer disease duration (OR=1.03, 95% CI: 1.01-1.04) were associated with poor blood pressure control. Self-management practices reduced the odds of

1  
2  
3  
4 having poor BP control (OR=0.98, 95% CI: 0.97-0.99).  
5

6 **Conclusions** The individual and family self-management theory can serve as an  
7  
8  
9 effective theory for understanding the key contexts, processes, and outcomes essential  
10  
11 for blood pressure control in China. Future research should evaluate the effect of a  
12  
13 self-management intervention (e.g., self-monitoring, medication adherence, regular  
14  
15 and routine doctor visits, and social supports) for blood pressure control in China  
16  
17 using a multisite cluster randomized controlled trial. Sex and gender difference, cost  
18  
19 and patient-reported outcomes should also be examined.  
20  
21  
22  
23

#### 24 **Strengths and Limitations of this study**

- 25  
26  
27 • A strength is the use of the individual and family self-management theory  
28  
29 (IFSMT) to guide the study.  
30  
31
- 32  
33 • A strength is incorporation of a sex-based analysis.  
34
- 35  
36 • A strength is an attempt to use a surrogate marker of gender in the interpretation  
37  
38 of results (level of education, personal income and employment status).  
39
- 40  
41 • A limitation is the use of the Self-management Scale for Patients with  
42  
43 Hypertension. It has not been widely used and requires further psychometric  
44  
45 testing.  
46  
47
- 48  
49 • As this is a cross-sectional study, results are limited by self-reported survey  
50  
51 questions. Additionally, there could be other unobserved confounding factors we  
52  
53 have neither considered nor controlled.  
54  
55  
56  
57  
58  
59  
60

## BACKGROUND

The prevalence of hypertension has increased worldwide.<sup>1</sup> It is the most significant risk factor of cardiovascular disease (CVD), accounting for nearly half of the cardiovascular morbidity and mortality in the world.<sup>2-5</sup> In China, hypertension is a serious public health problem; it has increased almost 400% from 1980 to 2015 (from an estimated 59 million to 244.5 million)<sup>6-8</sup> and has accounted for over 2 million deaths or 24.6% of all-cause mortality.<sup>9</sup> Hypertensive complications in China are similar to other countries, which includes stroke, myocardial infarction, heart failure and chronic kidney disease.<sup>10</sup> Stroke is the leading cause of death and disability in China with an annual mortality of 1.6 million;<sup>11</sup> hypertension is the most important risk factor for stroke with the highest attributable risk at 34.6%.<sup>11</sup> Annual stroke healthcare expenditures are approximately ¥40 billion (US\$6.4 billion), causing a huge burden to the Chinese economy.<sup>11</sup> Domestic and international research studies have proved that adequate control of blood pressure reduces stroke,<sup>12</sup> CVD<sup>13</sup> and burden of disease,<sup>14 15</sup> and significantly improves health-related quality of life (HRQOL).<sup>16 17</sup>

The Chinese government launched the Chinese Basic Public Health Service Program in 2009; this provides a package of care that includes hypertension and diabetes screening and management in various community health care facilities. In 2013, the 17-country Prospective Urban Rural Epidemiology (PURE) study reported hypertension awareness of 46.5%, treatment of 87.5%, and control of 32.5%.<sup>2</sup> In 2017, the China Patient-Centered Evaluative Assessment of Cardiac Events (PEACE) study

1  
2  
3  
4 of 1.7 million individuals with hypertension suggested the prevalence of hypertension  
5  
6 in China was 37.2%, with an awareness of 36%, treatment of 22.9%, and control of  
7  
8 only 5.7%.<sup>8</sup> These results suggest current governmental packages of care are  
9  
10 insufficient to address the burden of hypertension in China.<sup>18</sup>  
11  
12  
13

14 Successful self-management strategies for individuals can result in effective  
15  
16 control of blood pressure.<sup>19 20</sup> Many studies of hypertension self-management have  
17  
18 improved blood pressure outcomes in the Western societies,<sup>15 21 22</sup> however, the  
19  
20 evidence for hypertension self-management is absent in the Chinese population. A  
21  
22 recent systematic review identified only two quasi-experimental studies focusing on  
23  
24 hypertension self-management in a population of American Chinese;<sup>23</sup> much of the  
25  
26 evidence was derived from a single urban site so is not representative of individuals  
27  
28 living in community settings.<sup>24 25</sup>  
29  
30  
31  
32  
33  
34

35 The individual and family self-management theory (IFSMT) suggests a dynamic  
36  
37 model of self-management consisting of: 1) condition specific factors and  
38  
39 physical/social environments (context), 2) knowledge and beliefs, self-regulation  
40  
41 skills and abilities, and social facilitation (process), and 3) cost, health status, and  
42  
43 HRQOL (outcomes).<sup>26</sup> Self-regulation includes the processes used to change behavior,  
44  
45 such as setting goals, self-monitoring, reflective thinking, planning/participating in  
46  
47 specific behaviors, management of responses, and self-evaluation.<sup>26</sup> Approaches to  
48  
49 managing hypertension using the IFSMT within the Chronic Care Model<sup>27 28</sup> suggests  
50  
51 individuals utilize self-regulation skills and abilities<sup>19 29 30</sup> and work in partnership  
52  
53 with healthcare providers to improve outcomes.<sup>31</sup>  
54  
55  
56  
57  
58  
59  
60

1  
2  
3  
4 Sex and gender differences have been gaining attention in the development and  
5  
6 management of hypertension.<sup>32-34</sup> Women are twice as likely to have uncontrolled  
7  
8 blood pressure after menopause,<sup>32</sup> have a higher prevalence of obesity,<sup>35</sup> and are less  
9  
10 likely to engage in physical activities<sup>36</sup> compared to men. Although the treatment  
11  
12 benefit of antihypertensive agents may not differ between men and women,<sup>37</sup> women  
13  
14 with hypertension are less likely to achieve recommended blood pressure targets,<sup>38 39</sup>  
15  
16 even with significantly higher use of antihypertensive medications.<sup>39</sup> Sex and gender  
17  
18 are distinct concepts often used interchangeably in the literature, both are important to  
19  
20 hypertension prevalence, awareness and management.<sup>22 35 40</sup> Sex represents the  
21  
22 biological characteristics of being male or female and gender represents the social  
23  
24 norms and expectations ascribed to men and women.<sup>41 42</sup> Gender differences in  
25  
26 women's self-management practices are affected by broader social, environmental,  
27  
28 and community factors described as gender roles, gender identity, gender  
29  
30 relationships and institutionalized gender.<sup>43</sup>  
31  
32  
33  
34  
35  
36  
37  
38  
39

40 The aim of this study is to describe context and process variables within the  
41  
42 IFSMT that impact blood pressure control (outcomes) in men and women in China.  
43  
44 This includes exploring both sex and gender aspects to self-management and blood  
45  
46 pressure control in Chinese adults living in the community.  
47  
48  
49  
50  
51  
52

## 53 **METHODS**

54  
55  
56 **Study design and settings.** Using a cross-sectional study design, individuals  
57  
58 with hypertension were recruited from eight community health care centers in the  
59  
60

1  
2  
3  
4 northeast (Shenyang City), northwest (Xi'an City), southwest (Chengdu City), and  
5  
6 south (Changsha City) of China from April 2015 to January 2016. Four geographic  
7  
8 areas were chosen in an attempt to recruit a representative sample of individuals with  
9  
10 hypertension in China.  
11  
12

13  
14 **Participants.** Recruitment was conducted in four steps. First, forty national  
15  
16 model community health centers accredited between 2011 and 2013 were purposely  
17  
18 selected from the four cities in China.<sup>44-46</sup> These centers provide national standardized  
19  
20 medical care to more than 100,000 individuals within a district in each of the four  
21  
22 cities. Second, two community health care centers were randomly selected in each  
23  
24 city from the forty national model community centers using a random number table  
25  
26 for study participation. Third, 1048 individuals (131 from each community health  
27  
28 center) who had been screened and diagnosed with hypertension within the past six  
29  
30 months were randomly recruited from electronic health care information systems.  
31  
32 Fourth, individuals were contacted to determine their interest in participating in a  
33  
34 telephone interview to learn more about the study.  
35  
36  
37  
38  
39  
40  
41  
42

43 Individuals who met the following inclusion criteria were recruited to participate:  
44  
45 age  $\geq$  18 years, SBP  $\geq$  140 mmHg and/or DBP  $\geq$  90 mmHg or prescribed  
46  
47 antihypertensive medication for at least six months and able to identify their  
48  
49 hypertensive medications within their medication schedule, able to read and write the  
50  
51 Chinese language, and able to provide written informed consent to participate in the  
52  
53 study. Individuals were excluded if they were pregnant, had cancer, or were identified  
54  
55 as being cognitively impaired in the health record ( $<$  recommended cut-off score of 26  
56  
57  
58  
59  
60



1  
2  
3  
4 using the Montreal Cognitive Assessment [MoCA] Chinese version-Beijing  
5  
6 version).<sup>47</sup>  
7

8  
9 The study was approved by the Ethics Committee of Xi'an Jiaotong University  
10 Health Science Center. Trained research assistants who followed standard operating  
11  
12 procedures explained the purpose and confidentiality of the study to participants and  
13  
14 informed consent was obtained prior to survey completion.  
15  
16  
17

18  
19 **Patient and public involvement.** Patients and the public were not involved in  
20  
21 the design of this study.  
22  
23

24  
25 **Measurement.** The IFSMT guided data collection and measurement.<sup>26</sup>  
26

27  
28 **Context.** Demographic (age, sex, marital status, education, personal income, and  
29  
30 health insurance) data were collected by interview using investigator-developed  
31  
32 questionnaires. Marital status was divided into two categories: married or  
33  
34 single/divorced/widowed. Education was categorized as primary school or no formal  
35  
36 education (< 6 years of schooling), high school (6-12 years of schooling), or college  
37  
38 or higher (> 12 years of schooling). Personal income was divided into two categories:  
39  
40  $\leq$  ¥1500 (US\$225) or  $>$  ¥1500 (US\$225) based on Chinese individual income tax  
41  
42 rates.<sup>48</sup> Health insurance was divided into four categories: Urban Employees' Medical  
43  
44 Insurance (UEMI), Urban Residents' Medical Insurance (URMI), New Rural  
45  
46 Cooperative Medical Scheme (NCMS), and uninsured.  
47  
48  
49  
50  
51

52  
53 Risk behaviors included smoking (smoker [current smokers who smoked more  
54  
55 than one cigarette daily]) or non-smoker [smoked fewer than 6 months or never  
56  
57 smoked]) and alcohol consumption (consumer or non-consumer [consumed less than  
58  
59  
60

1  
2  
3  
4 1 glass per month or never drank]). Family history of hypertension was defined as a  
5  
6 blood relative such as mother, father, sister, or brother with diagnosed hypertension  
7  
8 (SBP  $\geq$  140 or DBP  $\geq$  90). Anthropometric measures included weight and height  
9  
10 (body mass index [BMI]) and waist circumference [WC]). Body mass index was  
11  
12 calculated as weight in kilograms divided by height in meters squared and classified  
13  
14 into four levels according to the guidelines for prevention and control of overweight  
15  
16 and obesity in Chinese adults: underweight ( $<$  18.5 kg/m<sup>2</sup>), normal (18.5-23.9 kg/m<sup>2</sup>),  
17  
18 overweight (24.0-27.9 kg/m<sup>2</sup>), and obese: ( $\geq$ 28 kg/m<sup>2</sup>).<sup>49-51</sup> Waist circumference (WC)  
19  
20 was divided into two categories: obese (men  $\geq$  90cm, women  $\geq$  80) and normal  
21  
22 (men  $<$  90cm, women  $<$  80cm) according to the International Diabetes Federation<sup>52</sup>  
23  
24 and National Institute for Health and Care Excellence.<sup>53</sup> Comorbidities were  
25  
26 self-reported and based on a physician's diagnosis.  
27  
28  
29  
30  
31  
32  
33  
34

35 **Process.** The self-management scale for individuals with hypertension<sup>54</sup> used in  
36  
37 this study was developed by the China Medical Foundation (CMB) community  
38  
39 chronic disease management research group. Split-half reliability of the scale was  
40  
41 0.976 and Cronbach's alpha ranged from 0.853 to 0.868 on each of the 5 sub-scales.  
42  
43 The five subscales contained 21 Likert scale items addressing: treatment management,  
44  
45 diet management, physical exercise management, lifestyle management, and risk  
46  
47 factor management. Subscale scores ranged from 1 to 5 and total scores ranged from  
48  
49 21 to 105, with higher scores indicating higher self-management behaviors  
50  
51 (Supplementary File). In this this study, original subscale scores were converted to  
52  
53 standard scores for comparisons.  
54  
55  
56  
57  
58  
59  
60

1  
2  
3  
4 **Outcomes. Blood Pressure.** Blood pressure control was defined as a good if  
5  
6 individuals had a SBP < 140 mmHg and DBP < 90 mmHg. Blood pressures were  
7  
8 taken by trained nurses using a mercury sphygmomanometer according to the  
9  
10 criterion formulated by the Chinese Hypertension League/National Center for  
11  
12 Cardiovascular Disease (CHL/NCCD).<sup>55</sup> Two BP readings for each participant were  
13  
14 obtained at 2-minute intervals in a sitting position and then averaged for analysis.  
15  
16  
17

18  
19 **Bias.** This study is cross-sectional and results may be subject to a non-response  
20  
21 bias.<sup>56</sup> However, recruiting a large number of individuals with hypertension across  
22  
23 four areas of China attempted to minimize this bias. As this is an observational study,  
24  
25 results are limited by self-reported survey questions. Additionally, there could be  
26  
27 other unobserved confounding factors we have neither considered nor controlled.  
28  
29  
30

31  
32 **Sample size.** The sample size was based on 15 to 30 subjects per predictor in the  
33  
34 logistic regression model.<sup>57</sup> Given there were 22 predictors, the final sample size was  
35  
36 estimated at 660. The final sample size was increased to a total of 792 participants to  
37  
38 account for a 20% attrition (n=106 participants from each community health care  
39  
40 center).  
41  
42  
43  
44

45  
46 **Data analysis.** All data were analyzed using SPSSv20. Univariate statistics  
47  
48 (frequencies, percentages, and means) were used to describe the contextual factors of  
49  
50 the sample. Bivariate associations between context and process variables were  
51  
52 assessed using  $X^2$  and t-tests, or Mann-Whitney U tests for non-normally distributed  
53  
54 outcome variables.  
55  
56  
57

58  
59 Based on the IFSMT theory, a multivariable logistic regression model was used  
60

1  
2  
3  
4 to examine the association between context (individual/family, condition specific),  
5  
6 process (blood pressure self-regulation skills & abilities [treatment management, diet  
7  
8 management, physical exercise management, lifestyle management, risk factor  
9  
10 management], community health centers (CHC) visits, hospitals visits and outcomes  
11  
12 (blood pressure control). Preliminary steps included assessing for multicollinearity  
13  
14 using the variance inflation factor (VIF). A hierarchical approach was used to build  
15  
16 our final model,<sup>56</sup> starting with Model 1 , then cumulatively adding clusters (Models 2  
17  
18 and 3) of variables.  
19  
20  
21  
22  
23

24  
25 In model 1, the non-modifiable context variables related to the individual/family  
26  
27 (age, sex, marital status, education, employment, personal incomes, and health  
28  
29 insurance) were explored. In model 2, modifiable variables that were condition  
30  
31 specific (BMI, WC, disease duration, comorbidities, family history, smoking and  
32  
33 alcohol consumption) were added to Model 1. In model 3, processes variables related  
34  
35 to self-regulation skills and abilities (treatment management, diet management,  
36  
37 physical exercise management, lifestyle management, risk factors management, CHC  
38  
39 visits, and hospitals visits) were added to Model 2. Nested models were compared  
40  
41 using the likelihood ratio test (LRT). Clusters were kept in the model if they  
42  
43 significantly contributed to model fit based on the LRT. A two-sided p-value of  $p <$   
44  
45  
46  
47  
48  
49  
50  
51 0.05 was used to establish statistical significance.  
52  
53  
54  
55

## 56 RESULTS

57  
58 Twenty-nine individuals refused to participate in the interview. Of those who  
59  
60

1  
2  
3  
4 participated, 114 individuals were excluded due to cognitive impairment (n= 90),  
5  
6 pregnancy (n=11), and cancer (n=13). Of 905 eligible participants, 32 were excluded  
7  
8 because of missing or implausible (more than 50% of the responses) data (Figure 1).  
9  
10 A total final sample of 873 individuals with hypertension (360 males, 513 females)  
11  
12 consented to participate in the study.  
13  
14

15  
16  
17 - Insert Figure 1 -  
18

19 **Context.** Demographic characteristics of participants are presented in Table 1.

20  
21 The mean age of participants was 65 years. Most of the sample were female (n=513,  
22  
23 58.8%), married (n=757, 86.7%) and retired (n=596, 68.3%). The majority of  
24  
25 participants had health insurance (n=839, 96.1%), 10 years disease duration, and poor  
26  
27 blood pressure control (n= 586, 67.1%). Most had an abnormal BMI (underweight,  
28  
29 overweight and obese) (n=569, 65.1%) and WC (n= 644, 73.8%). Compared to men,  
30  
31 more women were single/divorced/widowed, less likely to have graduated from  
32  
33 college, were unemployed, and had a lower personal income. Women were also more  
34  
35 likely to be non-smokers and non-drinkers but had more co-morbidities compared to  
36  
37 men.  
38  
39  
40  
41  
42  
43  
44

45 - Insert Table 1 -  
46  
47

48 **Process.** Self-management process variables are reported in Table 2. The lowest  
49  
50 scores in self-management skills and abilities were in treatment management (e.g.,  
51  
52 medication adherence, routine and regular doctors' visits, self-monitoring blood  
53  
54 pressure), physical exercise management, lifestyle management, and diet management.  
55  
56 Scores of risk factor management were highest. Compared to men, women were more  
57  
58  
59  
60

1  
2  
3  
4 likely to have higher total scores for self-management skills/abilities, diet  
5  
6 management and risk factor management. Women also had more hospital visits  
7  
8 compared to men.  
9

10  
11 - Insert Table 2 -  
12  
13

14 **Outcomes.** Results of the logistic regressions analyses are depicted in Table 3.  
15  
16 All models had good fit based on the Hosmer-Lemeshow test. In Model 1, personal  
17 income, and health insurance were significant for BP control. Participants with NCMS  
18 (medical scheme mainly for rural residents) compared to UEMI (medical insurance  
19 mainly for urban employees) increased the odds of poor blood pressure control (OR=  
20 2.70, 95% CI: 1.28-5.67). When BMI, WC, smoking, drinking, family history, disease  
21 duration and comorbidities were added into Model 2, there was a slightly lower odds  
22 of NCMS compared with UEMI affecting poor BP control (OR= 2.69, 95% CI:  
23 1.27-5.69). A higher odds of having poor BP control was also observed with a longer  
24 duration of disease (OR=1.03, 95% CI: 1.01-1.04). A similar pattern was observed  
25 when treatment management, diet management, physical exercise management,  
26 lifestyle management, risk factor management, CHC visits, and hospital visits were  
27 added to Model 3. Self-management treatments reduced the odds of poor BP control  
28 in the final model (OR= 0.98, 95% CI: 0.97-0.99).  
29  
30  
31  
32  
33  
34  
35  
36  
37  
38  
39  
40  
41  
42  
43  
44  
45  
46  
47  
48  
49

50 - Insert Table 3 -  
51  
52  
53  
54

## 55 **DISCUSSION**

56  
57  
58 **Context of self-management and blood pressure control.** The results of this  
59  
60

1  
2  
3  
4 study provide insights into the contextual self-management factors that impact blood  
5  
6 pressure control in China. A total of 67% of individuals with hypertension living in  
7  
8 the community did not achieve recommended blood pressure targets. Results are  
9  
10 consistent with previous studies that suggest poor blood pressure control is linked to a  
11  
12 lower socioeconomic status.<sup>58 59-61</sup> Individuals with UEMI health insurance and  
13  
14 benefit packages that covered outpatient services had better blood pressure control  
15  
16 than those individuals enrolled with NCMS (extremely limited outpatient care  
17  
18 benefits for rural residents).<sup>62-64</sup> Inadequate insurance and poor blood pressure control  
19  
20 is also supported by a US national Health and Nutrition Examination Survey  
21  
22 (NHANES).<sup>65</sup>

23  
24  
25  
26  
27  
28  
29  
30 Results from this study also suggests longer disease duration increases the odds  
31  
32 of having poor blood pressure control. This is consistent with a cross-sectional study  
33  
34 in Hong Kong that suggested advanced age and longer duration of antihypertensive  
35  
36 medication use was independently associated with poor blood pressure control.<sup>66</sup> The  
37  
38 longer duration of hypertension may indicate poor adherence to self-management  
39  
40 practices. However, others reported good adherence and better blood pressure control  
41  
42 in elderly individuals (age  $\geq$  65 years) with hypertension and a longer duration of  
43  
44 antihypertensive medicine use.<sup>67 68</sup> In general, blood pressure may be more difficult to  
45  
46 control with increasing age. A cross-sectional study of outpatients in the United States  
47  
48 reported that concomitant use of more than one antihypertensive medication increases  
49  
50 with patient age (up to age 80 years, after which it then decreases); this may have an  
51  
52 impact on the patient's willingness or ability to comply with the overall treatment  
53  
54  
55  
56  
57  
58  
59  
60

1  
2  
3  
4 regimes.<sup>69</sup> More than half of the participants in this study had more than one  
5  
6 comorbidity, which may have influenced participants' medication adherence.  
7  
8

9  
10 Women in this study were significantly older and more likely to have more than  
11  
12 one comorbidity (e.g., arthritis and back and neck problems) compared to men. In  
13  
14 addition to age, biological sex influences the development of comorbidities,<sup>70 71</sup> such  
15  
16 as hypertension after menopause.<sup>35</sup> Comorbidities among women aged 60 to 79 years  
17  
18 with hypertension have been previously reported;<sup>70 71</sup> they increase the complexities  
19  
20 of care for women,<sup>72</sup> and have been associated with poor self-care ability.<sup>72</sup> Low  
21  
22 income has not only been a predictor resulting in low adherence to medication  
23  
24 regimes,<sup>73</sup> it has also been a factor associated with the development of comorbid  
25  
26 disease.<sup>74</sup> More women in this study also lived alone with fewer supports compared to  
27  
28 men. These findings may explain the more frequent unscheduled physician and CHC  
29  
30 visits in women and provide important information for developing effective  
31  
32 self-management interventions to improve blood pressure control in China.  
33  
34  
35  
36  
37  
38  
39

40  
41 Individuals in this study with lower personal incomes were women; women who  
42  
43 were older, lived alone, had lower education, and were more likely to be unemployed.  
44  
45 Level of education, hours of work, occupation and responsibility in caring for children  
46  
47 has been conceptualized by others as gender-related.<sup>75</sup> Lower educated women  
48  
49 compared with higher educated women and non-working women compared  
50  
51 non-working men have been associated with poor blood pressure control;<sup>76 77</sup> others  
52  
53 report traditional sex differences in cardiovascular disease risk factors are explained  
54  
55 by feminine personality traits. (i.e., gender).<sup>41</sup> Neither sex nor gender affected blood  
56  
57  
58  
59  
60



1  
2  
3  
4 pressure control in this study, but it may be because we did not have a robust measure  
5  
6 of gender. Gender has generally been defined across four dimensions including  
7  
8 gender roles, gender identity, gender relationships and institutionalized gender.<sup>43</sup> The  
9  
10 important role gender may play in blood pressure control requires further  
11  
12 investigation, especially in a culture where boys are encouraged to pursue higher  
13  
14 education and girls encouraged to work in the family home.  
15  
16  
17  
18

19 **Process of self-management and blood pressure control.** This study is one of  
20  
21 few to compare hypertensive self-management skills in treatment, diet, physical  
22  
23 exercise, lifestyle, and risk factors in China. Poor blood pressure control was  
24  
25 significantly associated with low self-management skills, especially in treatment  
26  
27 management (e.g., medication adherence, regularly scheduled doctors' visits, and  
28  
29 self-monitoring of blood pressure). This is supported by the IFSMT theory, which  
30  
31 purports successful blood pressure control at the individual level is related to an  
32  
33 individual's self-management skills and their involvement in the treatment and control  
34  
35 of their condition.<sup>78</sup> A lifelong adherence to prescribed anti-hypertensive medications,  
36  
37 regular clinic visits, and self-monitoring skills have assisted other individuals to  
38  
39 control their blood pressure.<sup>79 80</sup> Non-adherence to treatment management is related to  
40  
41 a higher risk of cardiovascular morbidity and mortality.<sup>81 82</sup> Hypertension is an  
42  
43 asymptomatic disease, most individuals with hypertension do not experience  
44  
45 symptoms and may not feel it necessary to adhere to prescribed or suggested  
46  
47 treatment regimes.<sup>83</sup> Moreover, medication side effects may also deter individuals  
48  
49 from adhering to prescribed or suggested treatment regimes, especially in the elderly  
50  
51  
52  
53  
54  
55  
56  
57  
58  
59  
60

1  
2  
3  
4 Chinese.<sup>84</sup> The perceived benefits of Chinese herbs may be more important than  
5  
6 western antihypertensive medications for elderly Chinese who tend to be less adherent  
7  
8 with western antihypertensive medications and believe Chinese herbs have fewer side  
9  
10 effects.<sup>85</sup> Integrating traditional practices into hypertension management regimes with  
11  
12 frequent and careful monitoring of side effects of and adjustment of medications may  
13  
14 be warranted. Effectiveness and adherence to antihypertensive medication regimes  
15  
16 depends on regularly scheduled visits to community health centers.<sup>25</sup> Regular blood  
17  
18 pressure monitoring also reduces hypertension,<sup>86 87</sup> suggesting home blood pressure  
19  
20 monitoring should have a primary role in long-term blood pressure control in China.  
21  
22 The results of this study also show that women are more likely to have better skills in  
23  
24 diet and risk factor management. The findings are consistent with those of Choi<sup>88</sup> and  
25  
26 Zhou<sup>89</sup> who report that women with hypertension have higher diet management skills,  
27  
28 especially related to the daily consumption of fresh vegetables and fruits, which are  
29  
30 thought to be protective factors associated with better blood pressure control.<sup>89</sup>  
31  
32 Diet and risk factor management were not significantly associated with blood pressure  
33  
34 control in this study and this may be because diet management (e.g., balanced diet and  
35  
36 salt/sodium control) is difficult for participants to conceptualize. This requires  
37  
38 exploration in a future study.  
39  
40  
41  
42  
43  
44  
45  
46  
47  
48  
49

50  
51 Limitations. There are several limitations to the study. First, this study is  
52  
53 cross-sectional and results may be subject to a non-response bias.<sup>56</sup> There could be  
54  
55 other unobserved confounding factors we have neither considered nor controlled.  
56  
57  
58 However, recruiting a large number of individuals with hypertension across four areas  
59  
60

1  
2  
3  
4 of China attempted to minimize this bias. Second, many of the context and process  
5  
6 variables were self-reported, increasing the potential for a response bias. Third, the  
7  
8 scale of self-management for patients with hypertension scale has not been widely  
9  
10 used and need further psychometric testing. Lastly, a more robust measure of gender  
11  
12 needs to be incorporated into future research. The strengths of the study include use of  
13  
14 the individual and family self-management theory and the incorporation of sex and  
15  
16 gender-based lens to guide the data analyses and interpretation.  
17  
18  
19  
20  
21  
22  
23  
24

## 25 **CONCLUSION**

26  
27 This is one of few studies using IFSMT theory to assess how context and process  
28  
29 variables influence self-management and blood pressure in individuals with  
30  
31 hypertension. Context variables related to longer disease duration, lower income, and  
32  
33 NCMS health insurance (inadequate outpatient care benefits for rural residents) were  
34  
35 associated with poor control of hypertension in China. Lower cost sharing of  
36  
37 outpatient care, increasing access to preventive care, and improving accessibility to  
38  
39 medications and self-management strategies for NCMS enrollees should be  
40  
41 considered by Chinese health care policy makers. Moreover, sex and gender-related  
42  
43 factors, including strategies to improve self-management skills and provide social  
44  
45 supports need to be investigated in future randomized controlled trials.  
46  
47  
48  
49  
50  
51  
52  
53  
54  
55  
56  
57  
58  
59  
60

1  
2  
3  
4 **Acknowledgements** We thank all participants involved in the research. We are  
5  
6 grateful to the nurses, doctors and health care providers in the community health  
7  
8 centers for their efforts in coordination of the fieldwork. We thank Ying Zhang, RN,  
9  
10 Yue Ma, RN and Yiping Nan, RN for their assistance with data collection.  
11  
12

13  
14 **Contributors** XML was a major contributor in project administration, research design,  
15  
16 organizing the fieldwork, giving advice on the manuscript writing, and supervision.  
17  
18 ZQ and MP were major contributors in data analysis, manuscript writing and revision.  
19  
20 ZQ, FL, XLW and JQL were involved in community nursing training in blood  
21  
22 pressure measurement, providing patient-centered questionnaire instructions,  
23  
24 collecting data, and inputting results into the database. ZQ, MP, YNZ and DLW  
25  
26 analyzed and interpreted all patient data. All authors have read and approved the final  
27  
28 manuscript.  
29  
30  
31  
32  
33

34  
35 **Funding** This work was supported by China Medical Board, Grant Number (11-085).  
36

37  
38 **Competing interests** None declared.  
39

40  
41 **Ethics approval** This study was approved by the Ethics Committee of Xi'an Jiaotong  
42  
43 University Health Science Center (Approval No. 2014-008).  
44

45  
46 **Provenance and peer review** Not commissioned; externally peer reviewed.  
47

48  
49 **Data sharing statement** No additional data are available.  
50  
51  
52  
53  
54  
55  
56  
57  
58  
59  
60

**REFERENCES**

1. NCD Risk Factor Collaboration (NCD-RisC). Worldwide trends in blood pressure from 1975 to 2015: a pooled analysis of 1479 population-based measurement studies with 19·1 million participants. *The Lancet* 2017;389(10064):37-55. doi: [https://doi.org/10.1016/S0140-6736\(16\)31919-5](https://doi.org/10.1016/S0140-6736(16)31919-5)
2. Chow CK, Teo KK, Rangarajan S, et al. Prevalence, awareness, treatment, and control of hypertension in rural and urban communities in high-, middle-, and low-income countries. *Jama* 2013;310(9):959-68. doi: 10.1001/jama.2013.184182
3. Roger VL, Go AS, Lloyd-Jones DM, et al. Executive summary: heart disease and stroke statistics--2012 update: a report from the American Heart Association. *Circulation* 2012;125(1):188-97. doi: 10.1161/CIR.0b013e3182456d46
4. Liu L. Cardiovascular diseases in China. *Biochemistry and cell biology = Biochimie et biologie cellulaire* 2007;85(2):157-63. doi: 10.1139/o07-004 [published Online First: 2007/05/31]
5. He J, Gu D, Wu X, et al. Major causes of death among men and women in China. *The New England journal of medicine* 2005;353(11):1124-34. doi: 10.1056/NEJMsa050467 [published Online First: 2005/09/16]
6. Reynolds K, Gu D, Muntner P, et al. Geographic variations in the prevalence, awareness, treatment and control of hypertension in China. *Journal of hypertension* 2003;21(7):1273-81. doi: 10.1097/01.hjh.0000059043.65882.15
7. Wang Z, Chen Z, Zhang L, et al. Status of Hypertension in China: Results from the China Hypertension Survey, 2012-2015. *Circulation* 2018 doi: 10.1161/circulationaha.117.032380

- 1  
2  
3  
4 8. Lu J, Lu Y, Wang X, et al. Prevalence, awareness, treatment, and control of  
5  
6 hypertension in China: data from 1.7 million adults in a population-based screening  
7  
8 study (China PEACE Million Persons Project). *Lancet (London, England)*  
9  
10 2017;390(10112):2549-58. doi: 10.1016/s0140-6736(17)32478-9 [published Online  
11  
12 First: 2017/11/06]  
13  
14  
15  
16  
17 9. Yang G, Wang Y, Zeng Y, et al. Rapid health transition in China, 1990–2010:  
18  
19 findings from the Global Burden of Disease Study 2010. *The Lancet*  
20  
21 2013;381(9882):1987-2015. doi: 10.1016/s0140-6736(13)61097-1  
22  
23  
24  
25 10. Liu LS, & Writing Group of 2010 Chinese Guidelines for the Management of  
26  
27 Hypertension. 2010 Chinese guidelines for the management of hypertension.  
28  
29 *American journal of hypertension* 2012;25(2):271-71. doi: 10.1038/ajh.2011.248  
30  
31  
32  
33 11. Liu L, Wang D, Wong KS, et al. Stroke and stroke care in China: huge burden,  
34  
35 significant workload, and a national priority. *Stroke* 2011;42(12):3651-4. doi:  
36  
37 10.1161/strokeaha.111.635755 [published Online First: 2011/11/05]  
38  
39  
40  
41 12. Blood pressure, cholesterol, and stroke in eastern Asia. Eastern Stroke and  
42  
43 Coronary Heart Disease Collaborative Research Group. *Lancet (London, England)*  
44  
45 1998;352(9143):1801-7. [published Online First: 1998/12/16]  
46  
47  
48  
49 13. Collins R, Peto R, MacMahon S, et al. Blood pressure, stroke, and coronary heart  
50  
51 disease. Part 2, Short-term reductions in blood pressure: overview of randomised drug  
52  
53 trials in their epidemiological context. *Lancet (London, England)*  
54  
55 1990;335(8693):827-38. [published Online First: 1990/04/07]  
56  
57  
58  
59 14. Moran AE, Odden MC, Thanataveerat A, et al. Cost-effectiveness of hypertension  
60

- 1  
2  
3  
4 therapy according to 2014 guidelines. *The New England journal of medicine*  
5  
6 2015;372(5):447-55. doi: 10.1056/NEJMsa1406751  
7  
8  
9 15. Penaloza-Ramos MC, Jowett S, Mant J, et al. Cost-effectiveness of  
10  
11 self-management of blood pressure in hypertensive patients over 70 years with  
12  
13 suboptimal control and established cardiovascular disease or additional cardiovascular  
14  
15 risk diseases (TASMIN-SR). *European journal of preventive cardiology*  
16  
17 2016;23(9):902-12. doi: 10.1177/2047487315618784 [published Online First:  
18  
19 2015/11/26]  
20  
21  
22  
23  
24 16. Tsai JC, Yang HY, Wang WH, et al. The Beneficial Effect of Regular Endurance  
25  
26 Exercise Training on Blood Pressure and Quality of Life in Patients with  
27  
28 Hypertension. *Clinical and Experimental Hypertension* 2004;26(3):255-65. doi:  
29  
30 10.1081/ceh-120030234  
31  
32  
33  
34 17. Wolff M, Sundquist K, Larsson Lonn S, et al. Impact of yoga on blood pressure  
35  
36 and quality of life in patients with hypertension - a controlled trial in primary care,  
37  
38 matched for systolic blood pressure. *BMC cardiovascular disorders* 2013;13:111. doi:  
39  
40 10.1186/1471-2261-13-111 [published Online First: 2013/12/10]  
41  
42  
43  
44 18. Hesketh T, Zhou X. Hypertension in China: the gap between policy and practice.  
45  
46 *The Lancet* 2017;390(10112):2529-30. doi: 10.1016/s0140-6736(17)32743-5  
47  
48  
49  
50 19. McManus RJ, Mant J, Haque MS, et al. Effect of self-monitoring and medication  
51  
52 self-titration on systolic blood pressure in hypertensive patients at high risk of  
53  
54 cardiovascular disease: the TASMIN-SR randomized clinical trial. *Jama*  
55  
56 2014;312(8):799-808. doi: 10.1001/jama.2014.10057  
57  
58  
59  
60

- 1  
2  
3  
4 20. Tucker KL, Sheppard JP, Stevens R, et al. Self-monitoring of blood pressure in  
5  
6 hypertension: A systematic review and individual patient data meta-analysis. *PLoS*  
7  
8 *medicine* 2017;14(9):e1002389. doi: 10.1371/journal.pmed.1002389  
9  
10  
11 21. Bosworth HB, Olsen MK, Grubber JM, et al. Two self-management interventions  
12  
13 to improve hypertension control: a randomized trial. *Ann Intern Med*  
14  
15 2009;151(10):687-95. doi: 10.7326/0003-4819-151-10-200911170-00148 [published  
16  
17 Online First: 2009/11/19]  
18  
19 22. Magid DJ, Farmer SA. Hypertension Self-Management. *Circulation:*  
20  
21 *Cardiovascular Quality and Outcomes* 2014;7(2):205-06. doi:  
22  
23 doi:10.1161/CIRCOUTCOMES.114.000885  
24  
25 23. Huang YC, Garcia AA. Culturally-tailored interventions for chronic disease  
26  
27 self-management among Chinese Americans: a systematic review. *Ethnicity & health*  
28  
29 2018;1-20. doi: 10.1080/13557858.2018.1432752  
30  
31 24. Fu D, Fu H, McGowan P, et al. Implementation and quantitative evaluation of  
32  
33 chronic disease self-management programme in Shanghai, China: randomized  
34  
35 controlled trial. *Bulletin of the World Health Organization* 2003;81(3):174-82.  
36  
37 [published Online First: 2003/05/24]  
38  
39 25. Gu J, Zhang XJ, Wang TH, et al. Hypertension knowledge, awareness, and  
40  
41 self-management behaviors affect hypertension control: a community-based study in  
42  
43 Xuhui District, Shanghai, China. *Cardiology* 2014;127(2):96-104.  
44  
45 26. Ryan P, Sawin KJ. The Individual and Family Self-Management Theory:  
46  
47 background and perspectives on context, process, and outcomes. *Nurs Outlook*  
48  
49  
50  
51  
52  
53  
54  
55  
56  
57  
58  
59  
60



- 2009;57(4):217-25 e6. doi: 10.1016/j.outlook.2008.10.004
27. Bodenheimer T, Lorig K, Holman H, et al. Patient self-management of chronic disease in primary care. *Jama* 2002;288(19):2469-75. doi: 10.1001/jama.288.19.2469
28. Bodenheimer T, Wagner EH, Grumbach K. Improving primary care for patients with chronic illness. *Jama* 2002;288(14):1775-9. [published Online First: 2002/10/09]
29. Halme L, Vesalainen R, Kaaja M, et al. Self-monitoring of blood pressure promotes achievement of blood pressure target in primary health care. *American journal of hypertension* 2005;18(11):1415-20. doi: 10.1016/j.amjhyper.2005.05.017
30. McManus RJ, Mant J, Roalfe A, et al. Targets and self monitoring in hypertension: randomised controlled trial and cost effectiveness analysis. *Bmj* 2005;331(7515):493. doi: 10.1136/bmj.38558.393669.E0
31. Grady PA, Gough LL. Self-management: a comprehensive approach to management of chronic conditions. *American journal of public health* 2014;104(8):e25-31. doi: 10.2105/ajph.2014.302041 [published Online First: 2014/06/13]
32. Abramson BL, Melvin RG. Cardiovascular risk in women: focus on hypertension. *The Canadian journal of cardiology* 2014;30(5):553-9. doi: 10.1016/j.cjca.2014.02.014 [published Online First: 2014/05/03]
33. Ong KL, Tso AW, Lam KS, et al. Gender difference in blood pressure control and cardiovascular risk factors in Americans with diagnosed hypertension. *Hypertension* 2008;51(4):1142-8. doi: 10.1161/hypertensionaha.107.105205 [published Online First: 2008/02/09]

- 1  
2  
3  
4 34. Gu Q, Burt VL, Paulose-Ram R, et al. Gender differences in hypertension  
5  
6 treatment, drug utilization patterns, and blood pressure control among US adults with  
7  
8 hypertension: data from the National Health and Nutrition Examination Survey  
9  
10 1999-2004. *American journal of hypertension* 2008;21(7):789-98. doi:  
11  
12 10.1038/ajh.2008.185 [published Online First: 2008/05/03]  
13  
14  
15  
16 35. Everett B, Zajacova A. Gender differences in hypertension and hypertension  
17  
18 awareness among young adults. *Biodemography and social biology* 2015;61(1):1-17.  
19  
20  
21 36. Haskell WL, Lee IM, Pate RR, et al. Physical activity and public health: updated  
22  
23 recommendation for adults from the American College of Sports Medicine and the  
24  
25 American Heart Association. *Circulation* 2007;116(9):1081.  
26  
27  
28  
29 37. Gueyffier F, Boutitie F, Boissel JP, et al. Effect of antihypertensive drug treatment  
30  
31 on cardiovascular outcomes in women and men: a meta-analysis of individual patient  
32  
33 data from randomized, controlled trials. *Annals of Internal Medicine*  
34  
35 1997;126(10):761-67.  
36  
37  
38  
39 38. Gahagan J, Gray K, Whynacht A. Sex and gender matter in health research:  
40  
41 addressing health inequities in health research reporting. *International journal for*  
42  
43 *equity in health* 2015;14 doi: 10.1186/s12939-015-0144-4  
44  
45  
46  
47 39. Gu Q, Burt VL, Paulose-Ram R, et al. Gender differences in hypertension  
48  
49 treatment, drug utilization patterns, and blood pressure control among US adults with  
50  
51 hypertension: data from the National Health and Nutrition Examination Survey  
52  
53 1999–2004. *American journal of hypertension* 2008;21(7):789-98.  
54  
55  
56  
57 40. Daugherty SL, Masoudi FA, Ellis JL, et al. Age-dependent gender differences in  
58  
59  
60

1  
2  
3  
4 hypertension management. *Journal of hypertension* 2011;29(5):1005-11. doi:

5  
6 10.1097/HJH.0b013e3283449512 [published Online First: 2011/02/19]  
7

8  
9 41. Pelletier R, Ditto B, Pilote L. A composite measure of gender and its association  
10 with risk factors in patients with premature acute coronary syndrome. *Psychosomatic*  
11 *medicine* 2015;77(5):517-26. doi: 10.1097/psy.000000000000186 [published Online  
12  
13  
14  
15  
16  
17 First: 2015/05/20]

18  
19 42. Johnson JL, Greaves L, Repta R. Better science with sex and gender: Facilitating  
20 the use of a sex and gender-based analysis in health research. *International journal for*  
21 *equity in health* 2009;8:14. doi: 10.1186/1475-9276-8-14  
22  
23  
24  
25

26  
27 43. How to integrate sex and gender into research. [Available from:

28  
29  
30 <http://www.cihr-irsc.gc.ca/e/50836.html> accessed 23 July 2018.  
31

32  
33 44. National Health and Family Planning Commission of the People's Republic of  
34 China. The Notice of Ministry of Health General Office of the Announcement of the  
35 List of National Model Community Health Care Centers in 2011, 2011.  
36  
37

38  
39  
40 <http://www.nhfpc.gov.cn/zwgkzt/wsbyjsj/201112/53666.shtml> (accessed 24 May,  
41  
42  
43 2018). (In Chinese)  
44

45  
46 45. National Health and Family Planning Commission of the People's Republic of  
47 China. The Notice of Ministry of Health General Office of the Announcement of the  
48 List of National Model Community Health Care Centers in 2012, 2012.  
49  
50

51  
52  
53 <http://www.nhfpc.gov.cn/zwgkzt/wsbyjsj/201211/56380.shtml> (accessed 24 May,  
54  
55  
56 2018). (In Chinese)  
57

58  
59 46. National Health Commission of the People's Republic of China. The Notice of the  
60

1  
2  
3  
4 General Office of the National Health and Family Planning Commission on the  
5  
6 Announcement of the List of National Model Community Health Care Centers in  
7  
8  
9 2013, 2013.

10  
11 <http://www.nhfpc.gov.cn/jws/s3581r/201310/efaefdd8d2d147fb8781d6bef5ecad53.shtml>  
12  
13  
14 ml (accessed 24 May, 2018). (In Chinese)

15  
16  
17 47. Yu J, Li J, Huang X. The Beijing version of the Montreal Cognitive Assessment  
18  
19 as a brief screening tool for mild cognitive impairment: a community-based study.

20  
21  
22 *BMC psychiatry* 2012;12:156. doi: 10.1186/1471-244x-12-156 [published Online  
23  
24 First: 2012/09/27]

25  
26  
27 48. The Central People's Government of the People's Republic of China. Decision of  
28  
29 the Standing Committee of the National People's Congress Regarding the  
30  
31 Amendment to the Individual Income Tax Law of the People's Republic of China,  
32  
33 2011. [http://www.gov.cn/flfg/2011-07/01/content\\_1897307.htm](http://www.gov.cn/flfg/2011-07/01/content_1897307.htm) (accessed 24 May  
34  
35 2018). (In Chinese)

36  
37  
38 49. Zhou BF, Cooperative Meta-Analysis Group of the Working Group on Obesity in  
39  
40 C. Predictive values of body mass index and waist circumference for risk factors of  
41  
42 certain related diseases in Chinese adults--study on optimal cut-off points of body  
43  
44 mass index and waist circumference in Chinese adults. *Biomedical and environmental*  
45  
46 *sciences : BES* 2002;15(1):83-96.

47  
48  
49 50. Zhou BF. Effect of body mass index on all-cause mortality and incidence of  
50  
51 cardiovascular diseases--report for meta-analysis of prospective studies open optimal  
52  
53 cut-off points of body mass index in Chinese adults. *Biomedical and environmental*  
54  
55  
56  
57  
58  
59  
60

1  
2  
3  
4 *sciences* : *BES* 2002;15(3):245-52. [published Online First: 2002/12/26]

5  
6  
7 51. Chen C, Lu FC. The guidelines for prevention and control of overweight and  
8  
9 obesity in Chinese adults. *Biomedical and environmental sciences* : *BES* 2004;17  
10  
11 Suppl:1-36. [published Online First: 2005/04/06]

12  
13  
14 52. Alberti KG, Zimmet P, Shaw J. International Diabetes Federation: a consensus on  
15  
16 Type 2 diabetes prevention. *Diabetic medicine : a journal of the British Diabetic*  
17  
18 *Association* 2007;24(5):451-63. doi: 10.1111/j.1464-5491.2007.02157.x [published  
19  
20 Online First: 2007/05/02]

21  
22  
23 53. National Institute for Health and Care Excellence. BMI: preventing ill health and  
24  
25 premature death in black, Asian and other minority ethnic groups, 2013.  
26  
27 <https://www.nice.org.uk/guidance/ph46/chapter/1-Recommendations> (accessed 23  
28  
29 July, 2018).

30  
31  
32 54. Liu N, Zhang J, Yu X, et al. Development and testing of reliability and validity of  
33  
34 self-management scale for patients with hypertension 高血压病人自我管理量表的  
35  
36 研制与信效度检验. *Chinese Nursing Research* 护理研究: 中旬版  
37  
38 2015;29(5):1764-67.

39  
40  
41 55. Liu L. 2010 Chinese guidelines for the management of hypertension. *Zhonghua*  
42  
43 *xin xue guan bing za zhi* 2011;39(7):579-615.

44  
45  
46 56. Sedgwick P. Cross sectional studies: advantages and disadvantages. *BMJ: British*  
47  
48 *Medical Journal (Online)* 2014;348

49  
50  
51 57. Palmer PB, O'Connell DG. Regression Analysis for Prediction: Understanding the  
52  
53 Process. *Cardiopulmonary Physical Therapy Journal* 2009;20(3):23-6.  
54  
55  
56  
57  
58  
59  
60

- 1  
2  
3  
4 58. Abegaz TM, Shehab A, Gebreyohannes EA, et al. Nonadherence to  
5  
6 antihypertensive drugs: a systematic review and meta-analysis. *Medicine* 2017;96(4)  
7  
8  
9 59. Paulsen MS, Andersen M, Munck AP, et al. Socio-economic status influences  
10  
11 blood pressure control despite equal access to care. *Fam Pract* 2012;29(5):503-10. doi:  
12  
13 10.1093/fampra/cmr130 [published Online First: 2012/01/12]  
14  
15  
16 60. Leng B, Jin Y, Li G, et al. Socioeconomic status and hypertension: a  
17  
18 meta-analysis. *Journal of hypertension* 2015;33(2):221-29.  
19  
20  
21 61. Moser KA, Agrawal S, Smith GD, et al. Socio-demographic inequalities in the  
22  
23 prevalence, diagnosis and management of hypertension in India: analysis of  
24  
25 nationally-representative survey data. *PloS one* 2014;9(1):e86043.  
26  
27  
28 62. Liu GG, Vortherms SA, Hong X. China's Health Reform Update. *Annual Review*  
29  
30 *of Public Health* 2017;38(1):431-48. doi:  
31  
32 10.1146/annurev-publhealth-031816-044247  
33  
34  
35 63. Feng XL, Pang M, Beard J. Health system strengthening and hypertension  
36  
37 awareness, treatment and control: data from the China Health and Retirement  
38  
39 Longitudinal Study. *Bulletin of the World Health Organization* 2014;92(1):29-41. doi:  
40  
41 10.2471/blt.13.124495 [published Online First: 2014/01/07]  
42  
43  
44 64. Liu J, Shi L, Meng Q, et al. Income-related inequality in health insurance  
45  
46 coverage: analysis of China Health and Nutrition Survey of 2006 and 2009.  
47  
48 *International journal for equity in health* 2012;11(1):42. doi:  
49  
50 10.1186/1475-9276-11-42  
51  
52  
53 65. Duru OK, Vargas RB, Kermah D, et al. Health Insurance Status and Hypertension  
54  
55  
56  
57  
58  
59  
60

- 1  
2  
3  
4 Monitoring and Control in the United States. *American journal of hypertension*  
5  
6 2007;20(4):348-53. doi: 10.1016/j.amjhyper.2006.11.007  
7  
8  
9 66. Munger MA, Van Tassell BW, LaFleur J. Medication nonadherence: an  
10  
11 unrecognized cardiovascular risk factor. *Medscape General Medicine* 2007;9(3):58.  
12  
13 [published Online First: 2007/12/20]  
14  
15  
16  
17 67. Wang W, Lau Y, Loo A, et al. Medication adherence and its associated factors  
18  
19 among Chinese community-dwelling older adults with hypertension. *Heart & Lung:*  
20  
21 *The Journal of Acute and Critical Care* 2014;43(4):278-83.  
22  
23  
24  
25 68. Yue Z, Bin W, Weilin Q, et al. Effect of medication adherence on blood pressure  
26  
27 control and risk factors for antihypertensive medication adherence. *Journal of*  
28  
29 *evaluation in clinical practice* 2015;21(1):166-72.  
30  
31  
32  
33 69. Borzecki AM, Glickman ME, Kader B, et al. The effect of age on hypertension  
34  
35 control and management. *American journal of hypertension* 2006;19(5):520-27.  
36  
37  
38 70. Violán C, Foguet-Boreu Q, Roso-Llorach A, et al. Burden of multimorbidity,  
39  
40 socioeconomic status and use of health services across stages of life in urban areas: a  
41  
42 cross-sectional study. *BMC public health* 2014;14(1):530.  
43  
44  
45  
46 71. Noh J, Kim HC, Shin A, et al. Prevalence of Comorbidity among People with  
47  
48 Hypertension: The Korea National Health and Nutrition Examination Survey  
49  
50 2007-2013. *Korean circulation journal* 2016;46(5):672-80.  
51  
52  
53  
54 72. Chriss PM, Sheposh J, Carlson B, et al. Predictors of successful heart failure  
55  
56 self-care maintenance in the first three months after hospitalization. *Heart & lung :*  
57  
58 *the journal of critical care* 2004;33(6):345-53. [published Online First: 2004/12/15]  
59  
60

- 1  
2  
3  
4 73. Ma C. A cross-sectional survey of medication adherence and associated factors for  
5  
6 rural patients with hypertension. *Applied Nursing Research* 2016;31:94-99.  
7  
8  
9 74. Li YT, Wang HH, Liu KQ, et al. Medication adherence and blood pressure control  
10  
11 among hypertensive patients with coexisting long-term conditions in primary care  
12  
13 settings: A cross-sectional analysis. *Medicine* 2016;95(20)  
14  
15  
16 75. Smith PM, Koehoorn M. Measuring gender when you don't have a gender  
17  
18 measure: constructing a gender index using survey data. *International journal for*  
19  
20 *equity in health* 2016;15:82. doi: 10.1186/s12939-016-0370-4 [published Online First:  
21  
22 2016/05/29]  
23  
24  
25 76. Rahman M, Williams G, Al Mamun A. Gender differences in hypertension  
26  
27 awareness, antihypertensive use and blood pressure control in Bangladeshi adults:  
28  
29 findings from a national cross-sectional survey. *Journal of Health, Population and*  
30  
31 *Nutrition* 2017;36(1):23.  
32  
33  
34 77. Chu SH, Baek JW, Kim ES, et al. Gender differences in hypertension control  
35  
36 among older Korean adults: Korean social life, health, and aging project. *Journal of*  
37  
38 *Preventive Medicine and Public Health* 2015;48(1):38.  
39  
40  
41 78. Ryan P, Sawin KJ. The Individual and Family Self-Management Theory:  
42  
43 Background and perspectives on context, process, and outcomes. *Nursing Outlook*  
44  
45 2009;57(4):217-25.e6. doi: <https://doi.org/10.1016/j.outlook.2008.10.004>  
46  
47  
48 79. Chobanian AV, Bakris GL, Black HR, et al. Seventh report of the Joint National  
49  
50  
51  
52  
53  
54  
55  
56  
57  
58  
59  
60  
Committee on Prevention, Detection, Evaluation, and Treatment of High Blood  
Pressure. *Hypertension* 2003;42(6):1206-52. doi:



- 1  
2  
3  
4 10.1161/01.HYP.0000107251.49515.c2 [published Online First: 2003/12/06]  
5  
6  
7 80. Nguyen QC, Needham Waddell E, Kerker BD, et al. Awareness, Treatment, and  
8  
9 Control of Hypertension and Hypercholesterolemia Among Insured Residents of New  
10  
11 York City, 2004. *Preventing chronic disease* 2011;8(5)  
12  
13  
14 81. Wogen J. Patient adherence with hypertension medication. *Journal of Managed*  
15  
16 *Care Pharmacy* 2004;10(1):90-91.  
17  
18  
19 82. Morisky DE, Ang A, Krousel - Wood M, et al. Predictive validity of a medication  
20  
21 adherence measure in an outpatient setting. *The Journal of Clinical Hypertension*  
22  
23 2008;10(5):348-54.  
24  
25  
26  
27 83. King-Shier KM, Singh S, Khan NA, et al. Ethno-Cultural Considerations in  
28  
29 Cardiac Patients' Medication Adherence. *Clinical nursing research*  
30  
31 2017;26(5):576-91. doi: 10.1177/1054773816646078  
32  
33  
34  
35 84. Hsu YH, Mao CL, Wey M. Antihypertensive medication adherence among elderly  
36  
37 Chinese Americans. *Journal of Transcultural Nursing* 2010;21(4):297-305.  
38  
39  
40 85. Li WW, Stewart AL, Stotts N, et al. Cultural factors associated with  
41  
42 antihypertensive medication adherence in Chinese immigrants. *Journal of*  
43  
44 *Cardiovascular Nursing* 2006;21(5):354-62.  
45  
46  
47  
48 86. McManus RJ, Mant J, Haque MS, et al. Effect of self-monitoring and medication  
49  
50 self-titration on systolic blood pressure in hypertensive patients at high risk of  
51  
52 cardiovascular disease: the TASMIN-SR randomized clinical trial. *Jama*  
53  
54 2014;312(8):799-808.  
55  
56  
57  
58 87. Stergiou GS, Kollias A, Zeniodi M, et al. Home blood pressure monitoring:  
59  
60

1  
2  
3  
4 primary role in hypertension management. *Current hypertension reports*

5  
6 2014;16(8):462.

7  
8  
9 88. Choi HM, Kim HC, Kang DR. Sex differences in hypertension prevalence and  
10 control: Analysis of the 2010-2014 Korea National Health and Nutrition Examination  
11 Survey. *PloS one* 2017;12(5):e0178334. doi: 10.1371/journal.pone.0178334  
12  
13

14  
15  
16 89. Zhou H, Wang K, Zhou X, et al. Prevalence and Gender-Specific Influencing  
17 Factors of Hypertension among Chinese Adults: A Cross-Sectional Survey Study in  
18 Nanchang, China. *International journal of environmental research and public health*  
19  
20 2018;15(2) doi: 10.3390/ijerph15020382 [published Online First: 2018/02/24]  
21  
22  
23  
24  
25  
26  
27  
28  
29  
30  
31  
32  
33  
34  
35  
36  
37  
38  
39  
40  
41  
42  
43  
44  
45  
46  
47  
48  
49  
50  
51  
52  
53  
54  
55  
56  
57  
58  
59  
60

**Table 1 Characteristics of community participants with hypertension**

|                         | <b>Total</b>   | <b>Men</b>     | <b>Women</b>   | <b>p Value</b> |
|-------------------------|----------------|----------------|----------------|----------------|
|                         | <b>(n=873)</b> | <b>(n=360)</b> | <b>(n=513)</b> |                |
|                         | Mean (SD)/     | Mean (SD)/     | Mean (SD)/     |                |
|                         | n (%)          | n (%)          | n (%)          |                |
| Age (years)             | 65 (9.5)       | 65 (9.9)       | 66 (9.2)       | 0.075          |
| Marriage Status         |                |                |                | <0.001         |
| Married                 | 757 (86.7)     | 346 (96.1)     | 411 (80.1)     |                |
| Single/Divorced/Widowed | 116 (13.3)     | 14 (3.9)       | 102 (19.9)     |                |
| Education               |                |                |                | <0.001         |
| Primary school or no    | 183 (21.0)     | 53 (14.7)      | 130 (25.3)     |                |
| High school             | 544 (62.3)     | 232 (64.4)     | 312 (60.8)     |                |
| College or higher       | 146 (16.7)     | 75 (20.8)      | 71 (13.8)      |                |
| Employment              |                |                |                | <0.001         |
| Employed                | 145 (16.6)     | 91 (25.3)      | 54 (10.5)      |                |
| Unemployed              | 132 (15.1)     | 44 (12.2)      | 88 (17.2)      |                |
| Retired                 | 596 (68.3)     | 225 (62.5)     | 371 (72.3)     |                |
| Personal Incomes        |                |                |                | <0.001         |
| ≤ ¥1500 (US\$225)       | 307 (35.2)     | 94 (26.1)      | 213 (41.5)     |                |
| > ¥1500 (US\$225)       | 566 (64.8)     | 266 (73.9)     | 300 (58.5)     |                |
| Health Insurance        |                |                |                | 0.170          |
| UEMI                    | 636 (72.9)     | 271 (75.3)     | 365 (71.2)     |                |

|                          |            |            |            |        |
|--------------------------|------------|------------|------------|--------|
| URMI                     | 103 (11.8) | 32 (8.9)   | 71 (13.8)  |        |
| NCMS                     | 100 (11.5) | 43 (11.9)  | 57 (11.1)  |        |
| Uninsured                | 34 (3.9)   | 14 (3.9)   | 20 (3.9)   |        |
| <b>BMI</b>               |            |            |            |        |
| Underweight              | 10 (1.1)   | 2 (0.6)    | 8 (1.6)    | 0.377  |
| Normal                   | 304 (34.8) | 120 (33.3) | 184 (35.9) |        |
| Overweight               | 412 (47.2) | 178 (49.4) | 234 (45.6) |        |
| Obese                    | 147 (16.8) | 60 (16.7)  | 87 (17.0)  |        |
| <b>WC</b>                |            |            |            |        |
| Normal                   | 229 (26.2) | 144 (40.0) | 85 (16.6)  | <0.001 |
| Obese                    | 644 (73.8) | 216 (60.0) | 428 (83.4) |        |
| <b>Smoking Status</b>    |            |            |            |        |
| Smoking                  | 239 (27.4) | 216 (60.0) | 23 (4.5)   | <0.001 |
| Non-smoking              | 634 (72.6) | 144 (40.0) | 490 (95.5) |        |
| <b>Drinking Status</b>   |            |            |            |        |
| Drinking                 | 196 (22.5) | 176 (48.9) | 20 (3.9)   | <0.001 |
| Non-drinking             | 677 (77.5) | 184 (51.1) | 493 (96.1) |        |
| <b>Family History</b>    |            |            |            |        |
| Yes                      | 533 (61.1) | 219 (60.8) | 314 (61.2) | 0.944  |
| No                       | 340 (38.9) | 141 (39.2) | 199 (38.8) |        |
| Disease Duration (years) | 10 (9.0)   | 9 (7.9)    | 10 (9.7)   | 0.079  |
| <b>Comorbidities</b>     |            |            |            |        |

|                          |            |            |            |       |
|--------------------------|------------|------------|------------|-------|
| CAD                      | 195 (22.3) | 75 (20.8)  | 120 (23.4) | 0.370 |
| Back/Neck problem        | 97 (11.1)  | 27 (7.5)   | 70 (13.6)  | 0.004 |
| Stroke                   | 96 (11.0)  | 44 (12.2)  | 52 (10.1)  | 0.334 |
| Diabetes                 | 91 (10.4)  | 35 (9.7)   | 56 (10.9)  | 0.569 |
| Arthritis                | 61 (7.0)   | 18 (5.0)   | 43 (8.4)   | 0.049 |
| COPD                     | 55 (6.3)   | 24 (6.7)   | 31 (6.0)   | 0.710 |
| MI                       | 17 (1.9)   | 10 (2.8)   | 7 (1.4)    | 0.141 |
| Nephropathy              | 11 (1.3)   | 7 (1.9)    | 4 (0.8)    | 0.132 |
| Gastrointestinal disease | 10 (1.1)   | 5 (1.4)    | 5 (1.0)    | 0.574 |
| 0                        | 401 (45.9) | 184 (51.1) | 217 (42.3) | 0.010 |
| ≥1                       | 472 (54.1) | 176 (48.9) | 296 (57.7) |       |
| BP Control               |            |            |            | 0.242 |
| Good control             | 287 (32.9) | 110 (30.6) | 177 (34.5) |       |
| Poor control             | 586 (67.1) | 250 (69.4) | 336 (65.5) |       |

UEMI, urban employees' medical insurance; URMI, urban residents' medical insurance; NCMS, new rural cooperative medical scheme; BMI, body mass index; WC, waist circumference; CAD, coronary artery disease; COPD, chronic obstructive pulmonary disease; MI, myocardial infarction; BP, blood pressure.

**Table 2** Difference in self-management processes in community participants with hypertension

|                                        | <b>Total</b>   | <b>Men</b>     | <b>Women</b>   | <b>p Value</b> |
|----------------------------------------|----------------|----------------|----------------|----------------|
|                                        | <b>(n=873)</b> | <b>(n=360)</b> | <b>(n=513)</b> |                |
|                                        | Mean (SD)      | Mean (SD)      | Mean (SD)      |                |
| Treatment Management                   | 59.54 (17.43)  | 59.49 (18.01)  | 59.58 (17.02)  | 0.937          |
| Diet Management                        | 70.18 (23.36)  | 67.71 (24.18)  | 71.91 (22.63)  | 0.009          |
| Physical Exercise Management           | 60.80 (32.69)  | 59.63 (33.21)  | 61.62 (32.33)  | 0.377          |
| Lifestyle Management                   | 63.47 (18.38)  | 64.92 (17.91)  | 62.45 (18.66)  | 0.051          |
| Risk Factors Management                | 86.91 (24.64)  | 73.70 (30.53)  | 96.18 (13.12)  | <0.001         |
| Total Score                            | 65.58 (13.22)  | 63.61 (14.28)  | 66.96 (12.25)  | <0.001         |
| No. of Visiting CHC (year), n (%)      |                |                |                | 0.060          |
| 0                                      | 322 (36.9)     | 146 (40.6)     | 176 (34.3)     |                |
| ≥1                                     | 551 (63.1)     | 214 (59.4)     | 337 (65.7)     |                |
| No. of Visiting Hospital (year), n (%) |                |                |                | 0.001          |
| 0                                      | 653 (74.8)     | 290 (80.6)     | 363 (70.8)     |                |
| ≥1                                     | 220 (25.2)     | 70 (19.4)      | 150 (29.2)     |                |

CHC, Community health centers.

**Table 3** Logistic regression of blood pressure control among community participants with hypertension

|                              | Model 1 |      |      | Model 2 |      |      | Model 3 |       |      |      |      |       |
|------------------------------|---------|------|------|---------|------|------|---------|-------|------|------|------|-------|
|                              | OR      | CI   | p    | OR      | CI   | p    | OR      | CI    | p    |      |      |       |
| Age (year)                   | 1.00    | 0.98 | 1.02 | 0.965   | 0.99 | 0.98 | 1.01    | 0.545 | 1.00 | 0.98 | 1.02 | 0.600 |
| Sex (vs. male)               | 0.76    | 0.55 | 1.03 | 0.080   | 0.85 | 0.56 | 1.29    | 0.445 | 0.80 | 0.52 | 1.24 | 0.314 |
| Marital Status (vs. married) | 1.27    | 0.80 | 2.02 | 0.319   | 1.25 | 0.78 | 2.01    | 0.349 | 1.20 | 0.74 | 1.94 | 0.470 |
| Education                    |         |      |      | 0.327   |      |      |         | 0.463 |      |      |      | 0.652 |
| HS (vs. college)             | 1.32    | 0.87 | 1.99 | 0.191   | 1.28 | 0.84 | 1.95    | 0.247 | 1.22 | 0.79 | 1.87 | 0.378 |
| PS (vs. college)             | 1.50    | 0.80 | 2.80 | 0.204   | 1.37 | 0.72 | 2.58    | 0.339 | 1.25 | 0.65 | 2.40 | 0.496 |
| Employment                   |         |      |      | 0.163   |      |      |         | 0.148 |      |      |      | 0.218 |
| Unemployed (vs. employed)    | 0.84    | 0.44 | 1.64 | 0.617   | 0.87 | 0.44 | 1.70    | 0.673 | 0.84 | 0.42 | 1.66 | 0.611 |
| Retired (vs. employed)       | 0.65    | 0.41 | 1.02 | 0.062   | 0.64 | 0.40 | 1.02    | 0.059 | 0.66 | 0.41 | 1.06 | 0.86  |
| Income (vs. >¥1500 )         | 2.54    | 0.78 | 8.33 | 0.123   | 2.68 | 0.80 | 8.93    | 0.109 | 2.41 | 0.71 | 8.12 | 0.157 |

|    |                            |      |      |      |       |      |      |      |       |      |      |      |       |
|----|----------------------------|------|------|------|-------|------|------|------|-------|------|------|------|-------|
| 1  |                            |      |      |      |       |      |      |      |       |      |      |      |       |
| 2  |                            |      |      |      |       |      |      |      |       |      |      |      |       |
| 3  |                            |      |      |      |       |      |      |      |       |      |      |      |       |
| 4  |                            |      |      |      |       |      |      |      |       |      |      |      |       |
| 5  | Health Insurance           |      |      |      | 0.075 |      |      |      | 0.082 |      |      |      | 0.182 |
| 6  |                            |      |      |      |       |      |      |      |       |      |      |      |       |
| 7  |                            |      |      |      |       |      |      |      |       |      |      |      |       |
| 8  | URMI (vs. UEMI)            | 1.13 | 0.69 | 1.84 | 0.624 | 1.10 | 0.67 | 1.79 | 0.717 | 0.97 | 0.58 | 1.63 | 0.920 |
| 9  |                            |      |      |      |       |      |      |      |       |      |      |      |       |
| 10 | NCMS (vs. UEMI)            | 2.70 | 1.28 | 5.67 | 0.009 | 2.69 | 1.27 | 5.69 | 0.010 | 2.26 | 1.06 | 4.81 | 0.034 |
| 11 |                            |      |      |      |       |      |      |      |       |      |      |      |       |
| 12 |                            |      |      |      |       |      |      |      |       |      |      |      |       |
| 13 | Uninsured (vs. UEMI)       | 1.35 | 0.55 | 3.33 | 0.516 | 1.27 | 0.51 | 3.16 | 0.607 | 1.14 | 0.45 | 2.86 | 0.787 |
| 14 |                            |      |      |      |       |      |      |      |       |      |      |      |       |
| 15 |                            |      |      |      |       |      |      |      |       |      |      |      |       |
| 16 | Education*Income           |      |      |      | 0.460 |      |      |      | 0.426 |      |      |      | 0.410 |
| 17 |                            |      |      |      |       |      |      |      |       |      |      |      |       |
| 18 | HS*Income (<¥ 1500)        | 0.53 | 0.15 | 1.84 | 0.319 | 0.52 | 0.15 | 1.84 | 0.312 | 0.54 | 0.15 | 1.92 | 0.338 |
| 19 |                            |      |      |      |       |      |      |      |       |      |      |      |       |
| 20 |                            |      |      |      |       |      |      |      |       |      |      |      |       |
| 21 | PS*Income (<¥ 1500)        | 0.78 | 0.19 | 3.12 | 0.722 | 0.79 | 0.19 | 3.24 | 0.745 | 0.86 | 0.21 | 3.56 | 0.830 |
| 22 |                            |      |      |      |       |      |      |      |       |      |      |      |       |
| 23 |                            |      |      |      |       |      |      |      |       |      |      |      |       |
| 24 | BMI (kg/m <sup>2</sup> )   |      |      |      |       | 1.01 | 0.95 | 1.06 | 0.868 | 1.00 | 0.95 | 1.06 | 0.972 |
| 25 |                            |      |      |      |       |      |      |      |       |      |      |      |       |
| 26 | WC (vs. normal)            |      |      |      |       | 1.14 | 0.76 | 1.69 | 0.535 | 1.12 | 0.75 | 1.69 | 0.585 |
| 27 |                            |      |      |      |       |      |      |      |       |      |      |      |       |
| 28 |                            |      |      |      |       |      |      |      |       |      |      |      |       |
| 29 | Smoking (vs. non-smoker)   |      |      |      |       | 1.38 | 0.87 | 2.21 | 0.173 | 1.52 | 0.93 | 2.51 | 0.099 |
| 30 |                            |      |      |      |       |      |      |      |       |      |      |      |       |
| 31 | Drinking (vs. no-drinking) |      |      |      |       | 1.02 | 0.65 | 1.62 | 0.926 | 0.95 | 0.58 | 1.56 | 0.833 |
| 32 |                            |      |      |      |       |      |      |      |       |      |      |      |       |
| 33 |                            |      |      |      |       |      |      |      |       |      |      |      |       |
| 34 | Family History (vs. no)    |      |      |      |       | 0.84 | 0.62 | 1.15 | 0.283 | 0.89 | 0.65 | 1.23 | 0.484 |
| 35 |                            |      |      |      |       |      |      |      |       |      |      |      |       |
| 36 |                            |      |      |      |       |      |      |      |       |      |      |      |       |
| 37 | Disease Duration (years)   |      |      |      |       | 1.03 | 1.01 | 1.04 | 0.006 | 1.03 | 1.01 | 1.04 | 0.008 |
| 38 |                            |      |      |      |       |      |      |      |       |      |      |      |       |
| 39 |                            |      |      |      |       |      |      |      |       |      |      |      |       |
| 40 |                            |      |      |      |       |      |      |      |       |      |      |      |       |
| 41 |                            |      |      |      |       |      |      |      |       |      |      |      |       |
| 42 |                            |      |      |      |       |      |      |      |       |      |      |      |       |
| 43 |                            |      |      |      |       |      |      |      |       |      |      |      |       |
| 44 |                            |      |      |      |       |      |      |      |       |      |      |      |       |
| 45 |                            |      |      |      |       |      |      |      |       |      |      |      |       |
| 46 |                            |      |      |      |       |      |      |      |       |      |      |      |       |



|    |                                 |          |       |          |       |          |       |      |      |      |       |
|----|---------------------------------|----------|-------|----------|-------|----------|-------|------|------|------|-------|
| 1  |                                 |          |       |          |       |          |       |      |      |      |       |
| 2  |                                 |          |       |          |       |          |       |      |      |      |       |
| 3  |                                 |          |       |          |       |          |       |      |      |      |       |
| 4  |                                 |          |       |          |       |          |       |      |      |      |       |
| 5  | Comorbidities (vs. no)          |          |       | 1.13     | 0.83  | 1.54     | 0.443 | 1.14 | 0.83 | 1.56 | 0.430 |
| 6  |                                 |          |       |          |       |          |       |      |      |      |       |
| 7  |                                 |          |       |          |       |          |       |      |      |      |       |
| 8  | Treatment Management            |          |       |          |       |          |       | 0.98 | 0.97 | 0.99 | 0.000 |
| 9  |                                 |          |       |          |       |          |       |      |      |      |       |
| 10 | Diet Management                 |          |       |          |       |          |       | 1.00 | 0.99 | 1.01 | 0.639 |
| 11 |                                 |          |       |          |       |          |       |      |      |      |       |
| 12 |                                 |          |       |          |       |          |       |      |      |      |       |
| 13 | Physical Exercise Management    |          |       |          |       |          |       | 1.00 | 0.99 | 1.00 | 0.711 |
| 14 |                                 |          |       |          |       |          |       |      |      |      |       |
| 15 |                                 |          |       |          |       |          |       |      |      |      |       |
| 16 | Lifestyle Management            |          |       |          |       |          |       | 1.00 | 0.99 | 1.01 | 0.449 |
| 17 |                                 |          |       |          |       |          |       |      |      |      |       |
| 18 | Risk Factor Management          |          |       |          |       |          |       | 1.00 | 0.99 | 1.01 | 0.381 |
| 19 |                                 |          |       |          |       |          |       |      |      |      |       |
| 20 |                                 |          |       |          |       |          |       |      |      |      |       |
| 21 | No. of Visiting CHC (year)      |          |       |          |       |          |       | 1.00 | 0.98 | 1.03 | 0.743 |
| 22 |                                 |          |       |          |       |          |       |      |      |      |       |
| 23 |                                 |          |       |          |       |          |       |      |      |      |       |
| 24 | No. of Visiting Hospital (year) |          |       |          |       |          |       | 0.99 | 0.92 | 1.07 | 0.800 |
| 25 |                                 |          |       |          |       |          |       |      |      |      |       |
| 26 | Chi-square                      | 57.249   | df=13 | 70.298   | df=20 | 95.032   | df=27 |      |      |      |       |
| 27 |                                 |          |       |          |       |          |       |      |      |      |       |
| 28 |                                 |          |       |          |       |          |       |      |      |      |       |
| 29 | $\Delta$ Chi-square             | 57.249   | df=13 | 13.048   | df=8  | 24.734   | df=7  |      |      |      |       |
| 30 |                                 |          |       |          |       |          |       |      |      |      |       |
| 31 | -2 Loglikelihood                | 1048.476 |       | 1035.428 |       | 1010.694 |       |      |      |      |       |
| 32 |                                 |          |       |          |       |          |       |      |      |      |       |

HS, high school; PS, primary school; UEMI, urban employees' medical insurance; URMI, urban residents' medical insurance; NCMS, new rural cooperative medical scheme; BMI, body mass index; WC, waist circumference; CHC, community health centers.

1  
2  
3  
4 **Figure Legend**  
5

6 *Figure 1.* A flowchart of included and excluded cases.  
7  
8  
9  
10  
11  
12  
13  
14  
15  
16  
17  
18  
19  
20  
21  
22  
23  
24  
25  
26  
27  
28  
29  
30  
31  
32  
33  
34  
35  
36  
37  
38  
39  
40  
41  
42  
43  
44  
45  
46  
47  
48  
49  
50  
51  
52  
53  
54  
55  
56  
57  
58  
59  
60

For peer review only



Figure 1. A flowchart of included and excluded cases.

1  
2  
3  
4  
5  
6  
7  
8  
9  
10  
11  
12  
13  
14  
15  
16  
17  
18  
19  
20  
21  
22  
23  
24  
25  
26  
27  
28  
29  
30  
31  
32  
33  
34  
35  
36  
37  
38  
39  
40  
41  
42  
43  
44  
45  
46

**Translation of self-management scale for patients with hypertension**

| <b>Self-management Scale for Patients with Hypertension</b> |                                                                                                                 |              |                     |                  |                               |               |
|-------------------------------------------------------------|-----------------------------------------------------------------------------------------------------------------|--------------|---------------------|------------------|-------------------------------|---------------|
|                                                             |                                                                                                                 | <b>Never</b> | <b>Occasionally</b> | <b>Sometimes</b> | <b>Frequently<br/>(Often)</b> | <b>Always</b> |
|                                                             | <b>Treatment Management</b>                                                                                     |              |                     |                  |                               |               |
| 1                                                           | Check your blood pressure                                                                                       |              |                     |                  |                               |               |
| 2                                                           | Visiting a doctor when the blood pressure fluctuates too much                                                   |              |                     |                  |                               |               |
| 3                                                           | Take medications as prescribed                                                                                  |              |                     |                  |                               |               |
| 4                                                           | Use a method to help you remember to take your medications on time<br>(e.g., use a pill box or other reminders) |              |                     |                  |                               |               |
| 5                                                           | Keep doctor or nurse appointments                                                                               |              |                     |                  |                               |               |
| 6                                                           | Adjusting antihypertensive medications yourself at home based on the<br>level of blood pressure                 |              |                     |                  |                               |               |

|    |                                                                                         |  |  |  |  |  |
|----|-----------------------------------------------------------------------------------------|--|--|--|--|--|
| 7  | Forget to take antihypertensive medications                                             |  |  |  |  |  |
| 8  | Buy and take antihypertensive medications from recommendation of friends or advertising |  |  |  |  |  |
|    | <b>Diet Management</b>                                                                  |  |  |  |  |  |
| 9  | Eat your meals on time and eat a balanced meal.                                         |  |  |  |  |  |
| 10 | Eat a low-salt diet (eat 6 grams or less than 6 grams of salt daily)                    |  |  |  |  |  |
|    | <b>Physical Exercise Management</b>                                                     |  |  |  |  |  |
| 11 | Choose an appropriate exercise (e.g., jogging, Tai Chi, etc.)                           |  |  |  |  |  |
| 12 | Exercise more than 3 days per week, longer than 30 minutes each time                    |  |  |  |  |  |
| 13 | Exercise at least 30 minutes after your meal                                            |  |  |  |  |  |
|    | <b>Lifestyle Management</b>                                                             |  |  |  |  |  |
| 14 | Get adequate sleep                                                                      |  |  |  |  |  |
| 15 | Maintain a healthy bowel regime (i.e., maintain regular bowel habits)                   |  |  |  |  |  |

1  
2  
3  
4  
5  
6  
7  
8  
9  
10  
11  
12  
13  
14  
15  
16  
17  
18  
19  
20  
21  
22  
23  
24  
25  
26  
27  
28  
29  
30  
31  
32  
33  
34  
35  
36  
37  
38  
39  
40  
41  
42  
43  
44  
45  
46

|    |                                                              |  |  |  |  |  |
|----|--------------------------------------------------------------|--|--|--|--|--|
|    | or normal bowel movements)                                   |  |  |  |  |  |
| 16 | Engage in social activities                                  |  |  |  |  |  |
| 17 | Try to lose weight or control body weight                    |  |  |  |  |  |
| 18 | Keep your mood stable                                        |  |  |  |  |  |
|    | <b>Risk Factor Management</b>                                |  |  |  |  |  |
| 19 | Smoking                                                      |  |  |  |  |  |
| 20 | Drinking (daily amount of alcohol intake more than 25 grams) |  |  |  |  |  |
| 21 | Overstrained or excessive pressure at work                   |  |  |  |  |  |

**STROBE 2007 (v4) Statement—Checklist of items that should be included in reports of *cross-sectional studies***

| Section/Topic                | Item # | Recommendation                                                                                                                                                                       | Reported on page # |
|------------------------------|--------|--------------------------------------------------------------------------------------------------------------------------------------------------------------------------------------|--------------------|
| <b>Title and abstract</b>    | 1      | (a) Indicate the study's design with a commonly used term in the title or the abstract                                                                                               | 1                  |
|                              |        | (b) Provide in the abstract an informative and balanced summary of what was done and what was found                                                                                  | 2-3                |
| <b>Introduction</b>          |        |                                                                                                                                                                                      |                    |
| Background/rationale         | 2      | Explain the scientific background and rationale for the investigation being reported                                                                                                 | 4-6                |
| Objectives                   | 3      | State specific objectives, including any prespecified hypotheses                                                                                                                     | 6                  |
| <b>Methods</b>               |        |                                                                                                                                                                                      |                    |
| Study design                 | 4      | Present key elements of study design early in the paper                                                                                                                              | 6-7                |
| Setting                      | 5      | Describe the setting, locations, and relevant dates, including periods of recruitment, exposure, follow-up, and data collection                                                      | 6-7                |
| Participants                 | 6      | (a) Give the eligibility criteria, and the sources and methods of selection of participants                                                                                          | 7-8                |
| Variables                    | 7      | Clearly define all outcomes, exposures, predictors, potential confounders, and effect modifiers. Give diagnostic criteria, if applicable                                             | 8-10               |
| Data sources/<br>measurement | 8*     | For each variable of interest, give sources of data and details of methods of assessment (measurement). Describe comparability of assessment methods if there is more than one group | 8-10               |
| Bias                         | 9      | Describe any efforts to address potential sources of bias                                                                                                                            | 10                 |
| Study size                   | 10     | Explain how the study size was arrived at                                                                                                                                            | 10                 |
| Quantitative variables       | 11     | Explain how quantitative variables were handled in the analyses. If applicable, describe which groupings were chosen and why                                                         | 10-11              |
| Statistical methods          | 12     | (a) Describe all statistical methods, including those used to control for confounding                                                                                                | 10-11              |
|                              |        | (b) Describe any methods used to examine subgroups and interactions                                                                                                                  | N/A                |
|                              |        | (c) Explain how missing data were addressed                                                                                                                                          | 11-12              |
|                              |        | (d) If applicable, describe analytical methods taking account of sampling strategy                                                                                                   | N/A                |
|                              |        | (e) Describe any sensitivity analyses                                                                                                                                                | N/A                |
| <b>Results</b>               |        |                                                                                                                                                                                      |                    |

|                          |     |                                                                                                                                                                                                              |               |
|--------------------------|-----|--------------------------------------------------------------------------------------------------------------------------------------------------------------------------------------------------------------|---------------|
| Participants             | 13* | (a) Report numbers of individuals at each stage of study—eg numbers potentially eligible, examined for eligibility, confirmed eligible, included in the study, completing follow-up, and analysed            | 11-12         |
|                          |     | (b) Give reasons for non-participation at each stage                                                                                                                                                         | 11-12         |
|                          |     | (c) Consider use of a flow diagram                                                                                                                                                                           | 12 (Figure 1) |
| Descriptive data         | 14* | (a) Give characteristics of study participants (eg demographic, clinical, social) and information on exposures and potential confounders                                                                     | 12 (Table 1)  |
|                          |     | (b) Indicate number of participants with missing data for each variable of interest                                                                                                                          | N/A           |
| Outcome data             | 15* | Report numbers of outcome events or summary measures                                                                                                                                                         | 13            |
| Main results             | 16  | (a) Give unadjusted estimates and, if applicable, confounder-adjusted estimates and their precision (eg, 95% confidence interval). Make clear which confounders were adjusted for and why they were included | N/A           |
|                          |     | (b) Report category boundaries when continuous variables were categorized                                                                                                                                    | N/A           |
|                          |     | (c) If relevant, consider translating estimates of relative risk into absolute risk for a meaningful time period                                                                                             | N/A           |
| Other analyses           | 17  | Report other analyses done—eg analyses of subgroups and interactions, and sensitivity analyses                                                                                                               | N/A           |
| <b>Discussion</b>        |     |                                                                                                                                                                                                              |               |
| Key results              | 18  | Summarise key results with reference to study objectives                                                                                                                                                     | 13-17         |
| Limitations              | 19  | Discuss limitations of the study, taking into account sources of potential bias or imprecision. Discuss both direction and magnitude of any potential bias                                                   | 17-18         |
| Interpretation           | 20  | Give a cautious overall interpretation of results considering objectives, limitations, multiplicity of analyses, results from similar studies, and other relevant evidence                                   | 13-17         |
| Generalisability         | 21  | Discuss the generalisability (external validity) of the study results                                                                                                                                        | 18            |
| <b>Other information</b> |     |                                                                                                                                                                                                              |               |
| Funding                  | 22  | Give the source of funding and the role of the funders for the present study and, if applicable, for the original study on which the present article is based                                                | 19            |

\*Give information separately for cases and controls in case-control studies and, if applicable, for exposed and unexposed groups in cohort and cross-sectional studies.

**Note:** An Explanation and Elaboration article discusses each checklist item and gives methodological background and published examples of transparent reporting. The STROBE checklist is best used in conjunction with this article (freely available on the Web sites of PLoS Medicine at <http://www.plosmedicine.org/>, Annals of Internal Medicine at <http://www.annals.org/>, and Epidemiology at <http://www.epidem.com/>). Information on the STROBE Initiative is available at [www.strobe-statement.org](http://www.strobe-statement.org).
