# Supplementary material for: Self-management and blood pressure control in China: a community-based multicentre cross-sectional study
Source: PubMed Central journal article supplement — BMJ Open. 2019 Mar 20;9(3):e025819. doi: 10.1136/bmjopen-2018-025819 (PMC6528047; doi:10.1136/bmjopen-2018-025819), 2019-03-20
Supplement: bmjopen-2018-025819supp001.pdf [file bmjopen-2018-025819supp001.pdf]

**Translation of self-management scale for patients with hypertension**

| <b>Self-management Scale for Patients with Hypertension</b> |                                                                                                                 |              |                     |                  |                               |               |
|-------------------------------------------------------------|-----------------------------------------------------------------------------------------------------------------|--------------|---------------------|------------------|-------------------------------|---------------|
|                                                             |                                                                                                                 | <b>Never</b> | <b>Occasionally</b> | <b>Sometimes</b> | <b>Frequently<br/>(Often)</b> | <b>Always</b> |
|                                                             | <b>Treatment Management</b>                                                                                     |              |                     |                  |                               |               |
| 1                                                           | Check your blood pressure                                                                                       |              |                     |                  |                               |               |
| 2                                                           | Visiting a doctor when the blood pressure fluctuates too much                                                   |              |                     |                  |                               |               |
| 3                                                           | Take medications as prescribed                                                                                  |              |                     |                  |                               |               |
| 4                                                           | Use a method to help you remember to take your medications on time<br>(e.g., use a pill box or other reminders) |              |                     |                  |                               |               |
| 5                                                           | Keep doctor or nurse appointments                                                                               |              |                     |                  |                               |               |
| 6                                                           | Adjusting antihypertensive medications yourself at home based on the<br>level of blood pressure                 |              |                     |                  |                               |               |

|    |                                                                                         |  |  |  |  |  |
|----|-----------------------------------------------------------------------------------------|--|--|--|--|--|
| 7  | Forget to take antihypertensive medications                                             |  |  |  |  |  |
| 8  | Buy and take antihypertensive medications from recommendation of friends or advertising |  |  |  |  |  |
|    | <b>Diet Management</b>                                                                  |  |  |  |  |  |
| 9  | Eat your meals on time and eat a balanced meal.                                         |  |  |  |  |  |
| 10 | Eat a low-salt diet (eat 6 grams or less than 6 grams of salt daily)                    |  |  |  |  |  |
|    | <b>Physical Exercise Management</b>                                                     |  |  |  |  |  |
| 11 | Choose an appropriate exercise (e.g., jogging, Tai Chi, etc.)                           |  |  |  |  |  |
| 12 | Exercise more than 3 days per week, longer than 30 minutes each time                    |  |  |  |  |  |
| 13 | Exercise at least 30 minutes after your meal                                            |  |  |  |  |  |
|    | <b>Lifestyle Management</b>                                                             |  |  |  |  |  |
| 14 | Get adequate sleep                                                                      |  |  |  |  |  |
| 15 | Maintain a healthy bowel regime (i.e., maintain regular bowel habits)                   |  |  |  |  |  |

|    |                                                              |  |  |  |  |  |
|----|--------------------------------------------------------------|--|--|--|--|--|
|    | or normal bowel movements)                                   |  |  |  |  |  |
| 16 | Engage in social activities                                  |  |  |  |  |  |
| 17 | Try to lose weight or control body weight                    |  |  |  |  |  |
| 18 | Keep your mood stable                                        |  |  |  |  |  |
|    | <b>Risk Factor Management</b>                                |  |  |  |  |  |
| 19 | Smoking                                                      |  |  |  |  |  |
| 20 | Drinking (daily amount of alcohol intake more than 25 grams) |  |  |  |  |  |
| 21 | Overstrained or excessive pressure at work                   |  |  |  |  |  |
